# Supplementary material
Source: PubMed Central journal article supplement (PMC6374080)
Supplement: jcsm.15.2.301s1.pdf [file jcsm.15.2.301s1.pdf]

## SUPPLEMENTAL MATERIALS – PAP Guideline Meta-Analyses and Summary of Findings Tables

**All Literature Search Terms:** obstructive sleep apnea, obstructive sleep apnoea, positive airway pressure, continuous positive airway pressure, automated, auto-titrating, auto-CPAP, auto nCPAP, auto-continuous, self-adjusting, APAP, BPAP, bilevel positive airway pressure, BPAP, auto-BPAP, oronasal, interface, nasal pillows, nasal mask, masks, chin-strap, education, educational, behavior, behavioral, desensitization, cognitive behavioral therapy, cognitive, neurobehavioral, supportive therapy, self-efficacy, healthcare provider, nurse clinician, respiratory therapist, sleep physician, sleep specialist, motivation, humidified, humidification, humidifier, heated tubing, monitor, monitoring, telemedicine, telemonitoring, modem, chronometer, microprocessor, A-flex, flexible, airway, pressure, pressure relief, manual titration, in-laboratory, titration, autotitration, portable monitoring, home-based diagnosis, nasal CPAP, nCPAP, dipping, non-dipping, refractory hypertension, hypertension, blood pressure, glucose, hemoglobin A1c, pre-diabetes, diabetes, metabolic syndrome, insulin resistance, coronary artery disease, congestive heart failure, myocardial infarction, revascularization, percutaneous coronary intervention, cardiac catheterization, coronary artery bypass graft, heart failure, ejection fraction, echocardiogram, stroke, cerebral vascular event, transient ischemic attack, arrhythmia, atrial fibrillation, mortality, sudden cardiac death, cardiovascular, hospitalization, 30-day readmission, psychomotor vigilance test, memory, psychomotor function, executive function, learning, driving simulator, motor vehicle crashes, line crossing, quality of life, SF-36, FOSQ, SAQLI, Quebec sleep questionnaire, euroqol, EQ5D, sleepiness, MSLT, MWT, OSLER, PSQI, adherence, compliance, machine run time, side effects, AHI, and RDI

**Broad-Based Search Terms:** obstructive sleep apnea and positive airway pressure

**Literature Search Limits:** RCTs (all PICO), observational studies (PICO 1 MVC, 3, and 8 only), humans, English language, and adults

**Inclusion Criteria:** RCTs (all PICO), observational studies (PICO 1 MVC, 3, and 8 only), adult patients with OSA, study sample size  $\geq 10$ , PAP therapy for at least 1 week (PICO 8, 9 only), PAP therapy for at least 4 weeks (other PICO), head-to-head studies of different PAP devices or PAP versus control condition, and reporting of at least one relevant outcome of interest.

**Exclusion Criteria:** observational studies (PICO 1, 2, 4-7, 9-11), PAP withdrawal studies, patients with central sleep apnea, obesity hypoventilation, hypoventilation syndromes, major comorbidities, children and adolescents, non-PAP treatment, insufficient treatment duration, no outcomes of interest, or lack of appropriate control group.

### Abbreviations:

AHI – apnea hypopnea index  
APAP – autotitrating positive airway pressure  
BP – blood pressure  
BPAP – bilevel positive airway pressure  
COWAT – controlled oral word association test  
CPAP – continuous positive airway pressure  
CV – cardiovascular  
DBP – diastolic blood pressure  
EQ5D – European quality of life index  
ESS – Epworth sleepiness scale  
FOSQ – functional outcomes of sleep questionnaire  
HADS – health, anxiety, and depression scale  
HF – heart failure  
LVEF – left ventricle ejection fraction  
MPP – modified pressure profile  
MSLT – multiple sleep latency test  
MVA – motor vehicle accident  
MWT – maintenance of wakefulness test  
OSLER – Oxford sleep resistance test  
PAP – positive airway pressure  
PASAT – paced auditory serial addition test  
PICO – Patient, intervention, comparator, outcome  
PSQI – Pittsburgh sleep quality index  
PVT – psychomotor vigilance test  
QSQ – Quebec sleepiness questionnaire

RCTs – randomized controlled trials  
 RDI – respiratory disturbance index  
 SAQLI – sleep apnea quality of life index  
 SBP – systolic blood pressure  
 SF 36 MCS – short form mental component summary score  
 SF-36 PCS – short form physical component summary score  
 SF-36 VS – short form vitality score

## PAP vs. control conditions for the treatment of obstructive sleep apnea in adults

Figure S1. PAP vs. Control Conditions (AHI, events/hr)

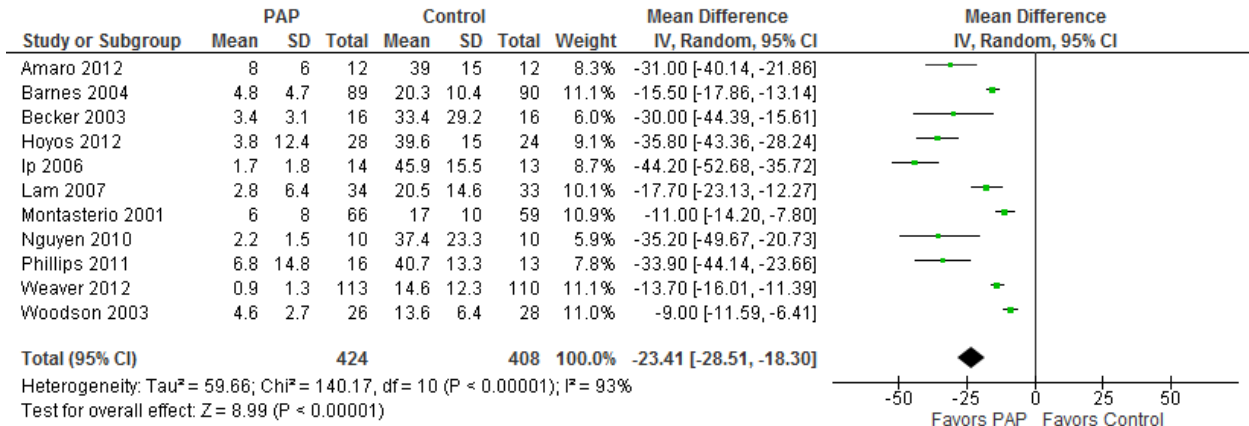

Figure S2. PAP Pre-treatment vs. Post-treatment (AHI, events/hr)

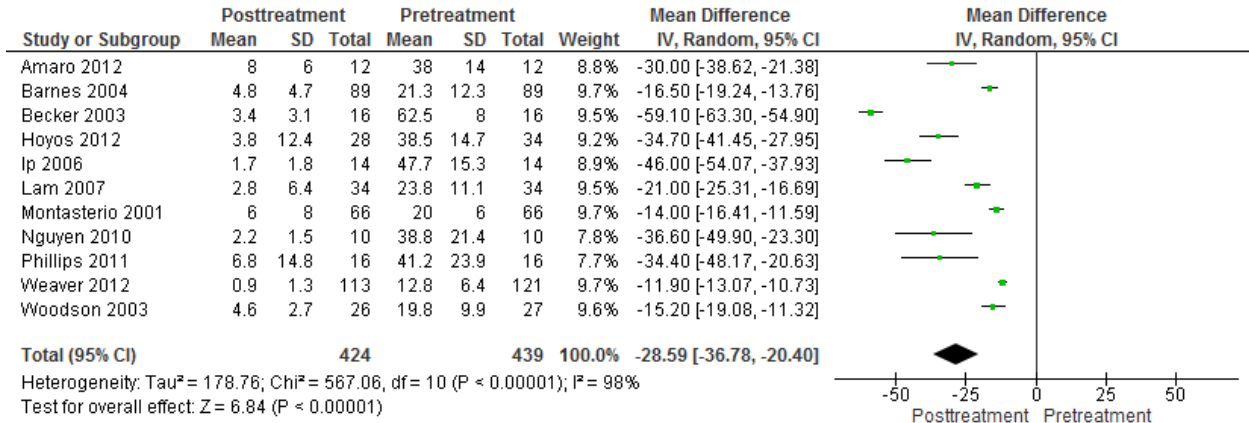

**Figure S3. PAP vs. Control Conditions (ESS)**

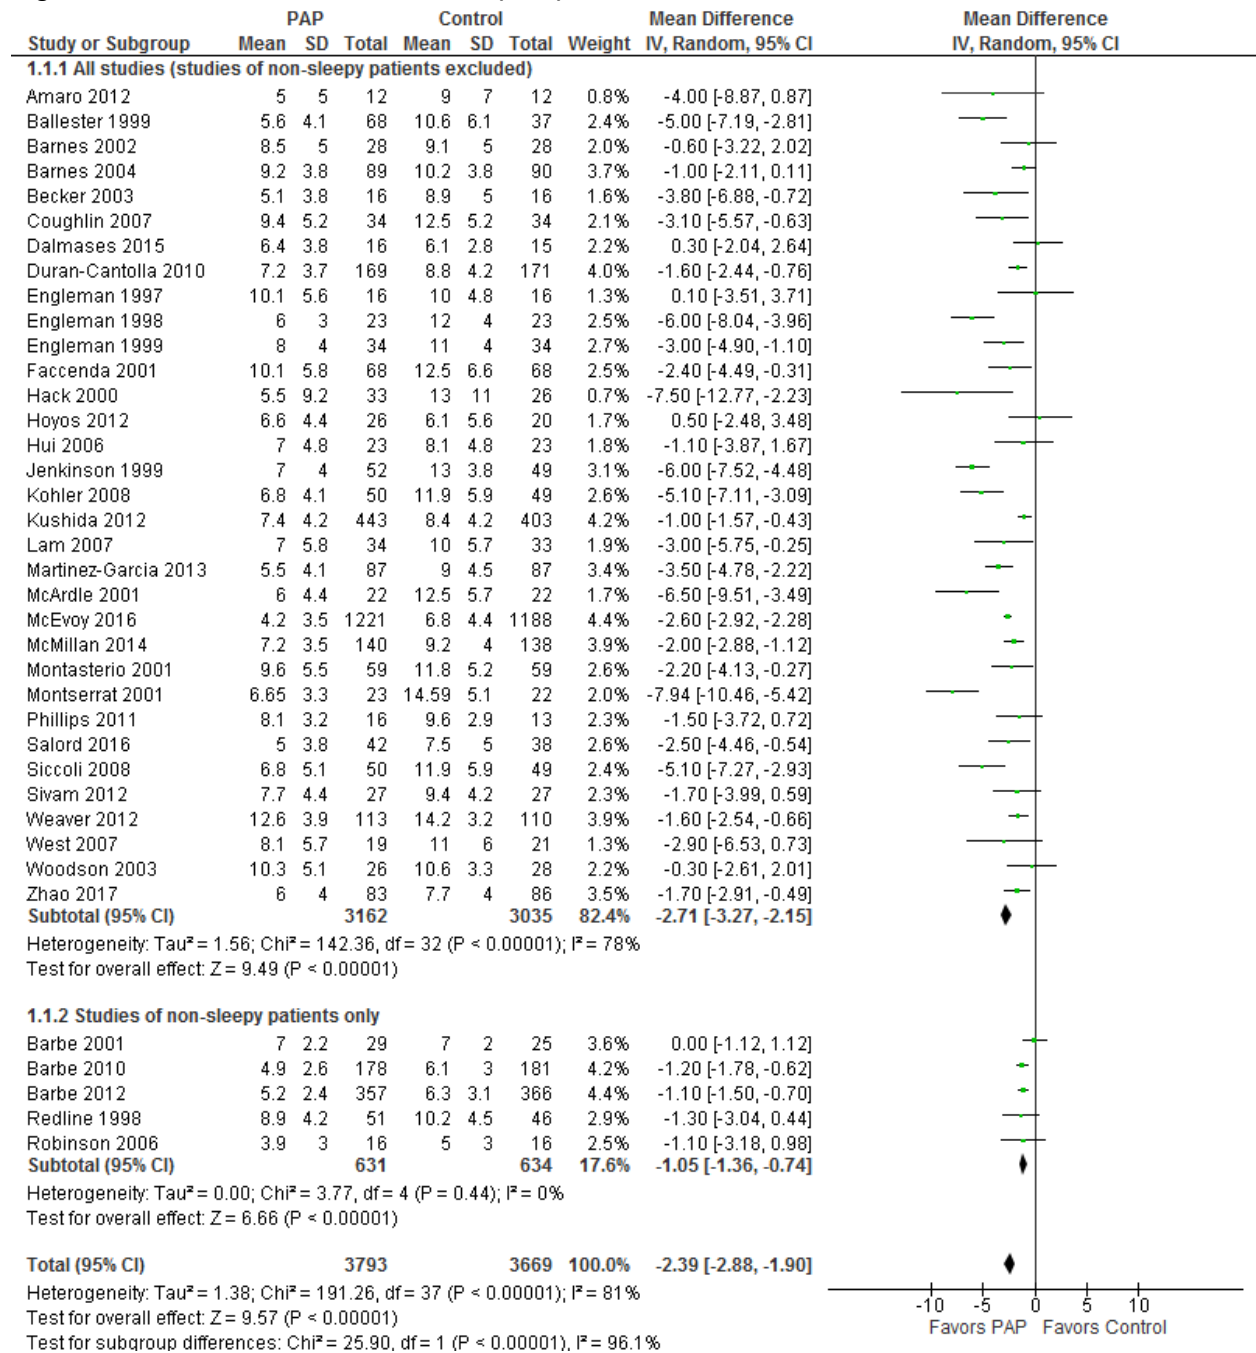

**Figure S4. PAP vs. Control Conditions (Osler & MWT, min)**

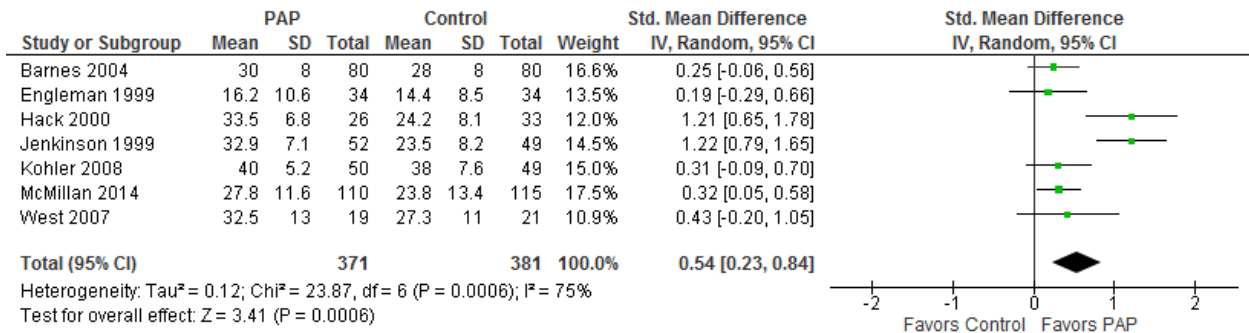

**Figure S5. PAP vs. Control Conditions (MSLT, min)**

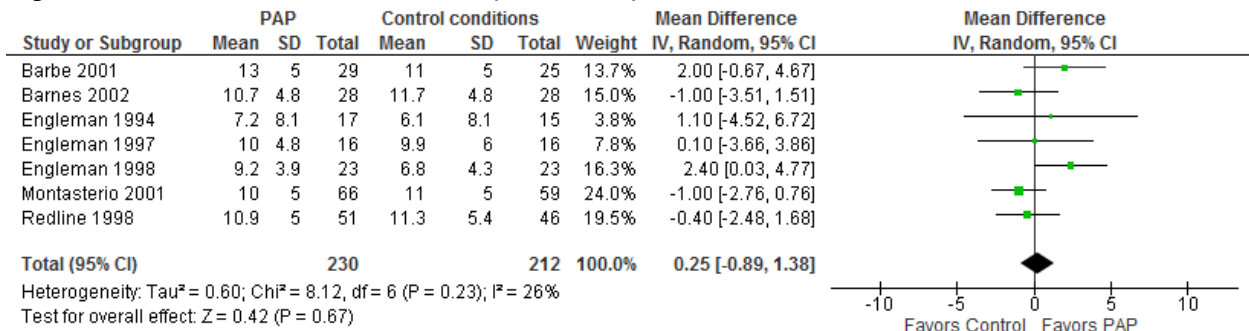

**Figure S6. PAP vs. Control Conditions (FOSQ & SAQLI)**

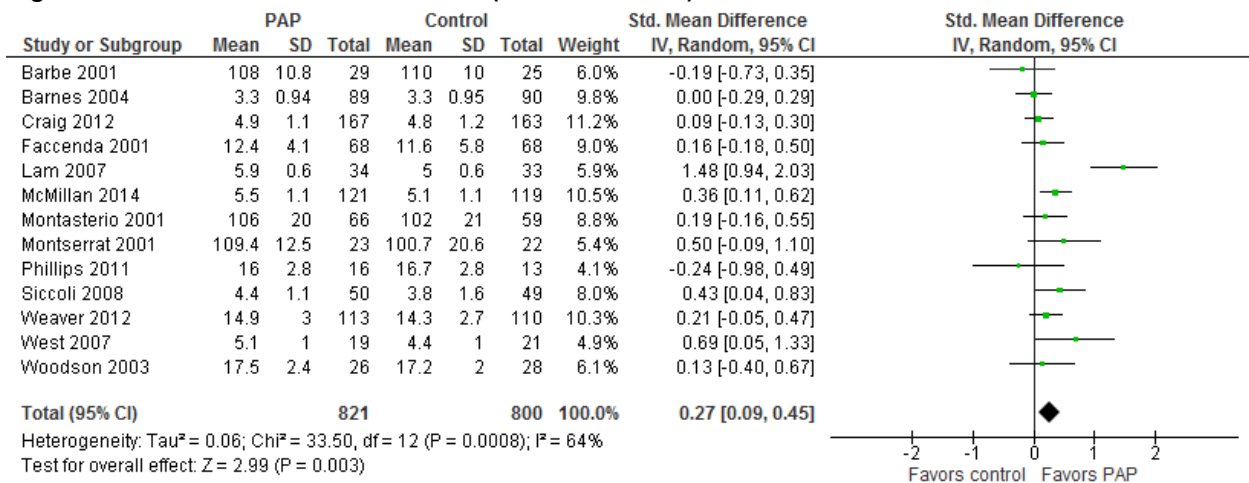

**Figure S7. PAP vs. Control Conditions (SF-36 PCS)**

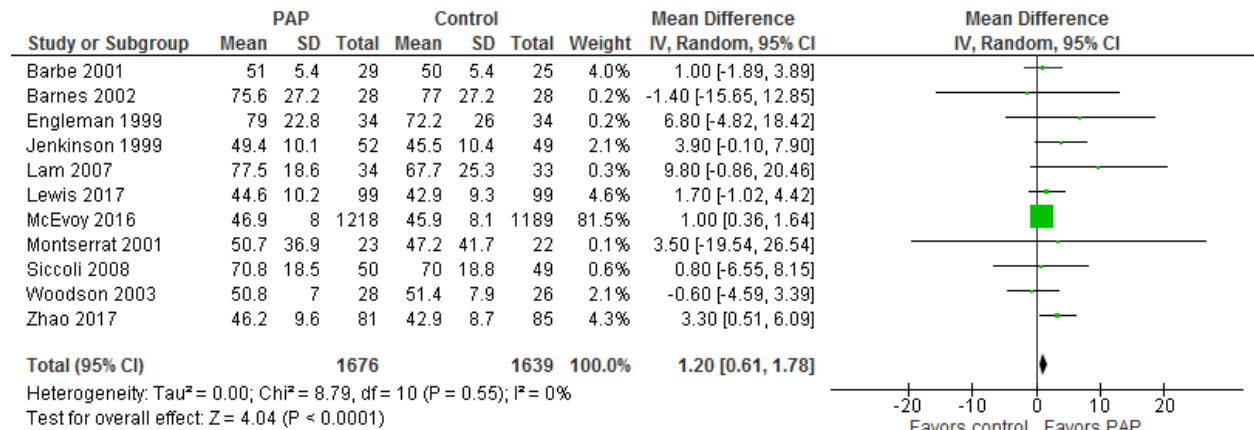

**Figure S8. PAP vs. Control Conditions (SF-36 MCS)**

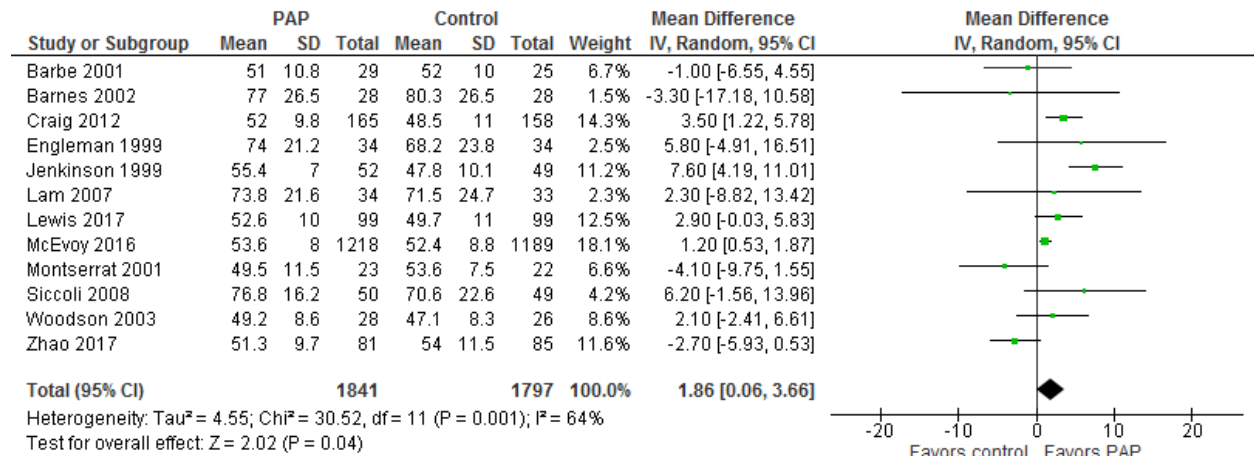

**Figure S9. PAP vs. Control Conditions (SF-36 VS)**

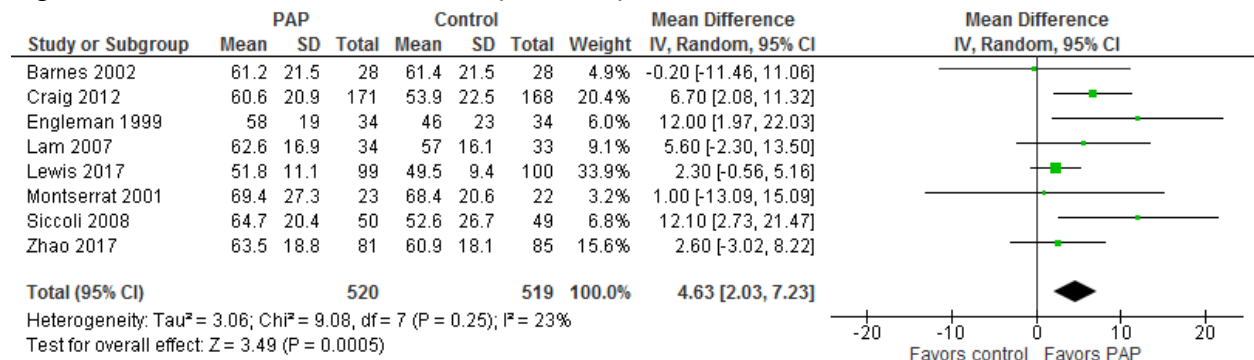

**Figure S10. PAP vs. control conditions (change in nighttime SBP) [All patient types]**

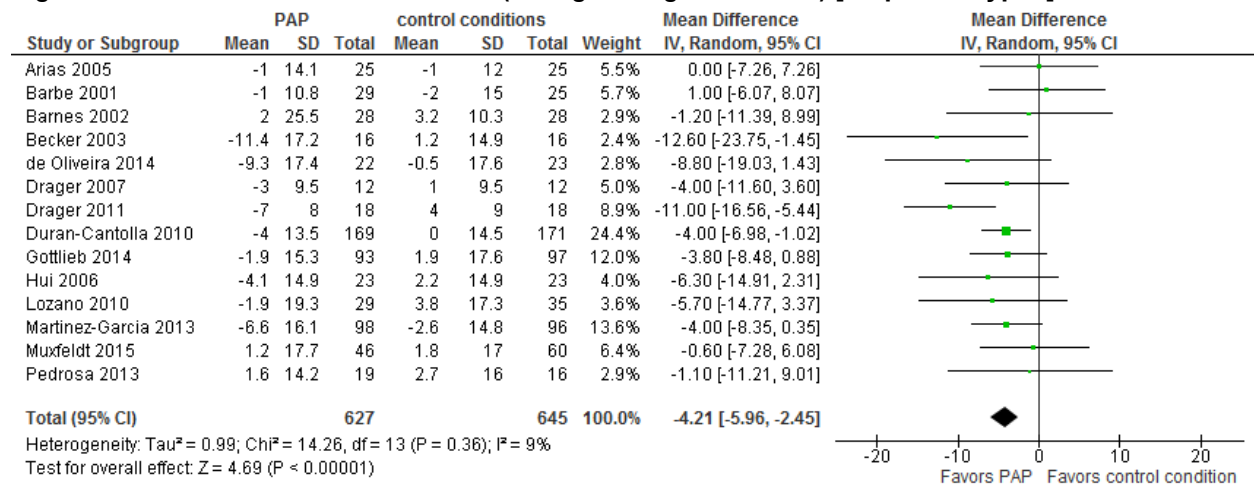

**Figure S11. PAP vs. control conditions (change in nighttime DBP) [All patient types]**

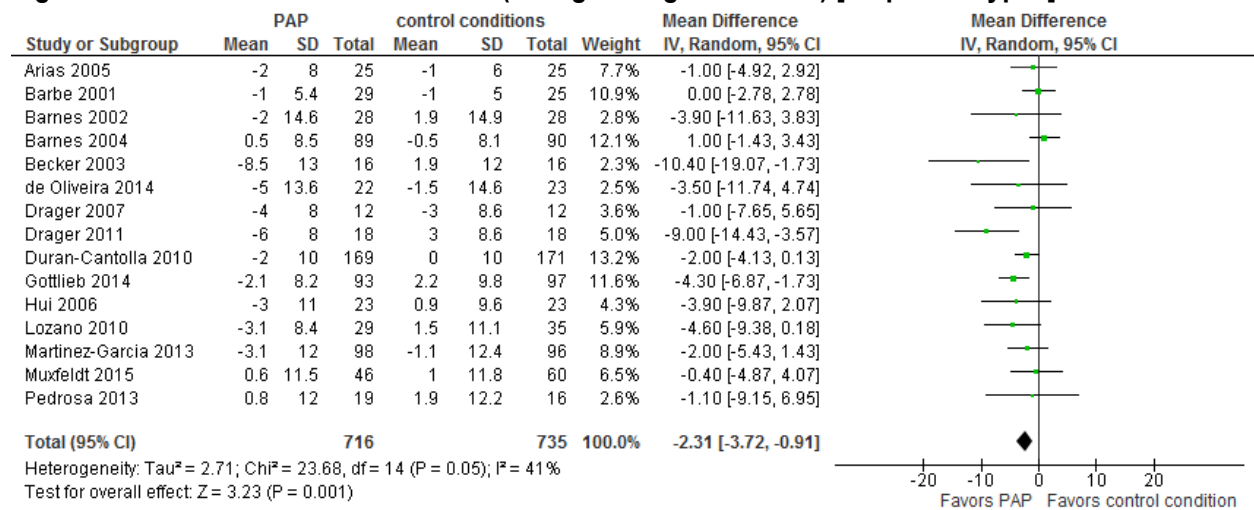

**Figure S12. PAP vs. control conditions (change in daytime SBP) [All patient types]**

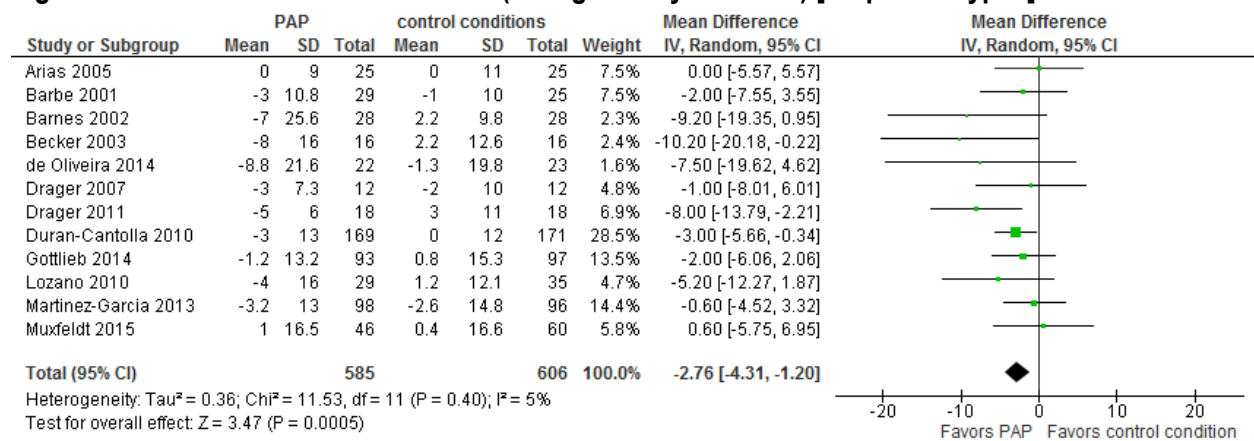

**Figure S13. PAP vs. control conditions (change in daytime DBP) [All patient types]**

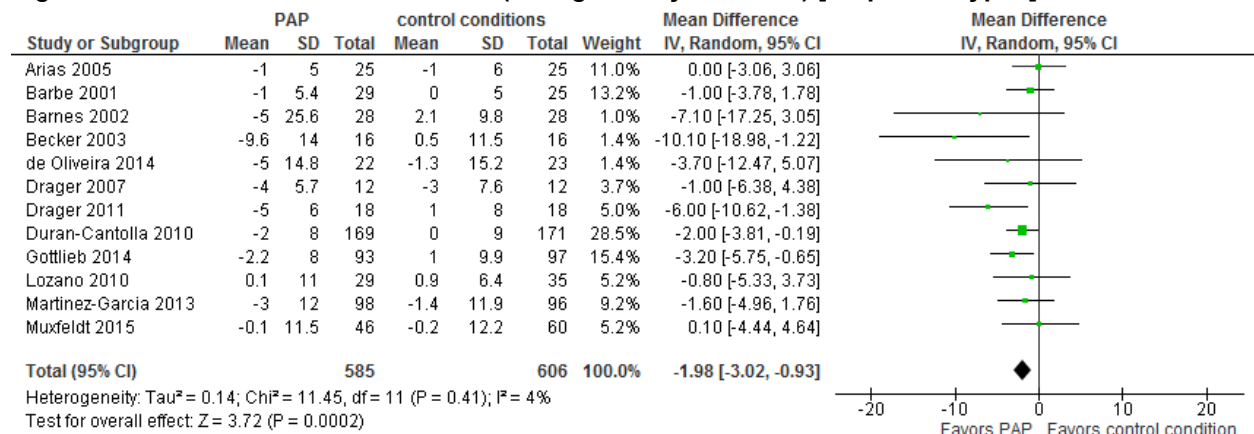

**Figure S14. PAP vs. control conditions (change in 24-hr SBP) [All patient types]**

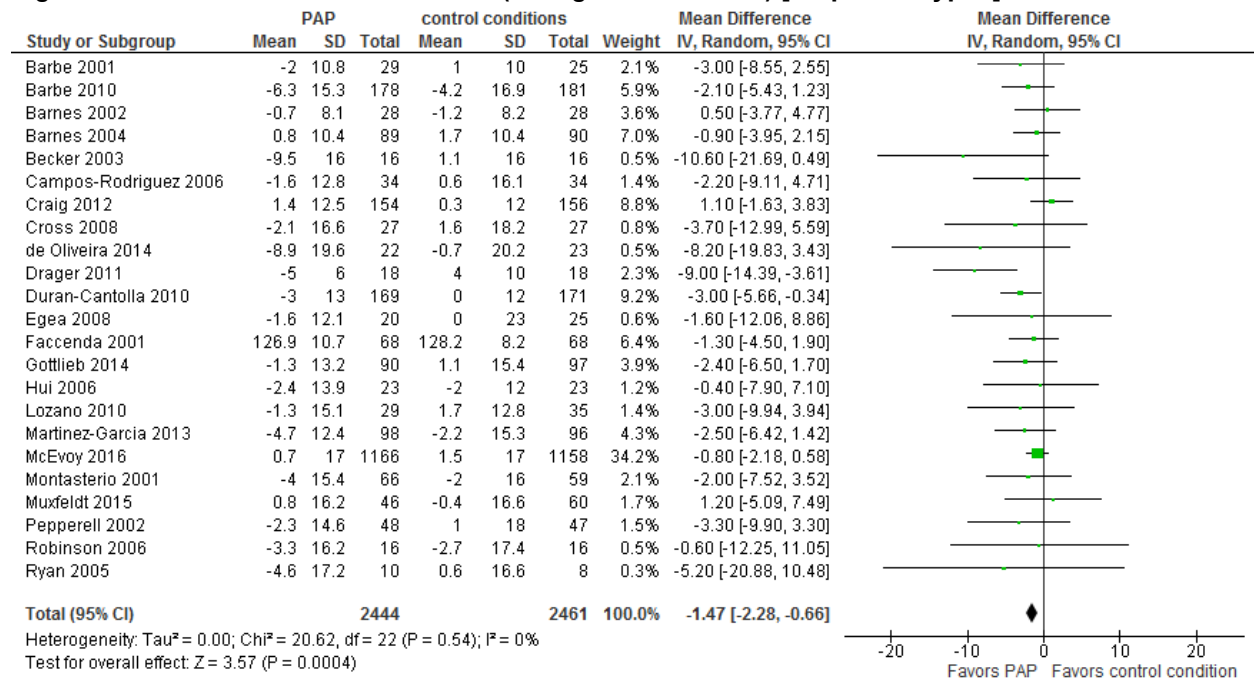

**Figure S15. PAP vs. control conditions (change in 24-hr DBP) [All patient types]\***

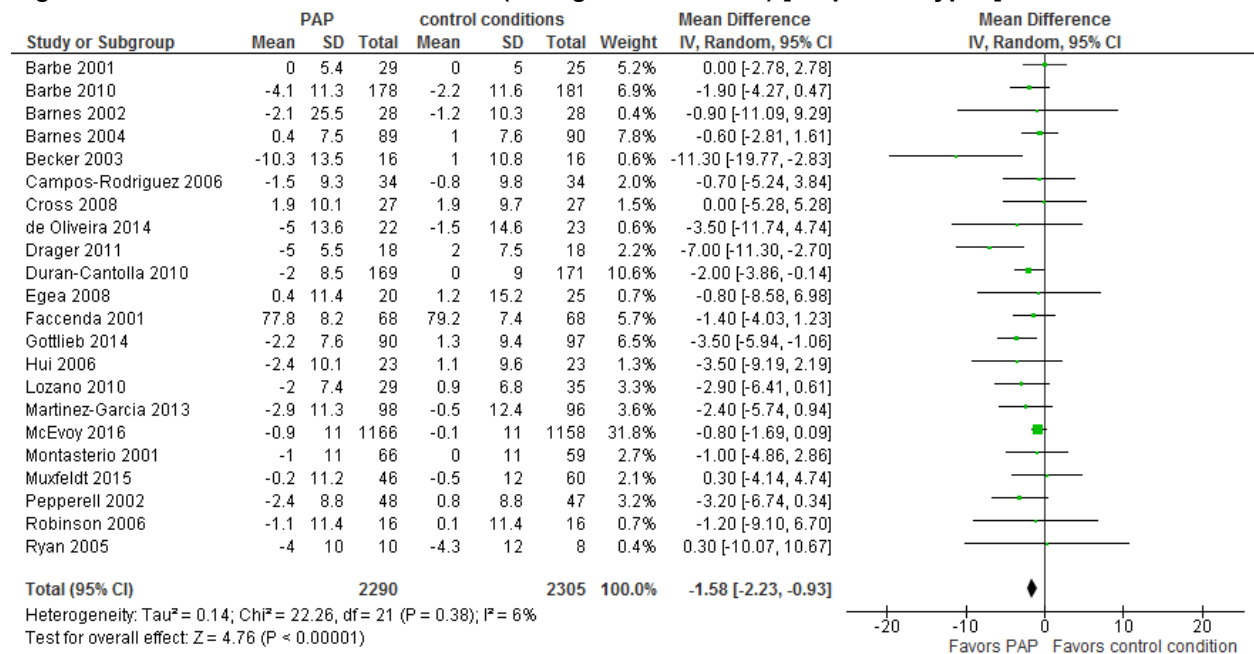

\*Change scores were compared except for Faccenda 2001 in which post-treatment values were compared

**Figure S16. PAP vs. control conditions (change in mean 24-hr BP) [All patient types]**

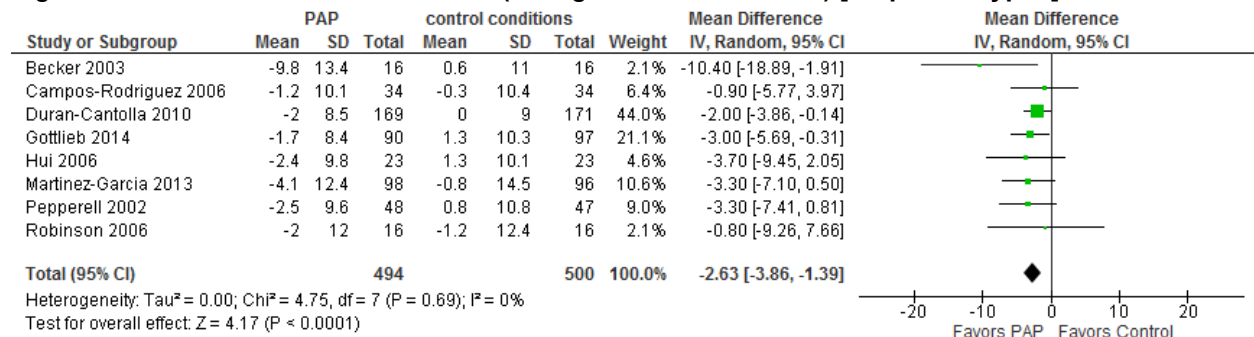

**Figure S17. PAP vs. control conditions (change in nighttime SBP) [Resistant hypertensive patients]**

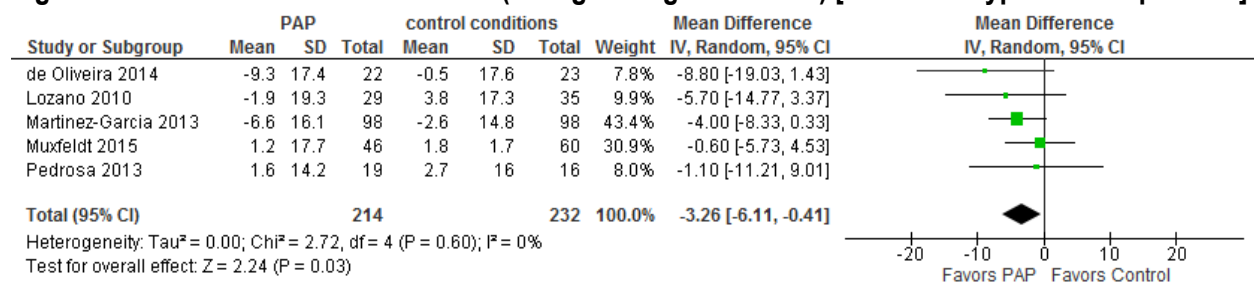



**Figure S18. PAP vs. control conditions (change in nighttime DBP) [Resistant hypertensive patients]**

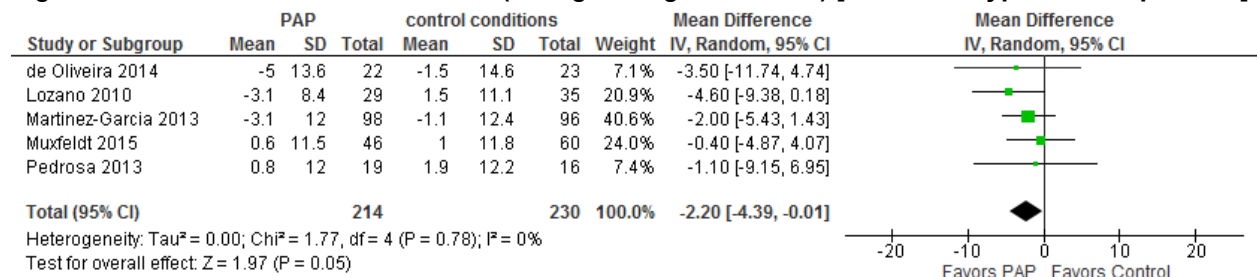

**Figure S19. PAP vs. control conditions (change in daytime SBP) [Resistant hypertensive patients]**

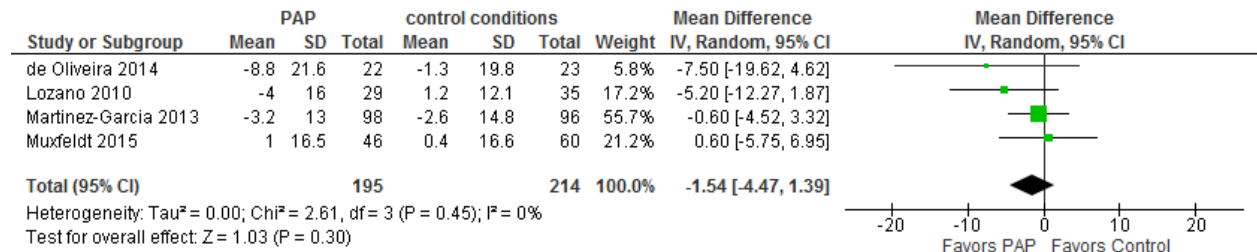

**Figure S20. PAP vs. control conditions (change in daytime DBP) [Resistant hypertensive patients]**

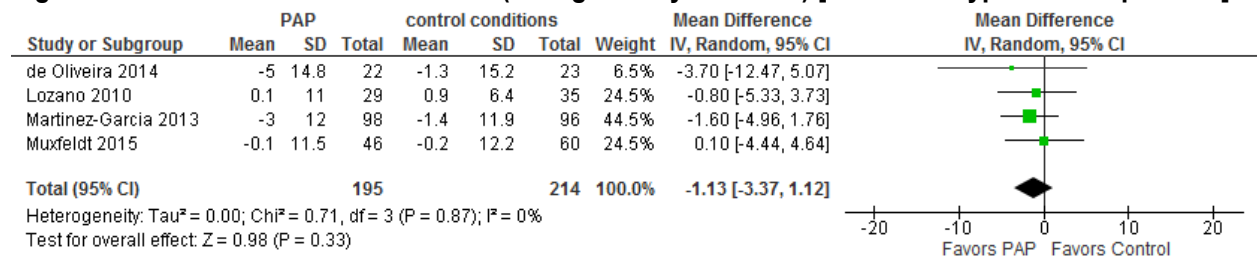

**Figure S21. PAP vs. control conditions (change in 24-hr SBP) [Resistant hypertensive patients]**

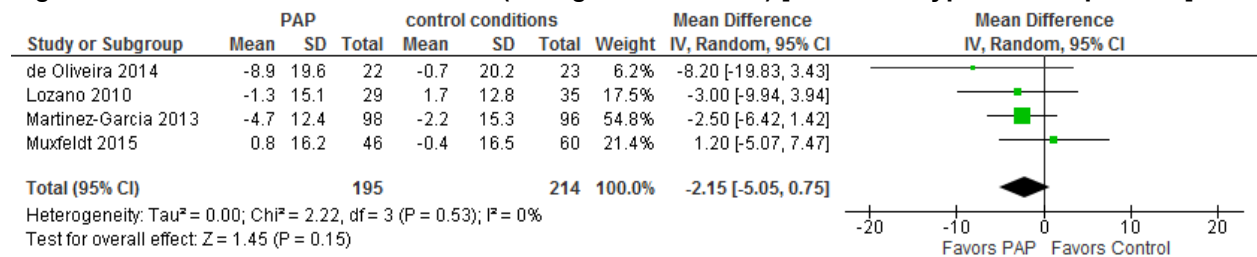

**Figure S22. PAP vs. control conditions (change in 24-hr DBP) [Resistant hypertensive patients]**

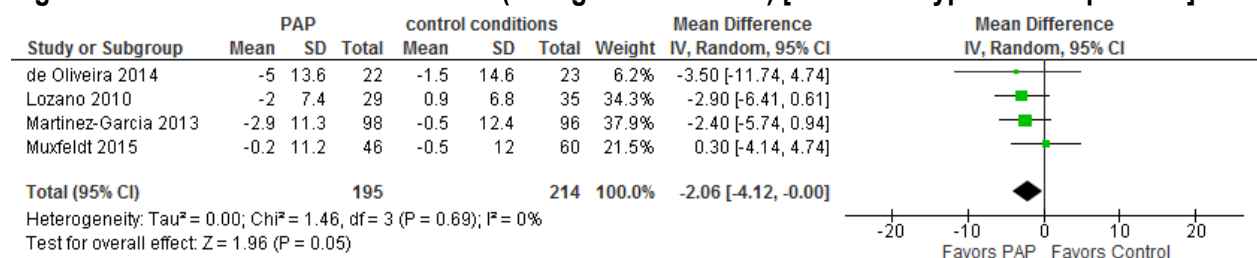

**Figure S23. PAP vs. control conditions (change in nighttime SBP) [Hypertensive patients]**

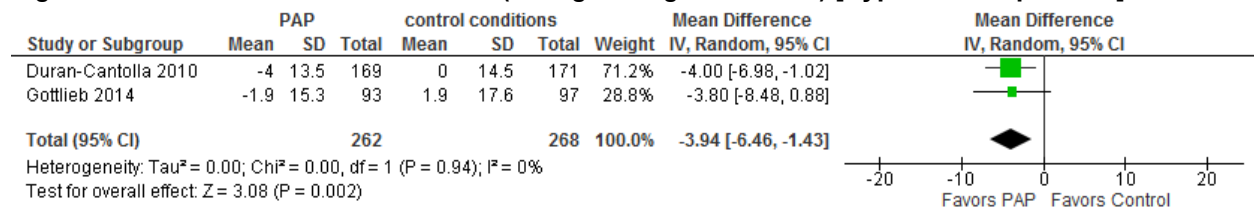

**Figure S24. PAP vs. control conditions (change in nighttime DBP) [Hypertensive patients]**

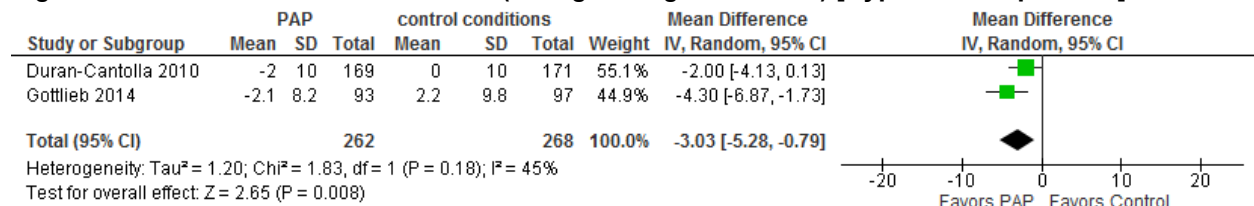

**Figure S25. PAP vs. control conditions (change in daytime SBP) [Hypertensive patients]**

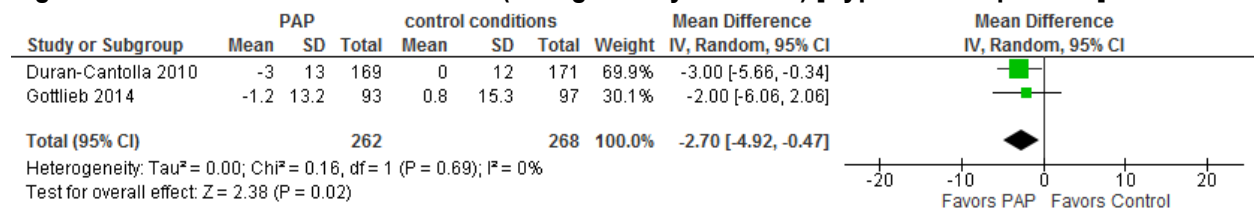

**Figure S26. PAP vs. control conditions (change in daytime DBP) [Hypertensive patients]**

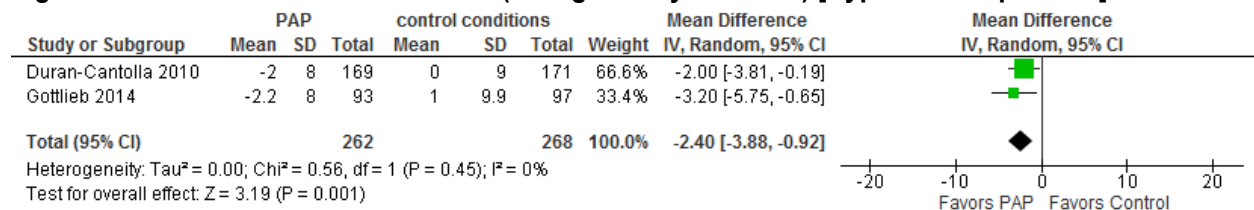

**Figure S27. PAP vs. control conditions (change in 24-hr SBP) [Hypertensive patients]**

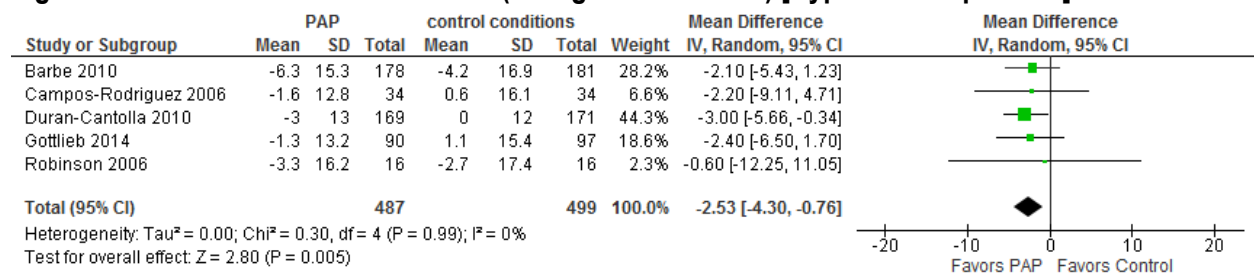

**Figure S28. PAP vs. control conditions (change in 24-hr DBP) [Hypertensive patients]**

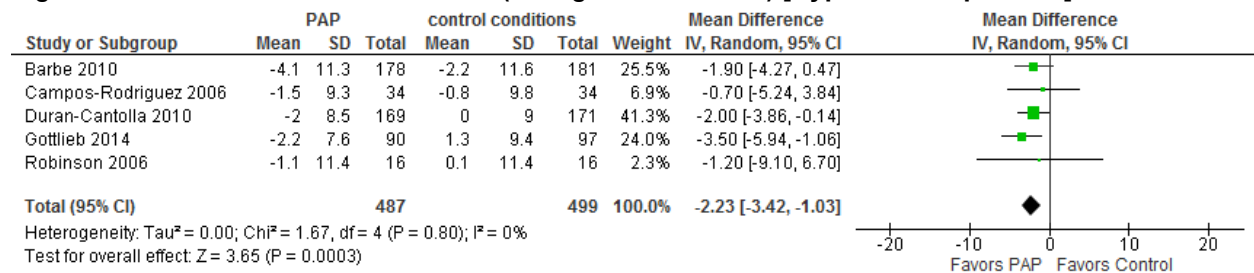

**Figure S29. PAP vs. control conditions (change in mean 24-hr BP) [Hypertensive patients]**

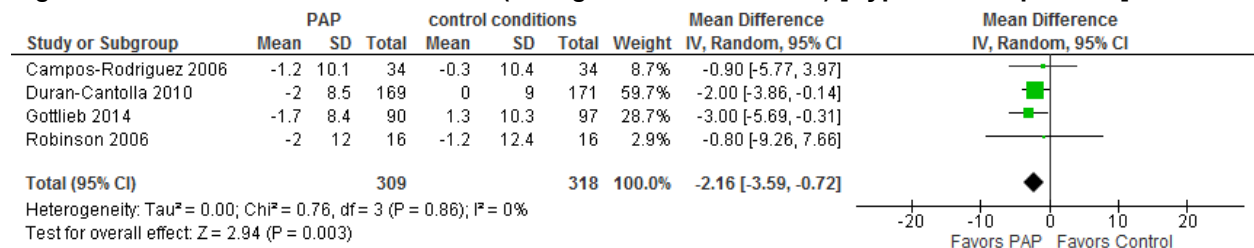

**Figure S30. PAP vs. control conditions (change in nighttime SBP) [Normotensive patients]**

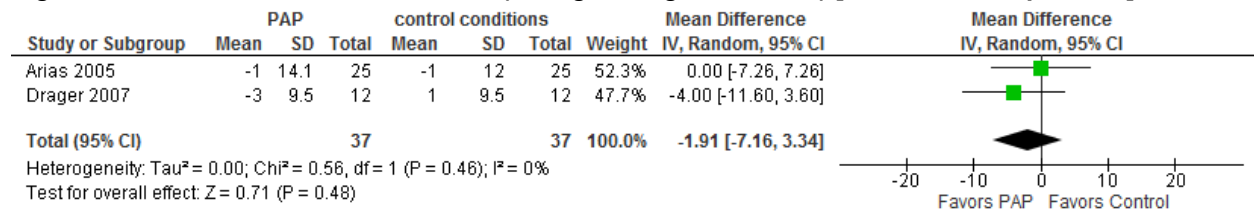

**Figure S31. PAP vs. control conditions (change in nighttime DBP) [Normotensive patients]**

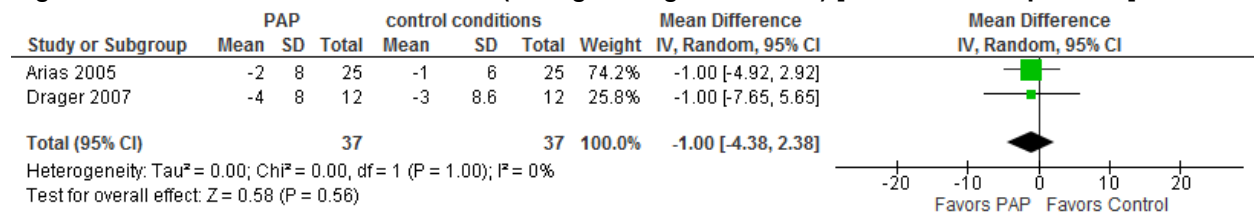

**Figure S32. PAP vs. control conditions (change in daytime SBP) [Normotensive patients]**

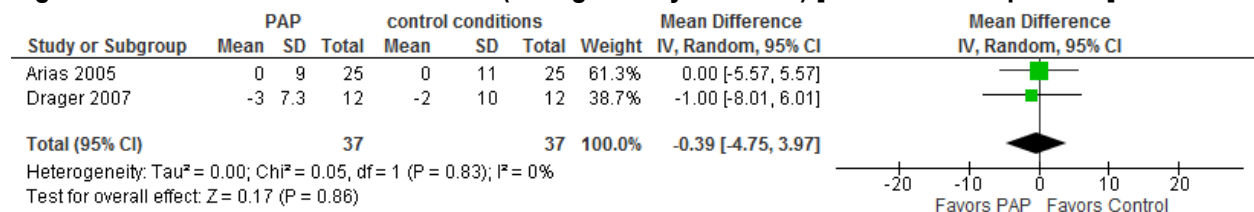

**Figure S33. PAP vs. control conditions (change in daytime DBP) [Normotensive patients]**

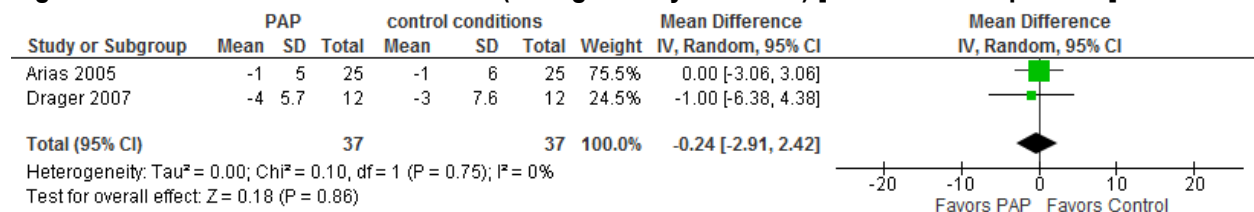

**Figure S34. PAP vs. control conditions (CV events) [RCTs]**

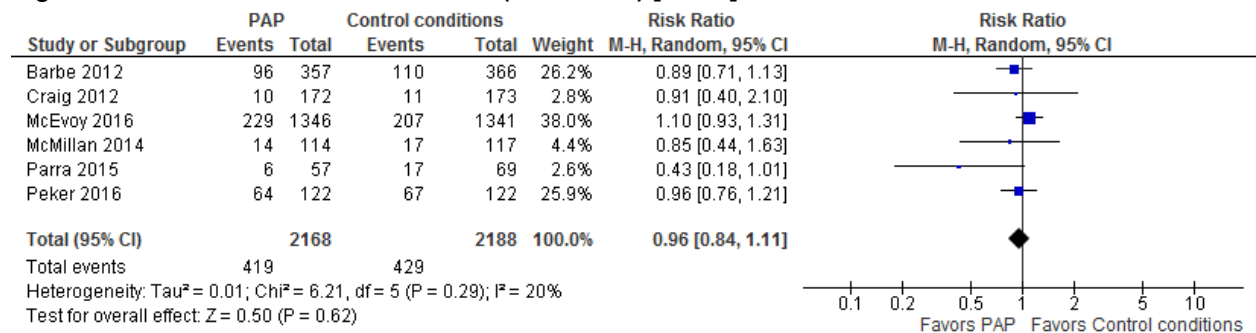

**Figure S35. PAP vs. control conditions (CV events) [non-RCTs]**

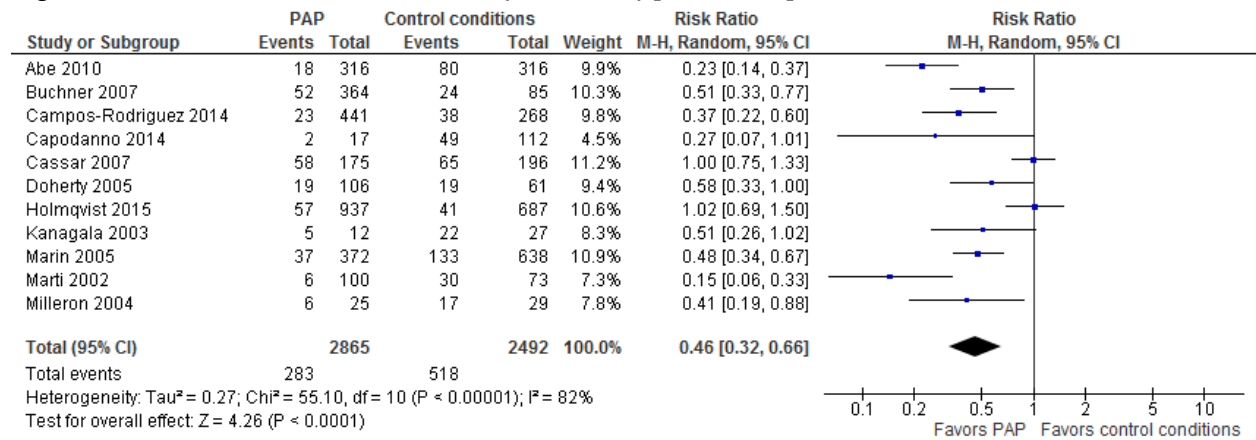

**Figure S36. PAP vs. control conditions (All-cause mortality) [RCTs]**

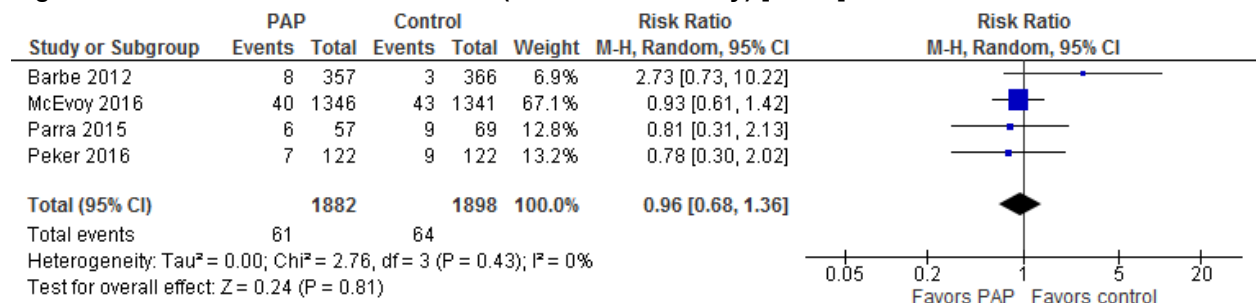

**Figure S37. PAP vs. control conditions (All-cause mortality) [non-RCTs, all patients]**

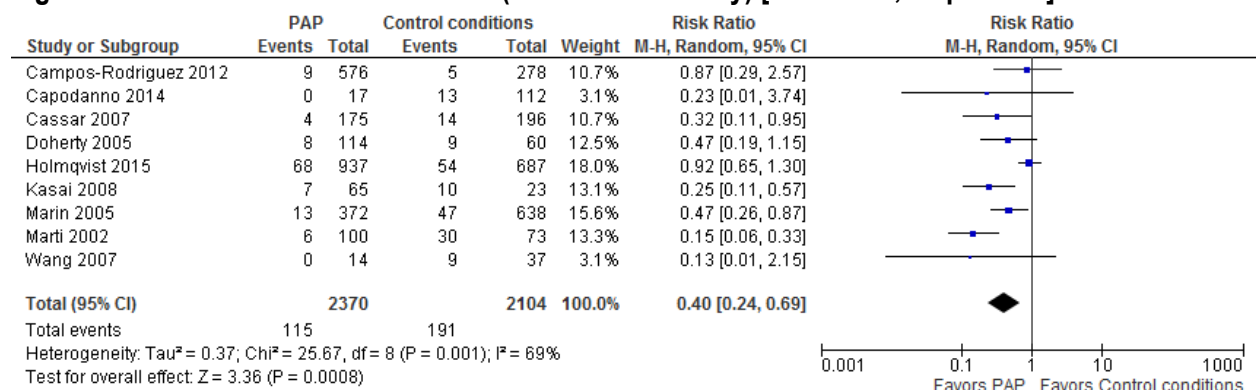

**Figure S38. PAP vs. control conditions (All-cause mortality) [non-RCTs, patients with HF]**

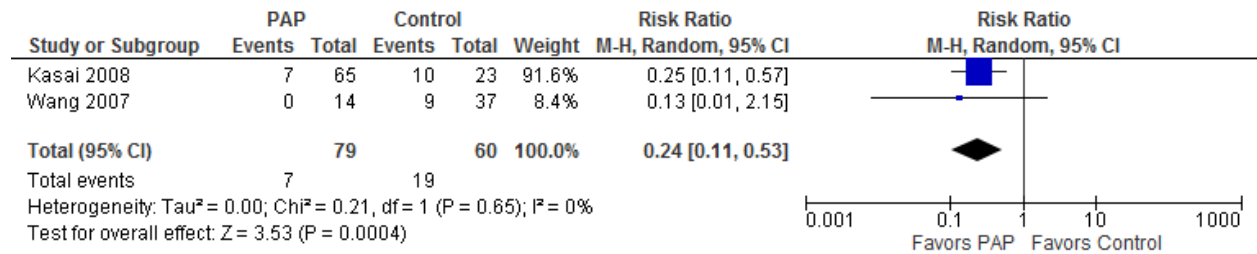

**Figure S39. PAP vs. control conditions (All-cause mortality) [non-RCTs, patients without HF]**

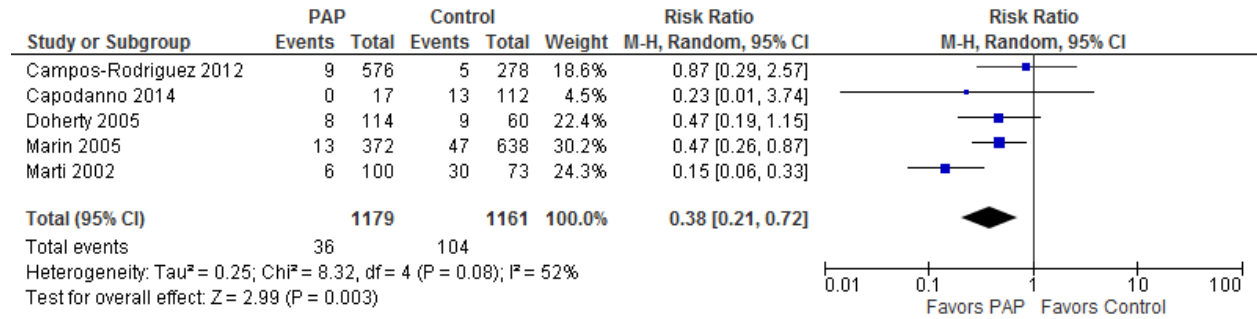

**Figure S40. PAP vs. Control Conditions (change in Executive Function, Shifting)**

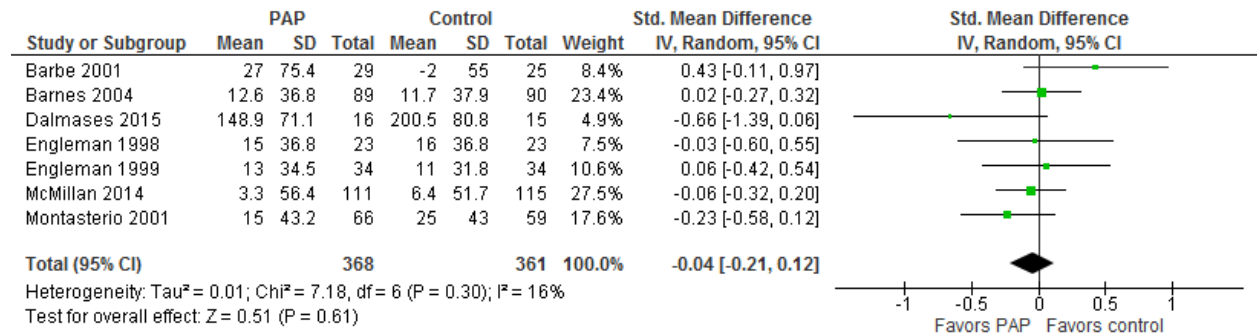

**Figure S41. PAP vs. Control Conditions (change in Executive Function, Updating)**

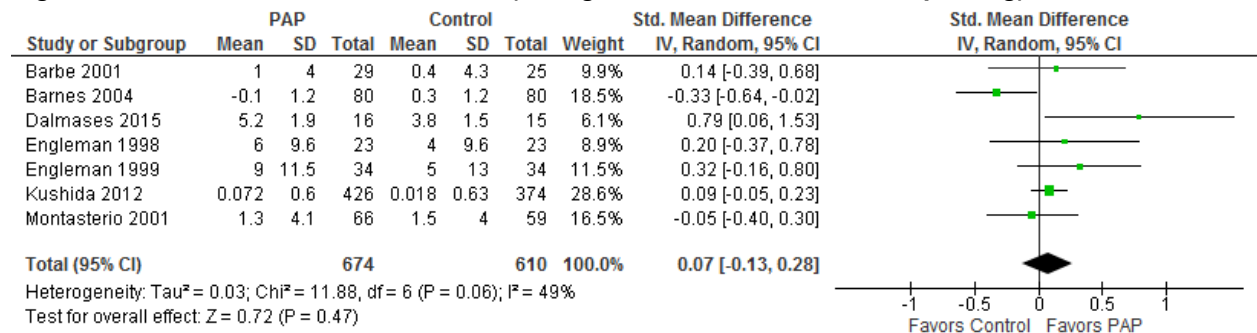

**Figure S42. PAP vs. Control Conditions (change in Executive Function, Fluid Reasoning)**

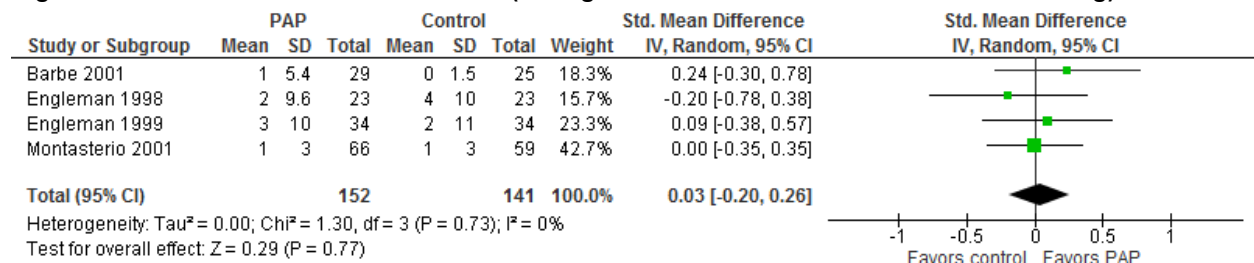

**Figure S43. PAP vs. Control Conditions (change in Processing Speed)**

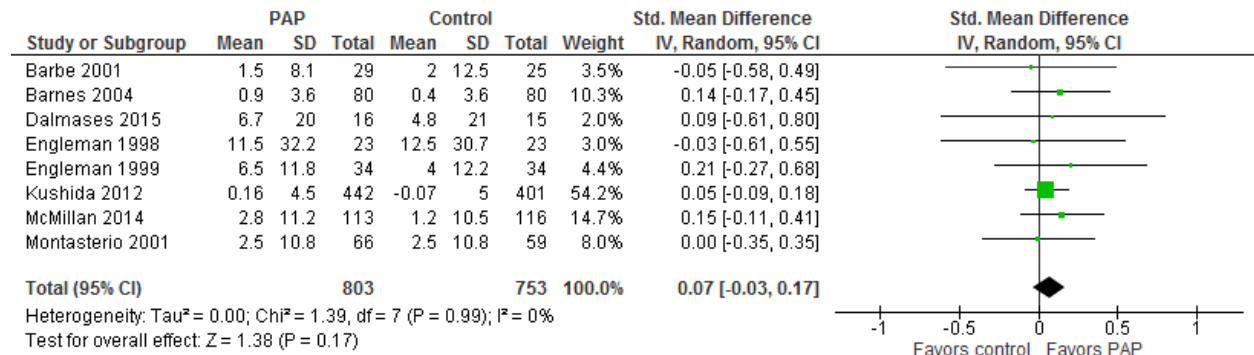

**Figure S44. PAP vs. Control Conditions (change in Attention/Vigilance)**

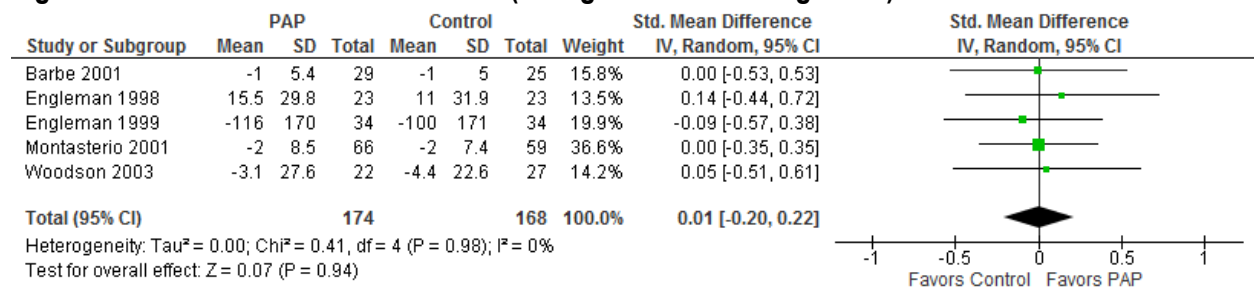

**Figure S45. PAP vs. Control Conditions (change in Memory)**

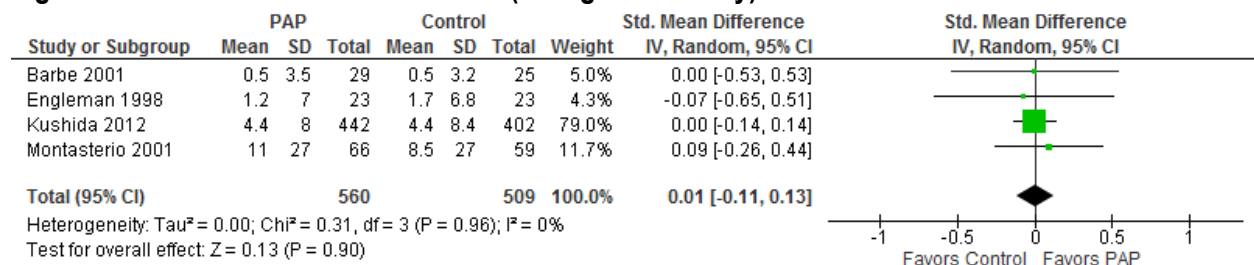

**Figure S46. PAP vs. Control Conditions (change in Intelligence)**

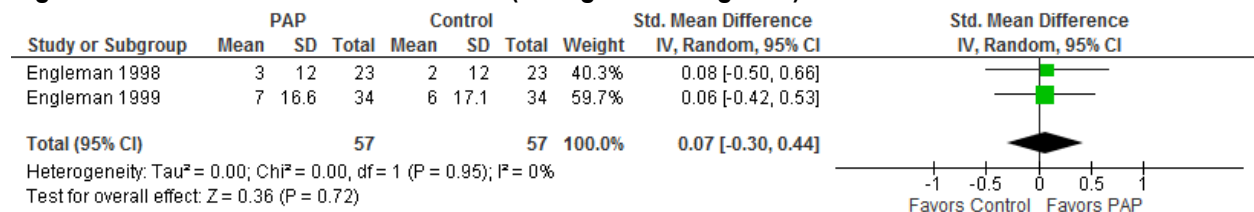

**Figure S47. PAP vs. Control Conditions (HADS Depression)**

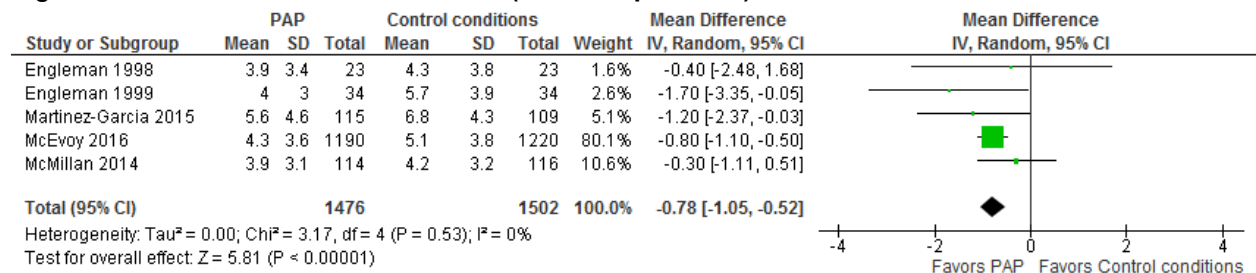

**Figure S48. PAP vs. Control Conditions (HADS Anxiety)**

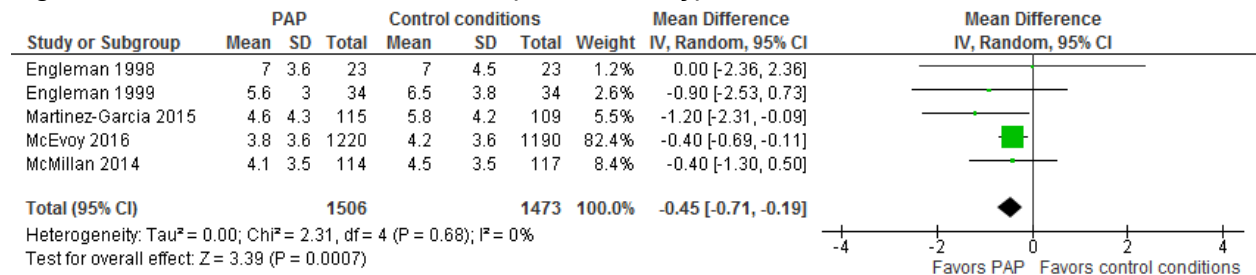

**Figure S49. PAP vs. Control Conditions (change in SteerClear, Obstacles hit)**

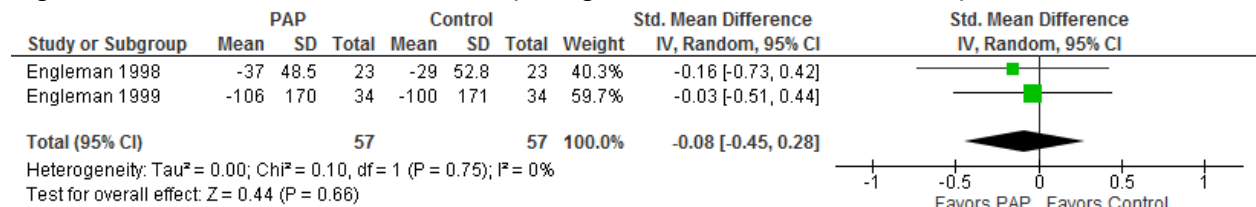

**Figure S50. PAP vs. Control Conditions (change in SteerClear, % Obstacles hit)**

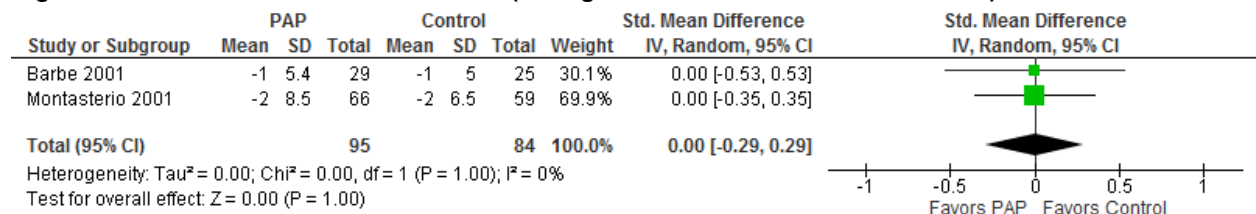

**Figure S51. PAP pre-treatment vs. PAP post-treatment (MVC Risk Ratio)[non-RCTs]**

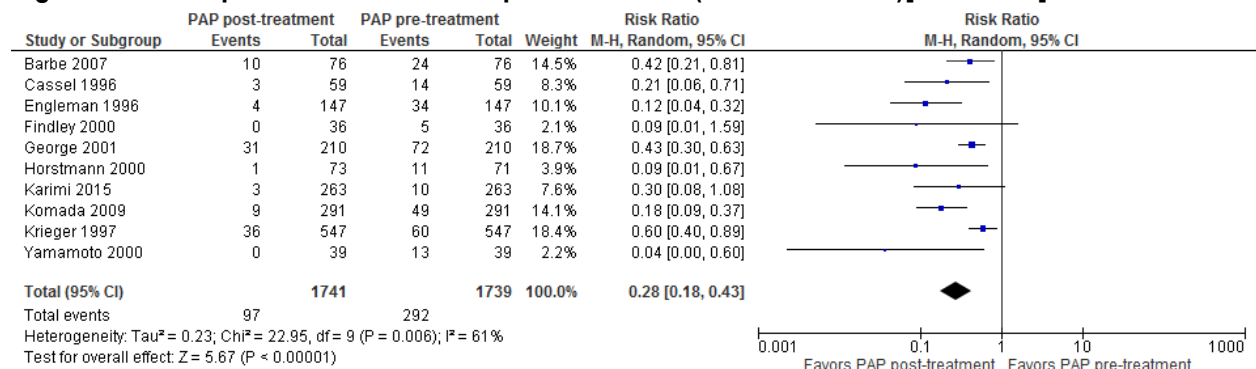

**Figure S52. PAP vs. control conditions (Fasting glucose, mmol/l)**

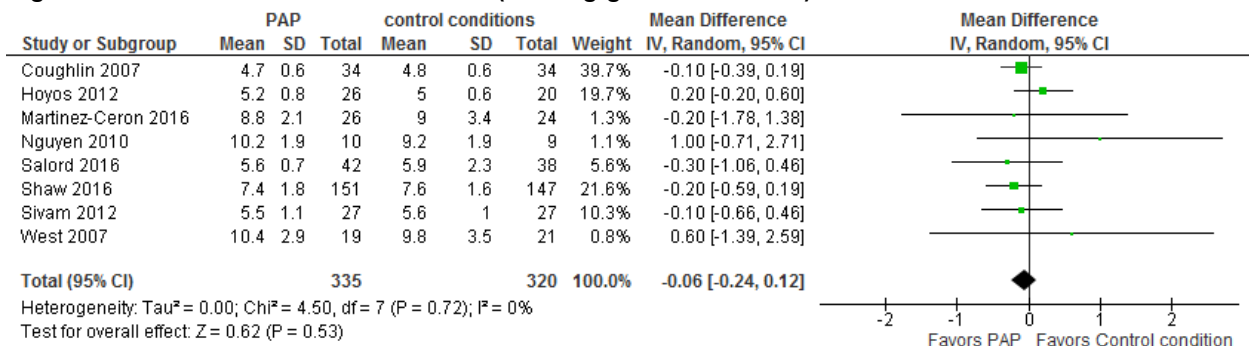

**Figure S53. PAP vs. control conditions (Hemoglobin A1C, %)**

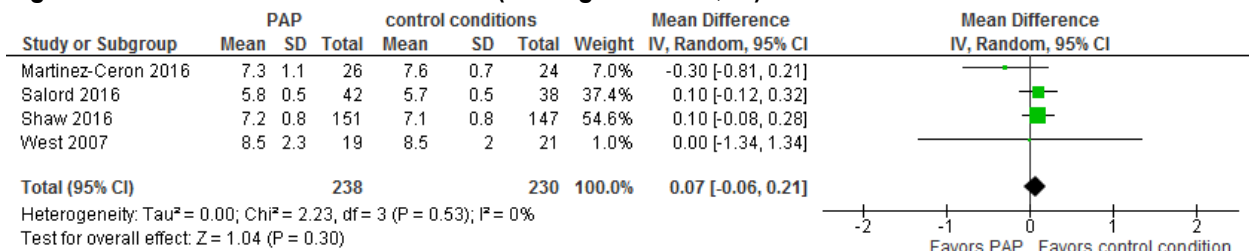

**Figure S54. PAP vs. control conditions (change in LVEF, %) [All patients]**

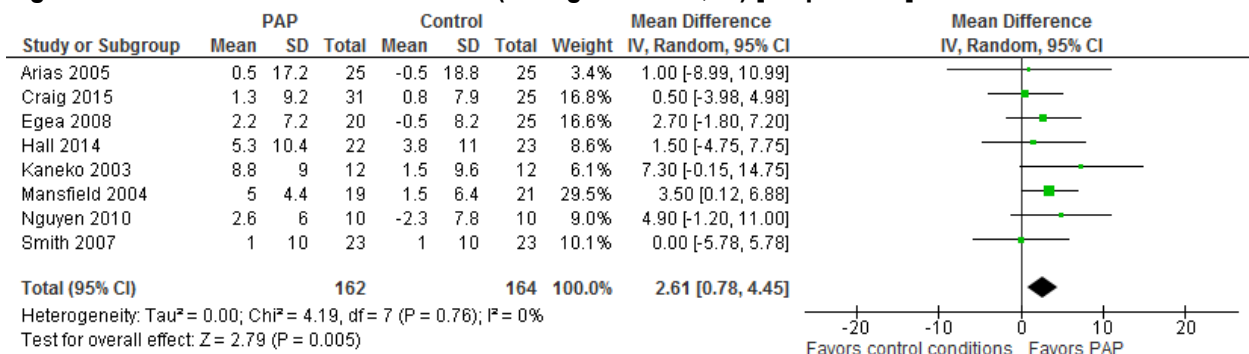

**Figure S55. PAP vs. control conditions (change in LVEF, %) [Patients with HF]**

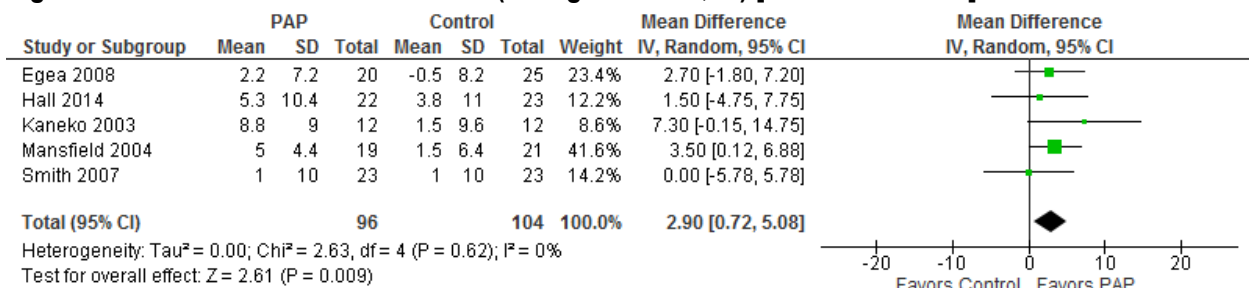



**Figure S56. PAP vs. control conditions (change in LVEF, %) [Patients without HF]**

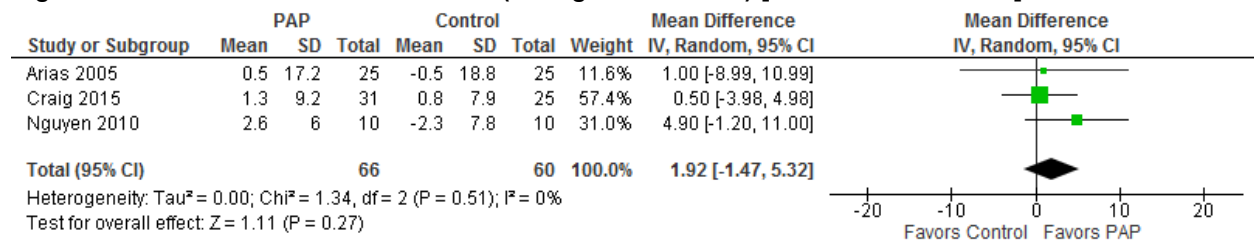

**Figure S57. PAP vs. control conditions (Hospitalization risk ratio) [non-RCTs, all patients]**

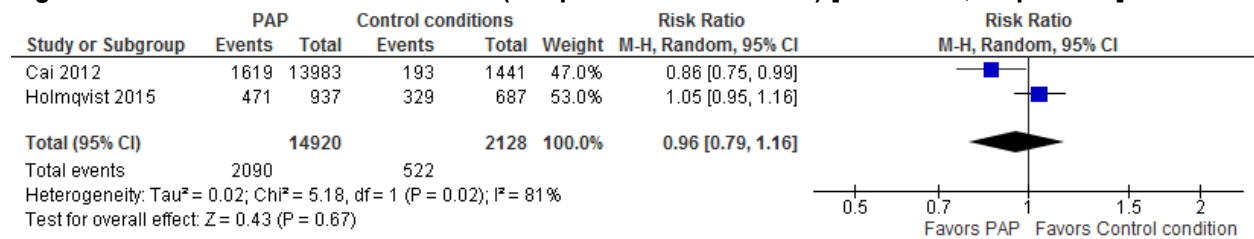

**Table S1. Summary of Findings Table for PAP vs. control conditions for the treatment of obstructive sleep apnea in adults: severity, sleepiness, quality of life, neurocognitive outcomes, mood, and motor vehicle crashes**

**References:** Amaro 2012 (A); Ballester 1999 (B); Barbe 2001 (C); Barbe 2010 (D); Barbe 2012 (E); Barnes 2002 (F); Barnes 2004 (G); Becker 2003 (H); Coughlin 2007 (I); Dalmases 2015 (J); Duran-Cantolla 2010 (K); Engleman 1997 (L); Engleman 1998 (M); Engleman 1999 (N); Faccenda 2001 (O); Hack 2000 (P); Hoyos 2012 (Q); Hui 2006 (R); Jenkinson 1999 (S); Kohler 2008 (T); Kushida 2012 (U); Lam 2007 (V); Martinez-Garcia 2013 (W); McArdle 2001 (X); McEvoy 2016 (Y); McMillan 2014 (Z); Montasterio 2001 (AA); Montserrat 2001 (BB); Phillips 2011 (CC); Redline 1998 (DD); Robinson 2006 (EE); Siccoli 2008 (FF); Weaver 2012 (GG); West 2007 (HH); Woodson 2003 (II); Sivam 2012 (JJ); Ip 2006 (KK); Nguyen 2010 (LL); Craig 2012 (MM); Engleman 1994 (NN); George 2001 (OO); Barbe 2007 (PP); Findley 2000 (QQ); Martinez-Garcia 2015 (RR); Komada 2009 (SS); Cassel 1996 (TT); Engleman 1996 (UU); Horstmann 2000 (VV); Krieger 1997 (WW); Yamamoto 2000 (XX); Karimi 2015 (YY); Zhao 2017 (ZZ); Lewis 2017 (AAA); Salord 2016 (BBB)

| Outcomes                                                   | Quality of the evidence (GRADE) | Anticipated absolute effects (95% CI)<br>MD between PAP and control conditions                                                                                                                                           | No of participants (studies)                         |
|------------------------------------------------------------|---------------------------------|--------------------------------------------------------------------------------------------------------------------------------------------------------------------------------------------------------------------------|------------------------------------------------------|
| AHI (PAP vs Control)                                       | ⊕⊕⊕⊕<br>HIGH                    | The mean AHI of the PAP group was 4.1 (5.7). The mean AHI of the control group was 27.5 (13.9). The mean AHI in the PAP group was 23.4 events/hr lower (28.5 lower to 18.3 lower)                                        | 832<br>(11 RCTs) <sup>A,G,H,Q,V,AA,CC,HH,II,KK</sup> |
| AHI (Pre- vs. Post-PAP)                                    | ⊕⊕⊕⊕<br>HIGH                    | The mean AHI of the pretreatment group was 32.7 (12.6). The mean AHI in the posttreatment group was 4.1 (5.6). The mean difference in AHI before and after treatment was 28.6 events/hr lower (36.8 lower to 20.4 lower) | 863<br>(11 RCTs) <sup>A,G,H,Q,V,AA,CC,HH,II,KK</sup> |
| Self-reported Sleepiness* (ESS) [all patients]             | ⊕⊕⊕○<br>MODERATE <sup>1</sup>   | The mean ESS score in the PAP group was 2.39 lower (2.88 lower to 1.90 lower)                                                                                                                                            | 7462<br>(38 RCTs) <sup>A-JJ,ZZ,BBB</sup>             |
| Self-reported Sleepiness* (ESS) [sleepy patients]          | ⊕⊕⊕⊕<br>HIGH                    | The mean ESS score in the PAP group was 2.71 lower (3.27 lower to 2.15 lower)                                                                                                                                            | 6197 (33 RCTs) <sup>A,B, F-CC, FF-JJ,ZZ,BBB</sup>    |
| Self-reported Sleepiness* (ESS) [non-sleepy patients only] | ⊕⊕⊕○<br>MODERATE <sup>1</sup>   | The mean sleepiness (ESS) in the PAP group was 1.05 lower (1.36 lower to 0.74 lower)                                                                                                                                     | 1265 (5 RCTs) <sup>C-E, DD, EE</sup>                 |
| Objective Sleepiness* (Osler, MWT)                         | ⊕⊕⊕⊕<br>HIGH                    | The mean Osler/MWT sleep latency in the PAP group was 0.54 standard deviations lower (0.23 lower to 0.84 lower)                                                                                                          | 752 (7 RCTs) <sup>G,N,P,S,T,Z,HH</sup>               |
| Objective Sleepiness* (MSLT)                               | ⊕⊕⊕○<br>MODERATE <sup>1</sup>   | The mean MSLT sleep latency in the PAP group was 0.25 minutes lower (1.38 lower to 0.89 higher)                                                                                                                          | 442 (7 RCTs) <sup>D,F,I,LM,AA,DD,NN</sup>            |
| Sleep-related QOL* (FOSQ, SAQLI)                           | ⊕⊕⊕○<br>MODERATE <sup>1</sup>   | The mean FOSQ/SAQLI in the PAP group was 0.27 standard deviations higher (0.09 higher to 0.45 higher)                                                                                                                    | 1621 (13 RCTs) <sup>C,G,O,V,Z,AA-CC,FF-II,MM</sup>   |

|                                                                               |                               |                                                                                                                                |                                                            |
|-------------------------------------------------------------------------------|-------------------------------|--------------------------------------------------------------------------------------------------------------------------------|------------------------------------------------------------|
| QOL*<br>(SF-12/SF-36 Physical Component Summary)                              | ⊕⊕⊕⊕<br>HIGH                  | The mean SF-36 Physical Summary Score in the PAP group was 1.20 higher (0.61 higher to 1.78 higher)                            | 3315<br>(11 RCTs) <sup>C,F,N,S,V,Y,BB,FF,II,ZZ,AAA</sup>   |
| QOL*<br>(SF-12/SF-36 Mental Component Summary)                                | ⊕⊕⊕○<br>MODERATE <sup>1</sup> | The mean SF-36 Mental Summary Score in the PAP group was 1.86 higher (0.06 higher to 3.66 higher)                              | 3638<br>(12 RCTs) <sup>C,F,M,N,S,V,Y,BB,FF,MM,ZZ,AAA</sup> |
| QOL*<br>(SF-36 Vitality Score)                                                | ⊕⊕⊕⊕<br>HIGH                  | The mean SF-36 Vitality Score in the PAP group was 4.63 higher (2.03 higher to 7.23 higher)                                    | 674<br>(8 RCTs) <sup>F,N,V,BB,FF,MM,ZZ,AAA</sup>           |
| Execution Function<br>(Shifting)                                              | ⊕⊕⊕○<br>MODERATE <sup>1</sup> | The mean Shifting Score in the PAP group was 0.04 standard deviations lower (0.21 fewer to 0.12 greater)                       | 729<br>(7 RCTs) <sup>C,G,J,M,N,ZAA</sup>                   |
| Executive Function<br>(Updating)                                              | ⊕⊕⊕○<br>MODERATE <sup>1</sup> | The mean Updating Score in the PAP group was 0.07 standard deviations higher (0.13 lower to 0.28 higher)                       | 1284<br>(7 RCTs) <sup>C,G,J,M,N,U,AA</sup>                 |
| Executive Function<br>(Fluid Reasoning)                                       | ⊕⊕⊕○<br>MODERATE <sup>1</sup> | The mean Fluid Reasoning Score in the PAP group was 0.03 standard deviations greater (0.20 fewer to 0.26 greater)              | 293<br>(4 RCTs) <sup>C,M,N,AA</sup>                        |
| Processing Speed                                                              | ⊕⊕⊕⊕<br>HIGH                  | The mean processing speed in the PAP group was 0.07 standard deviations greater (0.03 lower to 0.17 greater)                   | 1556<br>(8 RCTs) <sup>C,G,J,M,U,ZAA</sup>                  |
| Attention/Vigilance                                                           | ⊕⊕⊕⊕<br>HIGH                  | The mean attention/vigilance in the PAP group was 0.01 standard deviations higher (0.20 fewer to 0.22 greater)                 | 342<br>(5 RCTs) <sup>C,M,N,AA,II</sup>                     |
| Memory                                                                        | ⊕⊕⊕⊕<br>HIGH                  | The mean memory in the PAP group was 0.01 standard deviations higher (0.13 higher to 0.11 lower)                               | 1069<br>(4 RCTs) <sup>C,M,U,AA</sup>                       |
| Intelligence                                                                  | ⊕⊕○○<br>LOW <sup>1</sup>      | The mean intelligence in the PAP group was 0.07 standard deviations greater (0.3 fewer to 0.44 greater)                        | 114<br>(2 RCTs) <sup>M,N</sup>                             |
| Depression<br>(HADS)                                                          | ⊕⊕⊕⊕<br>HIGH                  | The mean HADS Depression Score in the PAP group was 0.78 lower (1.05 lower to 0.52 lower)                                      | 2978<br>(5 RCTs) <sup>M,N,Y,Z,RR</sup>                     |
| Anxiety<br>(HADS)                                                             | ⊕⊕⊕⊕<br>HIGH                  | The mean HADS Anxiety Score in the PAP group was 0.45 lower (0.71 lower to 0.19 lower)                                         | 2979<br>(5 RCTs) <sup>M,N,Y,Z,RR</sup>                     |
| Driving Proficiency<br>(SteerClear, Obstacles hit)                            | ⊕⊕⊕○<br>MODERATE <sup>1</sup> | The mean SteerClear Obstacles Hit score in the PAP group was 0.08 standard deviations higher (0.45 higher to 0.28 lower)       | 114<br>(2 RCTs) <sup>M,N</sup>                             |
| Driving Proficiency<br>(SteerClear, % Obstacles hit)                          | ⊕⊕⊕○<br>MODERATE <sup>1</sup> | The mean SteerClear % Obstacles Hit score in the PAP group was 0.00 standard deviations different (0.29 greater to 0.29 lower) | 179<br>(2 RCTs) <sup>C,AA</sup>                            |
| Motor vehicle crash rate risk ratio<br>(PAP pre-treatment vs. post-treatment) | ⊕⊕○○<br>LOW                   | The mean crash rate risk ratio in the PAP group was 0.28 (0.18 to 0.43)                                                        | 3480 (10 observational studies) <sup>OO-QQ,SS-YY</sup>     |

\*Critical Outcomes

<sup>1</sup>Quality of evidence was downgraded due to imprecision (i.e., 95% CI of mean difference crosses clinical decision threshold and/or small sample size)

**Table S2. Summary of Findings Table for PAP vs. control conditions for the treatment of obstructive sleep apnea in adults: blood pressure and glycemia**

**References:** Arias 2005 (A); Barbe 2001 (B); Barnes 2002 (C); Becker 2003 (D); Drager 2007 (E); Drager 2011 (F); Duran-Cantolla 2010 (G); Hui 2006 (H); Lozano 2010 (I); Martinez-Garcia 2013 (J); Muxfeldt 2015 (K); Pedrosa (L); Barnes 2004 (M); Barbe 2010 (N); Campos-Rodriguez 2006 (O); Craig 2012 (P); Cross 2008 (Q); Egea 2008 (R); McEvoy 2016 (S); Montasterio 2001 (T); Pepperell 2002 (U); Robinson 2006 (V); Ryan 2005 (W); Coughlin 2007 (X); Hoyos 2012 (Y); Nguyen 2010 (Z); Sivam 2012 (AA); West 2007 (BB); Faccenda 2001 (CC); Martinez-Ceron 2016 (DD); Shaw 2016 (EE); de Oliveira 2014 (FF); Gottlieb 2014 (GG); Salord 2016 (HH)

| Outcomes                              | Quality of the evidence (GRADE) | Anticipated absolute effects (95% CI)<br>MD between PAP and control conditions                 | № of participants (studies)            |
|---------------------------------------|---------------------------------|------------------------------------------------------------------------------------------------|----------------------------------------|
| Nighttime systolic BP* (all patients) | ⊕⊕⊕○<br>MODERATE <sup>1</sup>   | The mean nighttime systolic BP in the PAP group was 4.21mm Hg lower (5.96 lower to 2.45 lower) | 1272<br>(14 RCTs) <sup>A-L,FF,GG</sup> |

|                                                           |                    |                                                                                                  |                                                         |
|-----------------------------------------------------------|--------------------|--------------------------------------------------------------------------------------------------|---------------------------------------------------------|
| Nighttime diastolic BP* (all patients)                    | ⊕⊕⊕○<br>MODERATE 1 | The mean nighttime diastolic BP in the PAP group was 2.31 mm Hg lower (3.72 lower to 0.91 lower) | 1451<br>(15 RCTs) <sup>A-L,M,FF,GG</sup>                |
| Daytime systolic BP* (all patients)                       | ⊕⊕⊕○<br>MODERATE 1 | The mean daytime systolic BP in the PAP group was 2.76 mm Hg lower (4.31 lower to 1.20 lower)    | 1191<br>(12 RCTs) <sup>A-G,I-K,FF,GG</sup>              |
| Daytime diastolic BP* (all patients)                      | ⊕⊕⊕○<br>MODERATE 1 | The mean daytime diastolic BP in the PAP group was 1.98 mm Hg lower (2.88 lower to 0.92 lower)   | 1191<br>(12 RCTs) <sup>A-G,I-K,FF,GG</sup>              |
| 24-hr systolic BP* (all patients)                         | ⊕⊕⊕○<br>MODERATE 1 | The mean 24-hr systolic BP in the PAP group was 1.47 mm Hg lower (2.28 lower to 0.66 lower)      | 4905<br>(23 RCTs) <sup>B-D,F,K,M-O,T-W,CC,FF,GG</sup>   |
| 24-hr diastolic BP* (all patients)                        | ⊕⊕⊕○<br>MODERATE 1 | The mean 24-hr diastolic BP in the PAP group was 1.58 mm Hg lower (2.23 lower to 0.93 lower)     | 4595<br>(22 RCTs) <sup>B-D,F,G-K,M-O,Q-X,CC,FF,GG</sup> |
| 24-hr mean BP* (all patients)                             | ⊕⊕⊕⊕<br>HIGH       | The mean 24-hr mean BP in the PAP group was 2.63 mm Hg lower (3.86 lower to 1.39 lower)          | 994 (8 RCTs) <sup>D,G,H,I,O,U,V,FF</sup>                |
| Nighttime systolic BP* (resistant hypertensive patients)  | ⊕⊕⊕○<br>MODERATE 1 | The mean nighttime systolic BP in the PAP group was 3.26 mm Hg lower (6.11 lower to 0.41 lower)  | 446 (5 RCTs) <sup>I-L,FF</sup>                          |
| Nighttime diastolic BP* (resistant hypertensive patients) | ⊕⊕⊕○<br>MODERATE 1 | The mean nighttime diastolic BP in the PAP group was 2.20 mm Hg lower (4.39 lower to 0.01 lower) | 444 (5 RCTs) <sup>I-L,FF</sup>                          |
| Daytime systolic BP* (resistant hypertensive patients)    | ⊕⊕⊕○<br>MODERATE 1 | The mean daytime systolic BP in the PAP group was 1.54 mm Hg lower (4.47 lower to 1.39 higher)   | 409 (4 RCTs) <sup>I-K,FF</sup>                          |
| Daytime diastolic BP* (resistant hypertensive patients)   | ⊕⊕⊕○<br>MODERATE 1 | The mean daytime diastolic BP in the PAP group was 1.13 mm Hg lower (3.37 lower to 1.12 higher)  | 409 (4 RCTs) <sup>I-K,FF</sup>                          |
| 24-hr systolic BP* (resistant hypertensive patients)      | ⊕⊕⊕○<br>MODERATE 1 | The mean 24-hr systolic BP in the PAP group was 2.15 mm Hg lower (5.05 lower to 0.75 higher)     | 409 (4 RCTs) <sup>I-K,FF</sup>                          |
| 24-hr diastolic BP* (resistant hypertensive patients)     | ⊕⊕⊕○<br>MODERATE 1 | The mean 24-hr diastolic BP in the PAP group was 2.06 mm Hg lower (4.12 lower to 0.00 lower)     | 409 (4 RCTs) <sup>I-K,FF</sup>                          |
| 24-hr mean BP* (resistant hypertensive patients)          | ⊕⊕○○<br>LOW 1      | The mean 24-hr mean BP in the PAP group was 3.30 mm Hg lower (7.10 lower to 0.50 higher)         | 194 (1 RCT) <sup>J</sup>                                |
| Nighttime systolic BP* (hypertensive patients)            | ⊕⊕⊕○<br>MODERATE 1 | The mean nighttime systolic BP in the PAP group was 3.94 mm Hg lower (6.46 lower to 1.43 lower)  | 530 (2 RCTs) <sup>G,GG</sup>                            |
| Nighttime diastolic BP* (hypertensive patients)           | ⊕⊕⊕○<br>MODERATE 1 | The mean nighttime diastolic BP in the PAP group was 3.03 mm Hg lower (5.28 lower to 0.79 lower) | 530 (2 RCTs) <sup>G,GG</sup>                            |
| Daytime systolic BP* (hypertensive patients)              | ⊕⊕⊕○<br>MODERATE 1 | The mean daytime systolic BP in the PAP group was 2.70 mm Hg lower (4.92 lower to 0.47 lower)    | 530 (2 RCTs) <sup>G,GG</sup>                            |
| Daytime diastolic BP* (hypertensive patients)             | ⊕⊕⊕○<br>MODERATE 1 | The mean daytime diastolic BP in the PAP group was 2.40 mm Hg lower (3.88 lower to 0.92 lower)   | 530 (2 RCTs) <sup>G,GG</sup>                            |
| 24-hr systolic BP* (hypertensive patients)                | ⊕⊕⊕○<br>MODERATE 1 | The mean 24-hr systolic BP in the PAP group was 2.53 mm Hg lower (4.30 lower to 0.76 lower)      | 986 (5 RCTs) <sup>G,N,O,V,GG</sup>                      |
| 24-hr diastolic BP* (hypertensive patients)               | ⊕⊕⊕○<br>MODERATE 1 | The mean 24-hr diastolic BP in the PAP group was 2.23 mm Hg lower (3.42 lower to 1.03 lower)     | 986 (5 RCTs) <sup>G,N,O,V,GG</sup>                      |
| 24-hr mean BP* (hypertensive patients)                    | ⊕⊕⊕○<br>MODERATE 1 | The mean 24-hr mean BP in the PAP group was 2.16 mm Hg lower (3.59 lower to 0.72 lower)          | 627 (4 RCTs) <sup>G,O,W,GG</sup>                        |
| Nighttime systolic BP* (normotensive patients)            | ⊕⊕○○<br>LOW 1      | The mean nighttime systolic BP in the PAP group was 1.91 mm Hg lower (7.16 lower to 3.34 higher) | 74 (2 RCTs) <sup>A,E</sup>                              |

|                                                    |                          |                                                                                                    |                                               |
|----------------------------------------------------|--------------------------|----------------------------------------------------------------------------------------------------|-----------------------------------------------|
| Nighttime diastolic BP*<br>(normotensive patients) | ⊕⊕○○<br>LOW <sup>1</sup> | The mean nighttime diastolic BP in the PAP group was 1.00 lower<br>(4.38 lower to 2.38 higher)     | 74 (2 RCTs) <sup>A,E</sup>                    |
| Daytime systolic BP*<br>(normotensive patients)    | ⊕⊕○○<br>LOW <sup>1</sup> | The mean daytime systolic BP in the PAP group was 0.39 mm Hg<br>lower (4.75 lower to 3.97 higher)  | 74 (2 RCTs) <sup>A,E</sup>                    |
| Daytime diastolic BP*<br>(normotensive patients)   | ⊕⊕○○<br>LOW <sup>1</sup> | The mean daytime diastolic BP in the PAP group was 0.24 mm Hg<br>lower (2.91 lower to 2.42 higher) | 74 (2 RCTs) <sup>A,E</sup>                    |
| 24-hr systolic BP*<br>(normotensive patients)      | ⊕⊕○○<br>LOW <sup>1</sup> | The mean 24-hr systolic BP in the PAP group was 1.30 mm Hg<br>lower (3.76 lower to 1.16 higher)    | 68 (1 RCT) <sup>CC</sup>                      |
| 24-hr diastolic BP*<br>(normotensive patients)     | ⊕⊕○○<br>LOW <sup>1</sup> | The mean 24-hr diastolic BP in the PAP group was 1.40 mm Hg<br>lower (3.25 lower to 0.45 higher)   | 68 (1 RCT) <sup>CC</sup>                      |
| Fasting glucose*                                   | ⊕⊕⊕⊕<br>HIGH             | The mean fasting glucose in the PAP group was 0.06 mmol/l lower<br>(0.24 lower to 0.12 higher)     | 655<br>(8 RCTs) <sup>X,Z,AA,BB,DD,EE,HH</sup> |
| Hemoglobin A1C                                     | ⊕⊕⊕⊕<br>HIGH             | The mean hemoglobin A1C in the PAP group was 0.07% higher<br>(0.06 lower to 0.21 higher)           | 468<br>(4 RCT) <sup>AA,BB,DD,HH</sup>         |

\*Critical Outcomes

<sup>1</sup>Quality of evidence was downgraded due to imprecision (i.e., 95% CI of mean difference crosses clinical decision threshold and/or small sample size)

**Table S3. Summary of Findings Table for PAP vs. control conditions for the treatment of obstructive sleep apnea in adults : cardiovascular events, hospitalization, and mortality**

**References:** Arias 2005 (A); Craig 2015 (B); Egea 2008 (C); Kaneko 2003 (D); Mansfield 2004 (E); Nguyen 2010 (F); Smith 2007 (G); Usui 2005 (H); Barbe 2012 (I); McEvoy 2016 (J); Peker 2016 (K); Abe 2010 (L); Buchner 2007 (M); Campos-Rodriguez 2014 (N); Capodanno 2014 (O); Cassar 2007 (P); Doherty 2005 (Q); Holmqvist 2015 (R); Kanagala 2003 (S); Kasai 2008 (T); Marin 2005 (U); Marti 2002 (V); Milleron 2004 (W); Wang 2007 (X); Cai 2012 (Y); Hall 2014 (Z); Craig 2012 (AA); McMillan 2014 (BB); Parra 2015 (CC)

| Outcomes                          | Quality of the evidence (GRADE) | Anticipated absolute effects (95% CI) |                                                                                   | № of participants (studies)                           |
|-----------------------------------|---------------------------------|---------------------------------------|-----------------------------------------------------------------------------------|-------------------------------------------------------|
|                                   |                                 | Baseline Risk                         | Comparative risk                                                                  |                                                       |
| LVEF                              | ⊕⊕⊕○<br>MODERATE <sup>1</sup>   | 210 per 1000                          | The mean change in LVEF in the PAP group was 2.61% more (0.78 more to 4.45 more)  | 326<br>(8 RCTs) <sup>A-G,AA</sup>                     |
| LVEF (patients with HF)           | ⊕⊕⊕○<br>MODERATE <sup>1</sup>   | 208 per 1000                          | The mean change in LVEF in the PAP group was 2.90% more (0.72 more to 5.08 more)  | 200<br>(5 RCTs) <sup>C-E,G,AA</sup>                   |
| LVEF (patients without HF)        | ⊕⊕⊕○<br>MODERATE <sup>1</sup>   | 34 per 1000                           | The mean change in LVEF in the PAP group was 1.92% more (1.47 fewer to 5.32 more) | 126<br>(3 RCTs) <sup>A,B,F</sup>                      |
| <b>Relative Effect</b>            |                                 |                                       |                                                                                   |                                                       |
|                                   |                                 | Baseline Risk                         | Comparative risk                                                                  |                                                       |
| Cardiovascular events* (RCTs)     | ⊕⊕⊕○<br>MODERATE <sup>1</sup>   | 210 per 1000                          | <b>201 per 1000</b><br>(177 to 229)<br><br><b>RR 0.96</b><br>(0.84 to 1.11)       | 4356<br>(6 RCTs) <sup>J,L,AA-CC</sup>                 |
| Cardiovascular events* (non-RCTs) | ⊕⊕○○<br>LOW                     | 208 per 1000                          | <b>96 per 1000</b><br>(65 to 128)<br><br><b>RR 0.46</b><br>(0.32 to 0.66)         | 5357<br>(11 observational studies) <sup>L-S,U-W</sup> |
| All-cause mortality* (RCTs)       | ⊕⊕⊕○<br>MODERATE <sup>1</sup>   | 34 per 1000                           | <b>32 per 1000</b><br>(23 to 46)<br><br><b>RR 0.96</b> (0.68 to 1.36)             | 3780 (4 RCTs) <sup>J-K,CC</sup>                       |

|                                                         |                               |              |                                     |                                                        |
|---------------------------------------------------------|-------------------------------|--------------|-------------------------------------|--------------------------------------------------------|
| All-cause mortality*<br>(non-RCTs)                      | ⊕⊕○○<br>LOW                   | 91 per 1000  | <b>36 per 1000</b><br>(22 to 63)    | 4474<br>(9 observational studies) <sup>N,R,T,V,X</sup> |
|                                                         |                               |              | <b>RR 0.40</b> (0.24 to 0.69)       |                                                        |
| All-cause mortality*<br>(non-RCTs, patients with HF)    | ⊕○○○<br>VERY LOW <sup>1</sup> | 317 per 1000 | <b>76 per 1000</b><br>(35 to 168)   | 139<br>(2 observational studies) <sup>T,X</sup>        |
|                                                         |                               |              | <b>RR 0.24</b> (0.11 to 0.53)       |                                                        |
| All-cause mortality*<br>(non-RCTs, patients without HF) | ⊕⊕○○<br>LOW                   | 90 per 1000  | <b>34 per 1000</b><br>(19 to 64)    | 2340<br>(5 observational studies) <sup>N,O,Q,U,V</sup> |
|                                                         |                               |              | <b>RR 0.38</b> (0.21 to 0.72)       |                                                        |
| Hospitalizations (non-RCTs)                             | ⊕○○○<br>VERY LOW <sup>1</sup> | 245 per 1000 | <b>235 per 1000</b><br>(194 to 285) | 17048<br>(2 observational studies) <sup>R,Y</sup>      |
|                                                         |                               |              | <b>RR 0.96</b> (0.79 to 1.16)       |                                                        |

\*Critical Outcomes

<sup>1</sup>Quality of evidence was downgraded due to imprecision (i.e., 95% CI of mean difference crosses clinical decision threshold and/or small sample size)

## APAP-initiated PAP vs. in-lab-initiated PAP for the treatment of obstructive sleep apnea in adults

Figure S58. APAP-initiated PAP vs. In-lab-initiated PAP (AHI, events/hr)

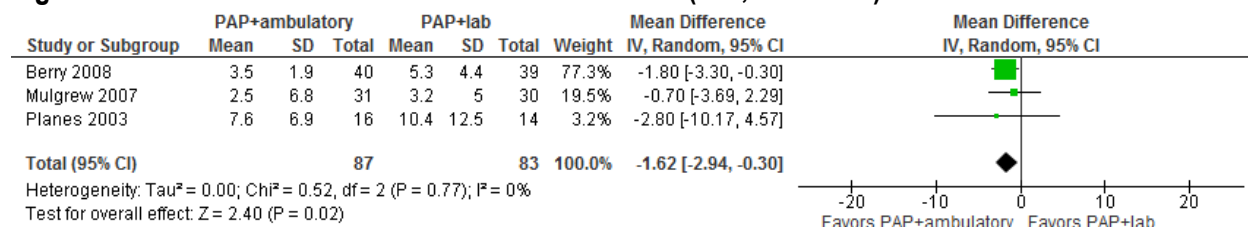

Figure S59. APAP-initiated PAP vs. In-lab-initiated PAP (Adherence, hrs/night)

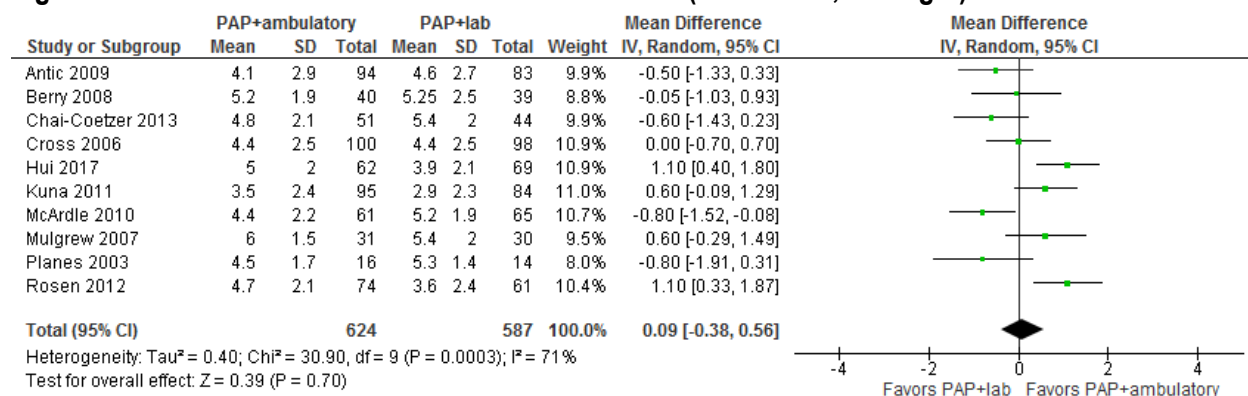

**Figure S60. APAP-initiated PAP vs. In-lab-initiated PAP (ESS)**

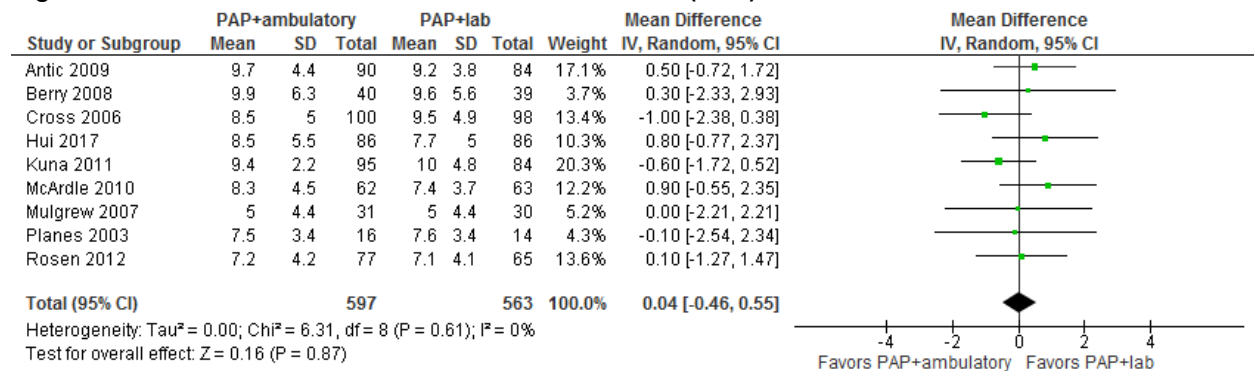

**Figure S61. APAP-initiated PAP vs. In-lab-initiated PAP (FOSQ & SAQLI)**

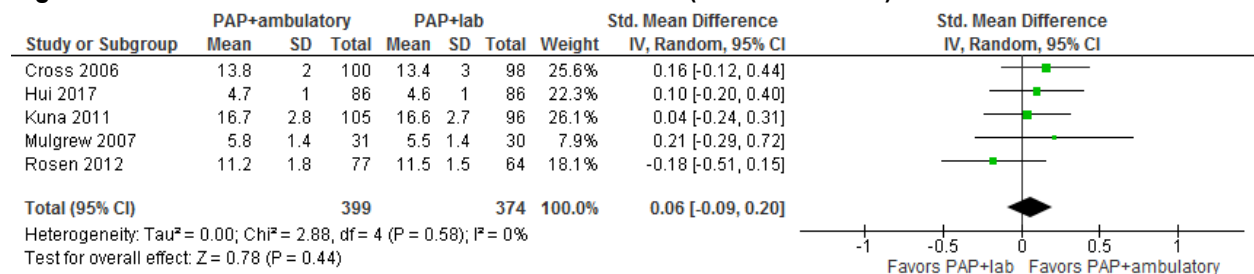

**Table S4. Summary of Findings Table for APAP-initiated PAP vs. In-lab-initiated PAP for the treatment of obstructive sleep apnea in adults**

References: Antic 2009 (A); Berry 2008 (B); Cross 2006 (C); Kuna 2011 (D); McArdle 2010 (E); Mulgrew 2007 (F); Planes 2003 (G); Rosen 2012 (H); Chai-Coetzer 2013 (I); Hui 2017 (J)

| Outcomes                         | Quality of the evidence (GRADE) | Anticipated absolute effects (95% CI)<br>MD between APAP initiated PAP and in-lab initiated PAP                                                                                                         | № of participants (studies)          |
|----------------------------------|---------------------------------|---------------------------------------------------------------------------------------------------------------------------------------------------------------------------------------------------------|--------------------------------------|
| AHI                              | ⊕⊕⊕⊕<br>HIGH                    | the mean AHI in the ambulatory PAP group was 3.3 (3.0). The mean AHI in the in-lab PAP group was 5.0 (4.8). The mean AHI in the APAP initiated group was 1.62 events/hr lower (2.94 lower to 0.3 lower) | 170<br>(3 RCTs) <sup>B,F,G</sup>     |
| Adherence (hrs/night)*           | ⊕⊕⊕⊕<br>HIGH                    | The mean adherence in the APAP initiated group was 0.09 hrs/night less (0.38 more to 0.56 less)                                                                                                         | 1211<br>(10 RCTs) <sup>A-J</sup>     |
| Self-reported Sleepiness (ESS)*  | ⊕⊕⊕⊕<br>HIGH                    | The mean ESS score in the APAP initiated group was 0.04 points higher (0.46 lower to 0.55 higher)                                                                                                       | 1160<br>(9 RCTs) <sup>A,H,J</sup>    |
| Sleep-related QOL* (FOSQ, SAQLI) | ⊕⊕⊕○<br>MODERATE <sup>1</sup>   | The mean FOSQ/SAQLI score in the APAP initiated group was 0.06 standard deviations higher (0.09 lower to 0.20 higher)                                                                                   | 773<br>(5 RCTs) <sup>C,D,F,H,J</sup> |
| QOL* (SF-36 PCS)                 | ⊕⊕○○<br>LOW <sup>1</sup>        | The mean (SF-36 PCS in the APAP initiated group was 2.50 higher (1.65 lower to 6.65 higher)                                                                                                             | 198<br>(1 RCT) <sup>C</sup>          |
| QOL* (SF-36 MCS)                 | ⊕⊕○○<br>LOW <sup>1</sup>        | The mean SF-36 MCS in the APAP initiated group was 1.00 higher (2.19 lower to 4.19 higher)                                                                                                              | 198<br>(1 RCT) <sup>C</sup>          |
| QOL* (SF-36 VS)                  | ⊕⊕⊕⊕<br>HIGH                    | The mean SF-36 Vitality score in the APAP initiated group was 1.2 higher (4.44 higher to 2.04 lower)                                                                                                    | 296<br>(1 RCT) <sup>H</sup>          |

\*Critical Outcomes  
 195% CI of absolute effect crosses clinical significance threshold and/or small sample size

## APAP vs. CPAP for the treatment of obstructive sleep apnea in adults

Figure S62. APAP vs. CPAP (AHI, events/hr)

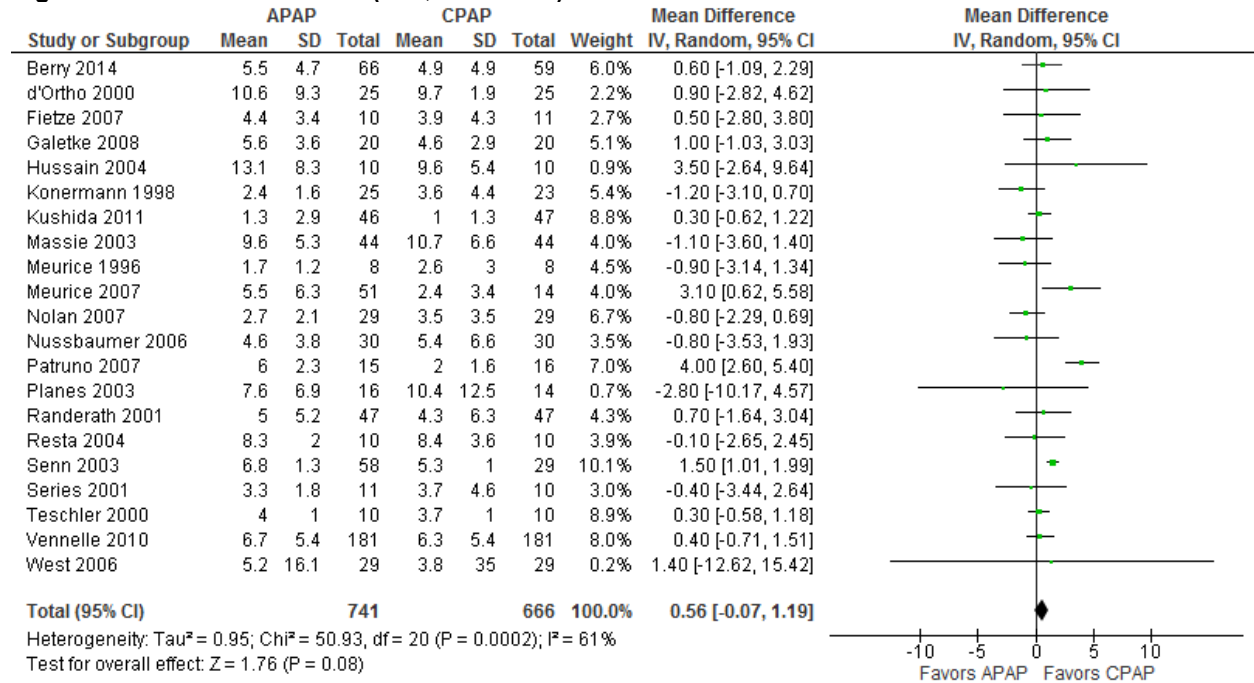

Figure S63. APAP vs. CPAP (Adherence; hrs/night)

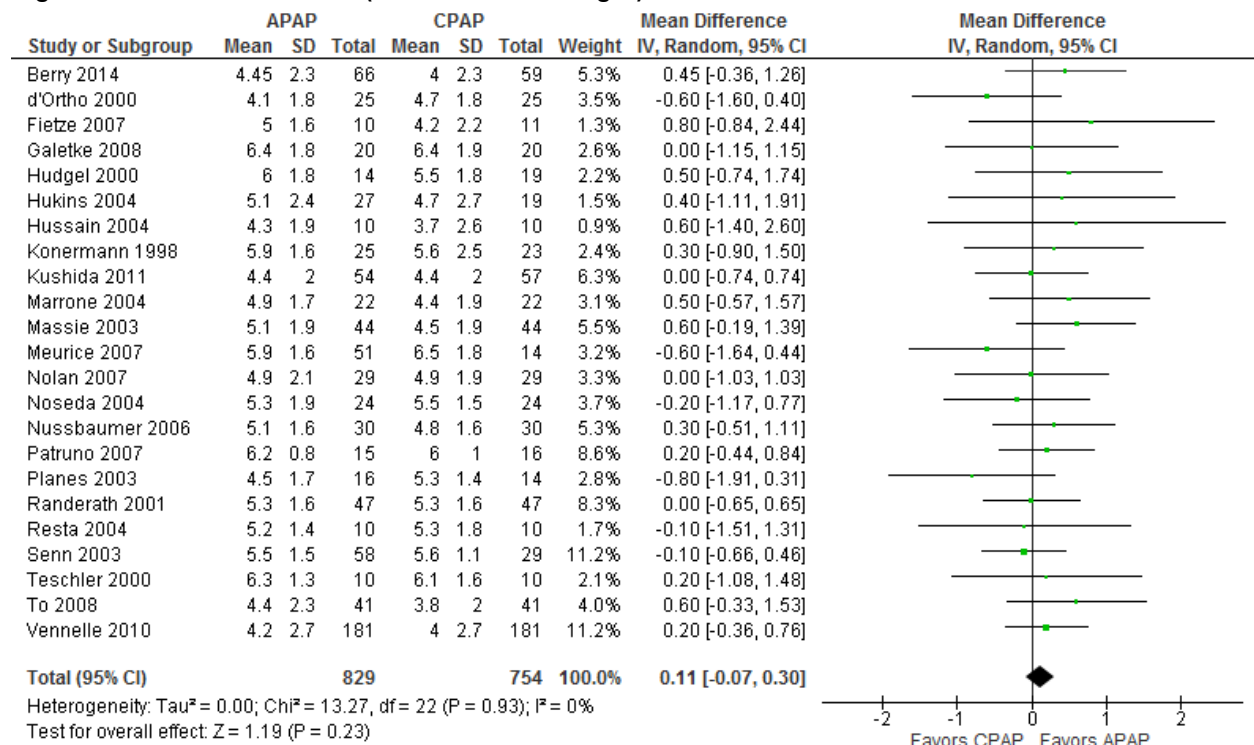

Figure S64. APAP vs. CPAP (Adherence; % nights used)

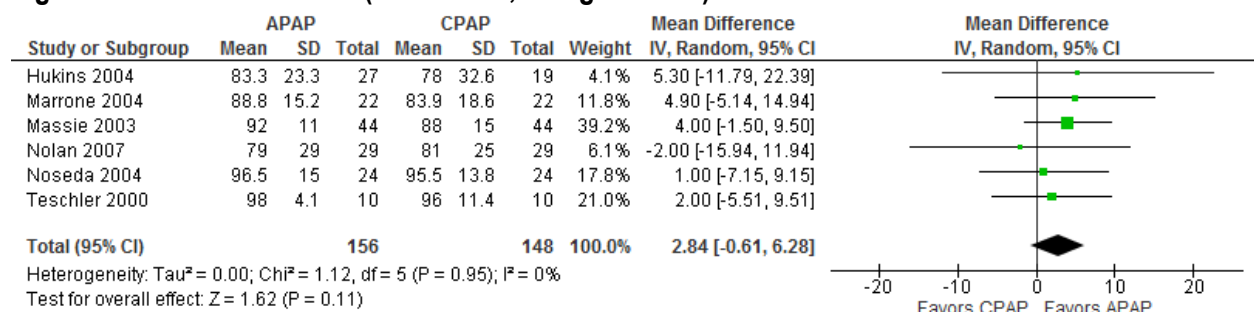

Figure S65. APAP vs. CPAP (Adherence; % nights >4 hrs)

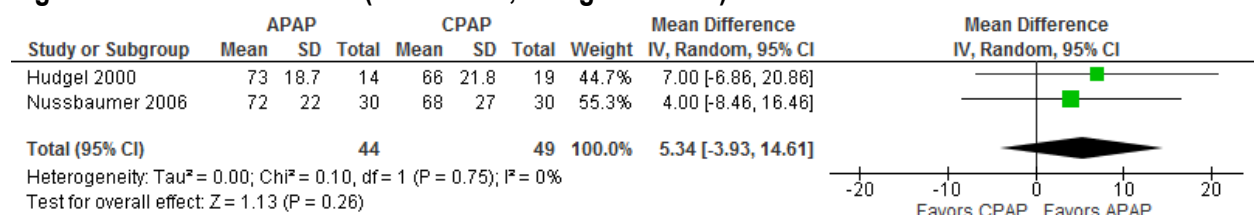



**Figure S66. APAP vs. CPAP (ESS)**

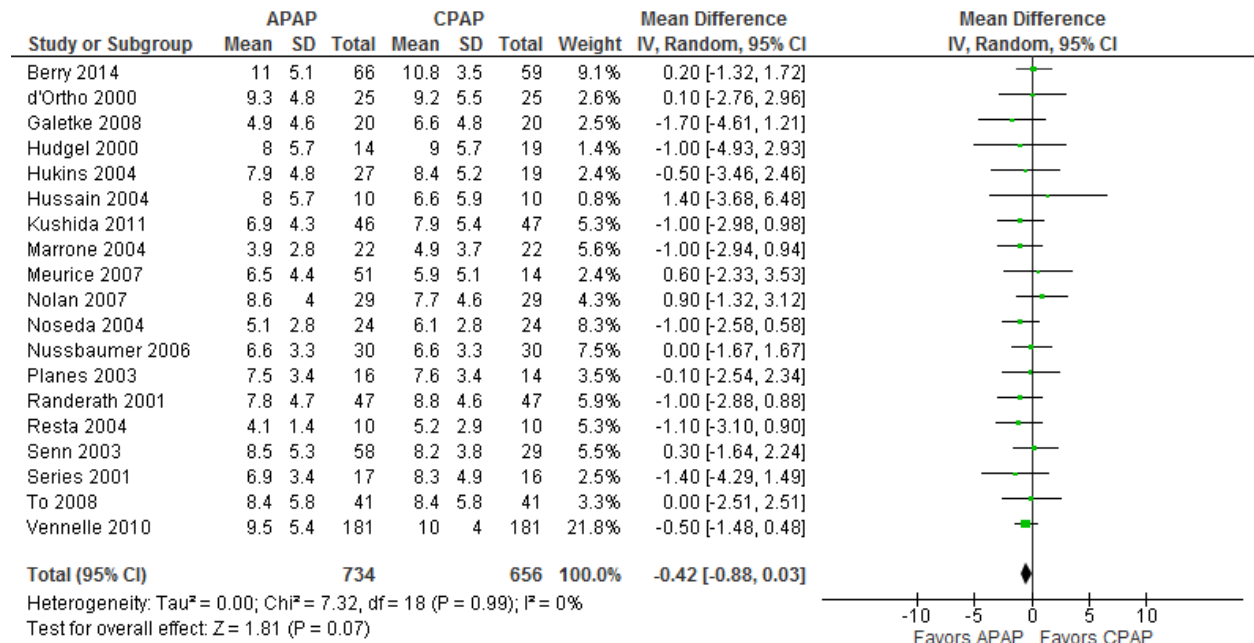

**Figure S67. APAP vs. CPAP (Osler & MWT)**

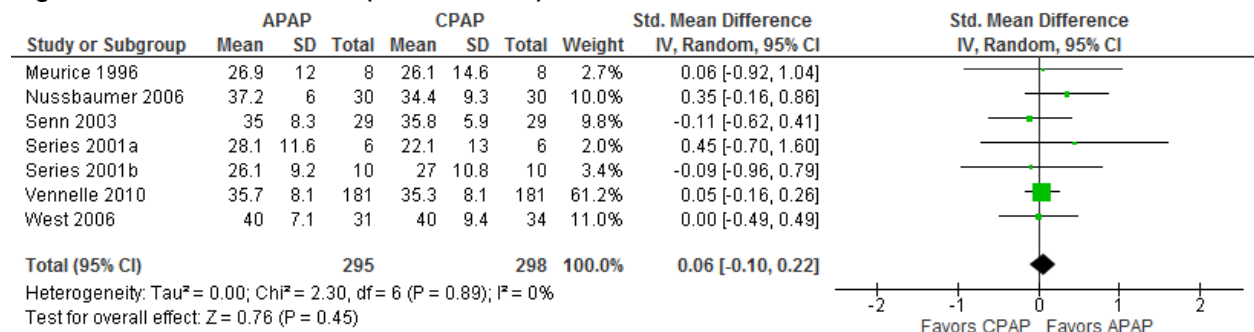

**Figure S68. APAP vs. CPAP (FOSQ & SAQLI)**

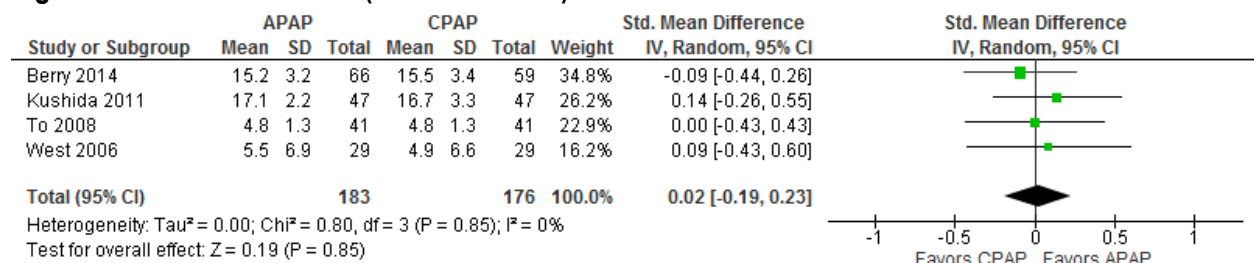

**Figure S69. APAP vs. CPAP (SF-36 PCS)**

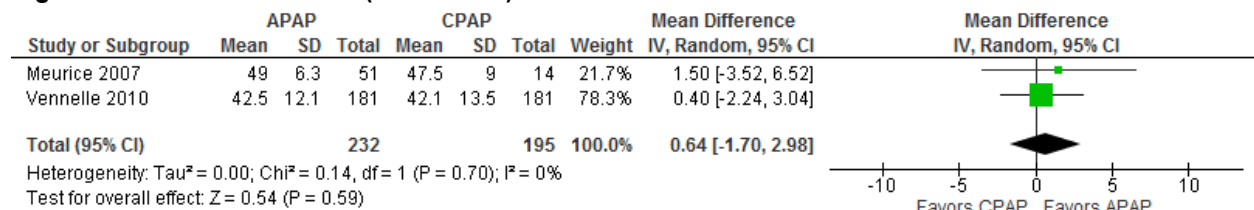

**Figure S70. APAP vs. CPAP (SF-36 MCS)**

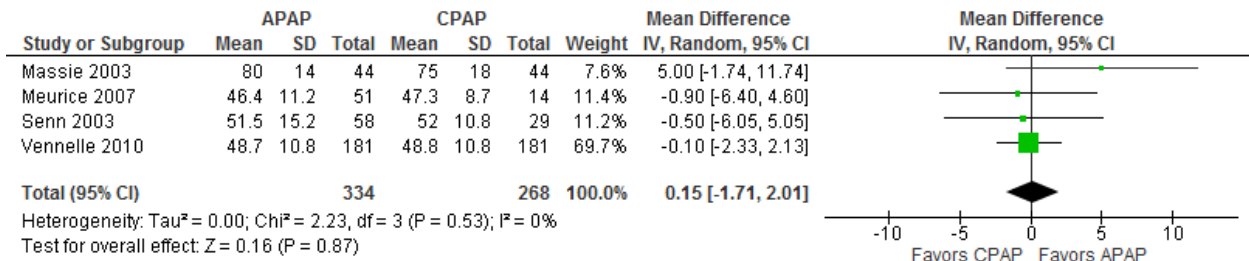

**Figure S71. APAP vs. CPAP (SF-36 VS)**

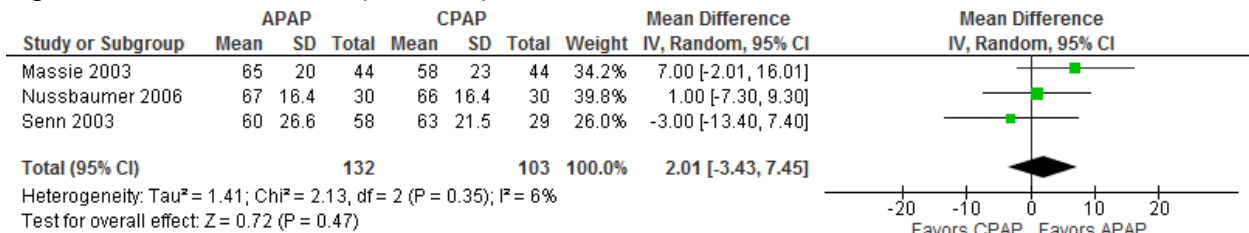

**Figure S72. APAP vs. CPAP (PVT reaction time, msec)**

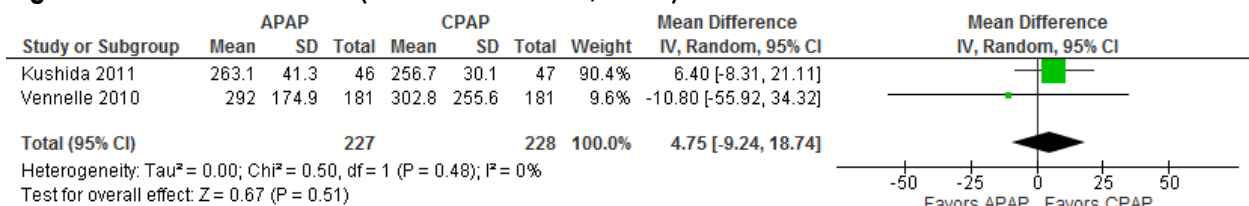

**Figure S73. APAP vs. CPAP (PVT lapses)**

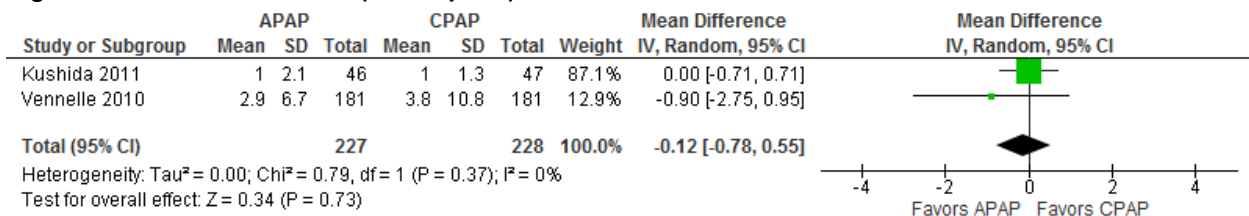

**Figure S74. APAP vs. CPAP (Patient Preference)**

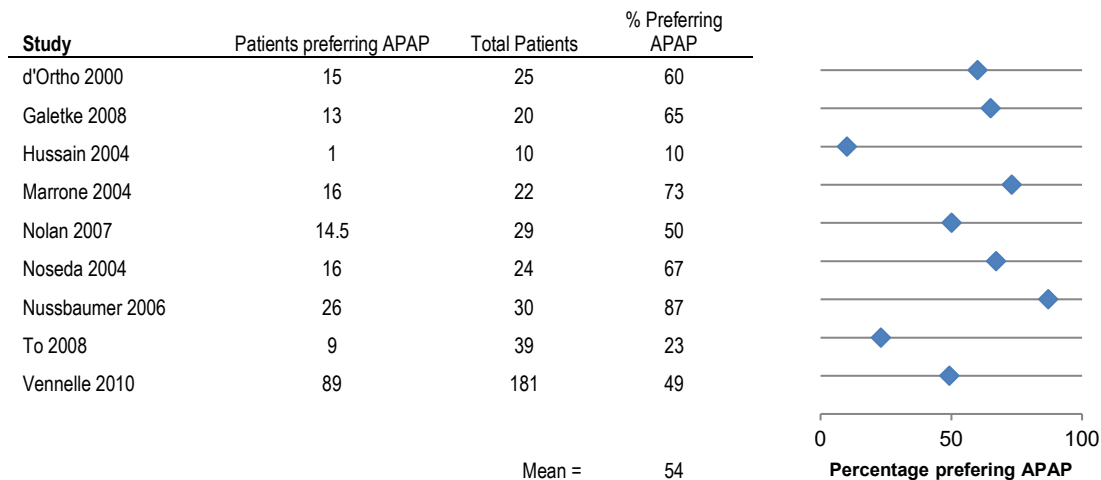

**Table S5. Summary of Findings Table for APAP vs. CPAP for the treatment of obstructive sleep apnea in adults**

**References:** Berry 2014 (A); d'Ortho 2000 (B); Fietze 2007 (C); Galetke 2008 (D); Hudgel 2000 (E); Hukins 2004 (F); Hussain 2004 (G); Konermann 1998 (H); Kushida 2011 (I); Marrone 2004 (J); Massie 2003 (K); Meurice 2007 (L); Nolan 2007 (M); Noseda 2004 (N); Nussbaumer 2006 (O); Patruno 2007 (P); Planes 2003 (Q); Randerath 2001 (R); Resta 2004 (S); Senn 2003 (T); Teschler 2000 (U); To 2008 (V); Vennelle 2010 (W); Series 2001 (X); West 2006 (Y); Meurice 1996 (Z)

| Outcomes                                | Quality of the evidence (GRADE) | Anticipated absolute effects (95% CI)<br>MD between APAP and CPAP                                                                                                                | № of participants (studies)                         |
|-----------------------------------------|---------------------------------|----------------------------------------------------------------------------------------------------------------------------------------------------------------------------------|-----------------------------------------------------|
| AHI                                     | ⊕⊕⊕⊕<br>HIGH                    | The mean AHI in the APAP group was 4.9 (3.1). The mean AHI in the CPAP group was 4.5 (3.4). The mean AHI in the APAP group was 0.56 events/hr higher (0.07 lower to 1.19 higher) | 1407 (21 RCTs) <sup>A-D,G-I,K-M,O-U,W-Z</sup>       |
| Adherence (hrs/night)*                  | ⊕⊕⊕⊕<br>HIGH                    | The mean adherence in the APAP group was 0.11 hrs/night more (0.07 less to 0.30 more)                                                                                            | 1583 (23 RCTs) <sup>A-W</sup>                       |
| Adherence (% nights used)*              | ⊕⊕⊕○<br>MODERATE <sup>1</sup>   | The mean nights PAP used in the APAP group was 2.84% more (6.37 more to 0.09 less)                                                                                               | 304 (6 RCTs) <sup>F,J,K,M,N,T</sup>                 |
| Adherence (% nights >4hrs)*             | ⊕⊕⊕○<br>MODERATE <sup>1</sup>   | The mean nights used >4hrs in the APAP group was 5.34% more (3.93 less to 14.61 more)                                                                                            | 93 (2 RCTs) <sup>E,O</sup>                          |
| Self-reported sleepiness* (ESS)         | ⊕⊕⊕⊕<br>HIGH                    | The mean ESS score in the APAP group was 0.42 lower (0.88 lower to 0.03 lower)                                                                                                   | 1390 (19 RCTs) <sup>A,B,D-G,I,J,L-O,Q-T,X,V,W</sup> |
| Objective sleepiness* (Osler & MWT)     | ⊕⊕⊕○<br>MODERATE <sup>1</sup>   | The mean Osler/MWT sleep latency in the APAP group was 0.06 standard deviations lower (0.22 lower to 0.01 higher)                                                                | 593 (6 RCTs) <sup>O,T,W,Z</sup>                     |
| PVT reaction time                       | ⊕⊕⊕○<br>MODERATE <sup>1</sup>   | The mean PVT reaction time in the APAP group was 4.75 msec slower (9.24 faster to 18.74 slower)                                                                                  | 455 (2 RCTs) <sup>L,W</sup>                         |
| PVT lapses                              | ⊕⊕⊕○<br>MODERATE <sup>1</sup>   | The mean PVT lapses in the APAP group was 0.12 lower (0.78 lower to 0.55 higher)                                                                                                 | 455 (2 RCTs) <sup>L,W</sup>                         |
| Sleep-related QOL* (FOSQ & SAQLI)       | ⊕⊕⊕○<br>MODERATE <sup>1</sup>   | The mean SAQLI/FOSQ in the APAP group was 0.02 standard deviations higher (0.19 lower to 0.23 higher)                                                                            | 359 (4 RCT) <sup>A,I,V,Y</sup>                      |
| QOL* (SF-36 Physical Component Summary) | ⊕⊕⊕⊕<br>HIGH                    | The mean SF-36 Physical Component Score in the APAP group was 0.64 higher (1.70 lower to 2.98 higher)                                                                            | 427 (2 RCTs) <sup>L,W</sup>                         |
| QOL* (SF-36 Mental Component Summary)   | ⊕⊕⊕⊕<br>HIGH                    | The mean SF-36 Mental Component Score in the APAP group was 0.15 higher (1.71 lower to 2.01 higher)                                                                              | 602 (4 RCTs) <sup>K,L,T,W</sup>                     |
| QOL* (SF-36 Vitality Score)             | ⊕⊕⊕⊕<br>HIGH                    | The mean SF-36 Vitality Score in the APAP group was 2.01 higher (3.43 lower to 7.45 higher)                                                                                      | 235 (3 RCTs) <sup>K,O,T</sup>                       |
| Side Effects                            | ⊕⊕○○<br>LOW <sup>1,2</sup>      | Meta-analysis not performed due to inconsistent methods of measuring and reporting of side effects across studies                                                                | 494 (11 RCTs) <sup>B,F,I,K,M,O,Q-T,V</sup>          |

\*Critical Outcomes

<sup>1</sup>Quality of evidence was downgraded due to imprecision (i.e., 95% CI of mean difference crosses clinical decision threshold and/or small sample size)

<sup>2</sup>Quality of evidence due to heterogeneity

## BPAP vs. CPAP for the treatment of obstructive sleep apnea in adults

Figure S75. BPAP vs. CPAP (AHI, events/hr)

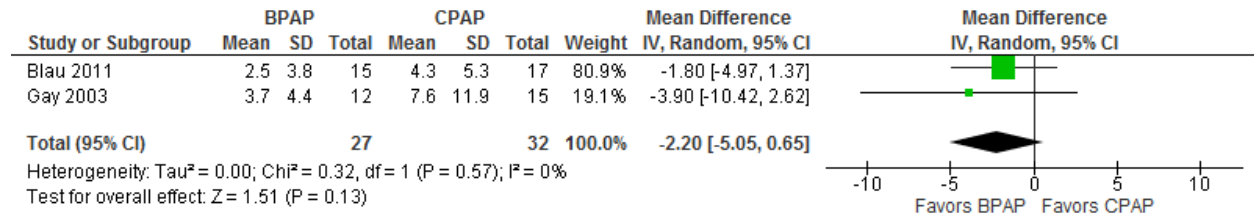

Figure S76. BPAP vs. CPAP (Adherence, hrs/night)\*

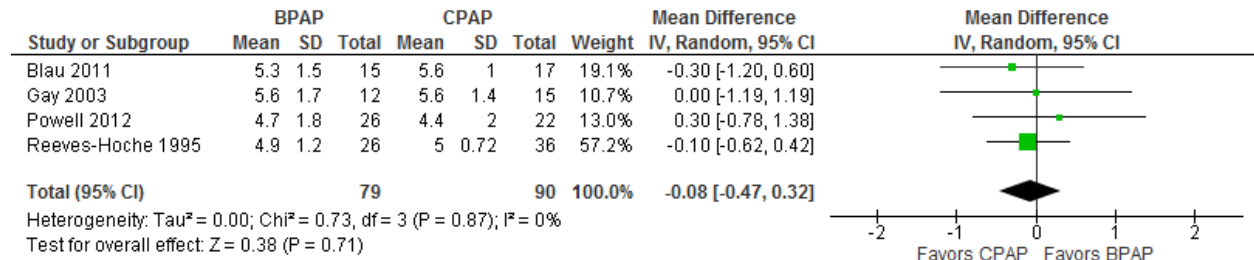

\*Studies included patients who were previously untreated with PAP

Figure S77. BPAP vs. CPAP (ESS)\*

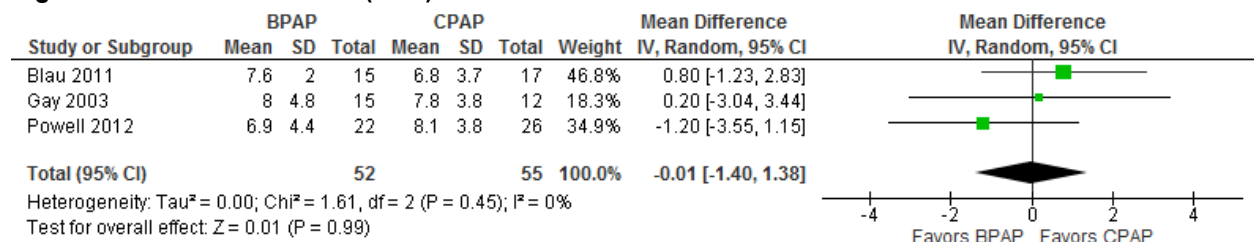

\*Studies included patients who were previously untreated with PAP

Table S6. Summary of Findings Table for BPAP vs. CPAP for the treatment of obstructive sleep apnea in adults

| Outcomes                                                                                                 | Quality of the evidence (GRADE) | Anticipated absolute effects (95% CI)<br>MD between BPAP and CPAP                                                                                                                | № of participants (studies)    |
|----------------------------------------------------------------------------------------------------------|---------------------------------|----------------------------------------------------------------------------------------------------------------------------------------------------------------------------------|--------------------------------|
| <b>References:</b> Ballard 2007 (A), Gay 2003 (B); Powell 2012 (C); Reeves-Hoche 1995 (D); Blau 2011 (E) |                                 |                                                                                                                                                                                  |                                |
| <b>PAP naïve</b>                                                                                         |                                 |                                                                                                                                                                                  |                                |
| AHI                                                                                                      | ⊕⊕○○<br>LOW <sup>12</sup>       | The mean AHI in the APAP group was 2.7 (3.9). The mean AHI in the CPAP group was 4.9 (6.6). The mean AHI in the BPAP group was 2.20 events/hr lower (5.05 lower to 0.65 greater) | 59<br>(2 RCTs) <sup>B,E</sup>  |
| Adherence (hrs/night)*<br>PAP naïve                                                                      | ⊕⊕○○<br>LOW <sup>12</sup>       | The mean adherence in the BPAP group was 0.08 hrs/night lower (0.47 lower to 0.32 higher)                                                                                        | 169<br>(4 RCTs) <sup>B,E</sup> |

|                                        |                                 |                                                                                                                   |                                  |
|----------------------------------------|---------------------------------|-------------------------------------------------------------------------------------------------------------------|----------------------------------|
| Sleepiness (ESS)*                      | ⊕⊕○○<br>LOW <sup>1,2</sup>      | The mean ESS in the BPAP group was 0.01 less (1.40 less to 1.38 more)                                             | 107<br>(3 RCTs) <sup>B,C,E</sup> |
| Sleep-related QOL* (FOSQ)<br>PAP naïve | ⊕○○○<br>VERY LOW <sup>1,2</sup> | The mean QOL (FOSQ) in the BPAP group was 0.02 standard deviations lower (0.44 lower to 0.39 higher)              | 89<br>(1 RCT) <sup>B</sup>       |
| Sleep Quality (PSQI)                   | ⊕○○○<br>VERY LOW <sup>1,2</sup> | The mean PSQI in the BPAP group was 0.07 standard deviations higher (0.62 lower to 0.77 higher)                   | 32<br>(1 RCT) <sup>E</sup>       |
| Side Effects                           | ⊕⊕○○<br>LOW <sup>1,2</sup>      | Meta-analysis not performed due to inconsistent methods of measuring and reporting of side effects across studies | 97 (2 RCTs) <sup>D,E</sup>       |
| <b>Rescue Therapy</b>                  |                                 |                                                                                                                   |                                  |
| Adherence (hrs/night)*                 | ⊕⊕○○<br>LOW <sup>1,2</sup>      | The mean adherence (hrs/night) in the BPAP group was 0.80 higher (0.03 lower to 1.63 higher)                      | 104<br>(1 RCT) <sup>A</sup>      |
| Sleep-related QOL* (FOSQ)              | ⊕○○○<br>VERY LOW <sup>1,2</sup> | The mean FOSQ in the BPAP group was 0.23 standard deviations higher (0.33 lower to 0.40 higher)                   | 27<br>(1 RCT) <sup>A</sup>       |

\*Critical Outcomes

<sup>1</sup>Industry funded studies

<sup>2</sup>Quality of evidence was downgraded due to imprecision (i.e., 95% CI of mean difference crosses clinical decision threshold and/or small sample size)

<sup>3</sup>Study by Ballard 2007 employed BPAP as a rescue therapy

## Educational and behavioral interventions plus PAP vs. standard care plus PAP for the treatment of obstructive sleep apnea in adults

Figure S78. Education + PAP vs. Usual Care + PAP (Adherence, hrs/night)

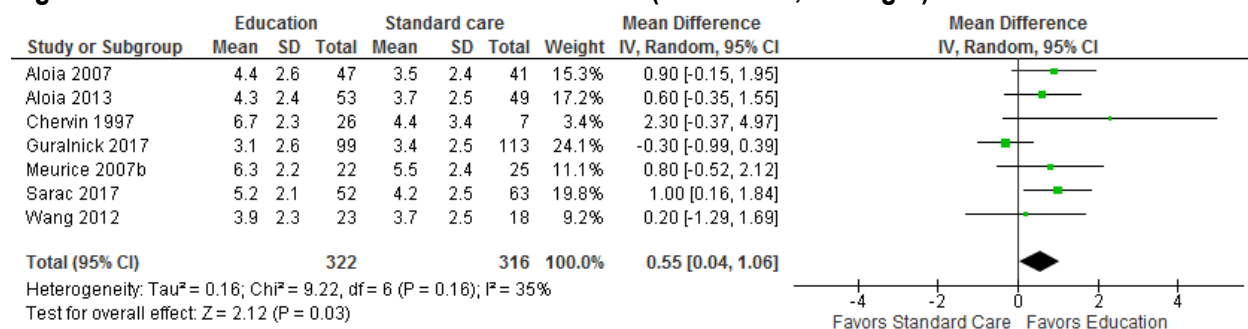

Figure S79. Education + PAP vs. Usual Care + PAP (Adherence, # patients with mean usage > 4hrs/night)

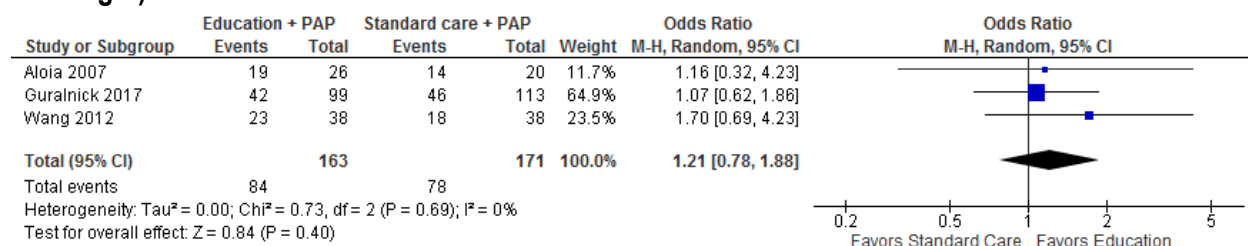

**Table S7. Summary of Findings Table for Educational Interventions + PAP vs. Standard Care + PAP**

References: Aloia 2007 (A); Aloia 2013 (B); Chervin 1997 (C); Meurice 2007 (D); Wang 2012 (E); Guralnick 2017 (F); Sarac 2017 (G)

| Outcomes                                             | Quality of the evidence (GRADE) | Anticipated absolute effects (95% CI)<br>MD between education and standard care                                             | № of participants (studies)                                                  |
|------------------------------------------------------|---------------------------------|-----------------------------------------------------------------------------------------------------------------------------|------------------------------------------------------------------------------|
| Adherence* (hrs/night)                               | ⊕⊕⊕○<br>MODERATE <sup>1</sup>   | The mean adherence (hrs/night) in the educational intervention group was 0.55 hrs/night higher (0.04 higher to 1.06 higher) | 638<br>(7 RCTs) <sup>A-G</sup>                                               |
| <b>Relative Effect</b>                               |                                 |                                                                                                                             |                                                                              |
|                                                      |                                 | Baseline Risk                                                                                                               | Comparative risk                                                             |
| Adherence* (# patients with mean usage >4 hrs/night) | ⊕⊕⊕○<br>MODERATE <sup>2</sup>   | 632 per 1,000                                                                                                               | <b>675 per 1,000</b><br>(572 to 763)<br><br><b>OR 1.21</b><br>(0.78 to 1.88) |
| 334 (3 RCTs) <sup>D-F</sup>                          |                                 |                                                                                                                             |                                                                              |

\*Critical Outcomes  
<sup>1</sup>Quality of evidence was downgraded due to imprecision (i.e., 95% CI of mean difference crosses clinical decision threshold)  
<sup>2</sup>Quality of evidence was downgraded due to imprecision (i.e., 95% CI of odds ratio crosses center line of plot and/or small sample size)

**Figure S80. Behavioral Interventions + PAP vs. Usual Care + PAP (Adherence, hrs/night)**

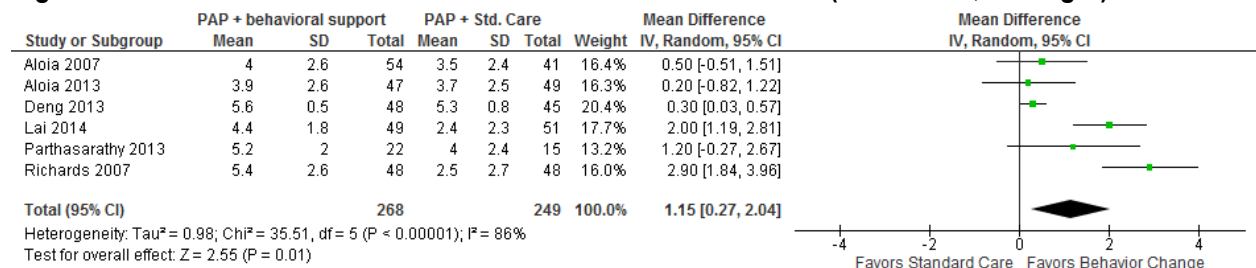

**Figure S81. Behavioral Interventions + PAP vs. Usual Care + PAP (Adherence, # patients with mean usage > 4hrs/night)**

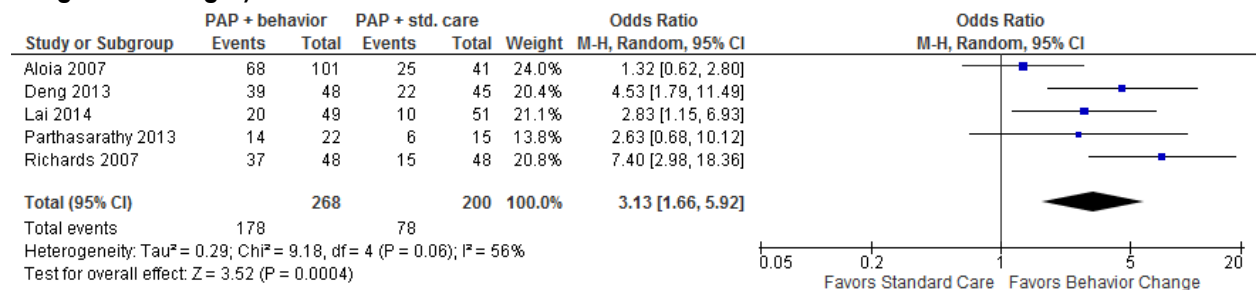

**Table S8. Summary of Findings Table for Behavioral Interventions + PAP vs. Usual Care + PAP in the treatment of obstructive sleep apnea in adults**

References: Aloia 2007 (A); Aloia 2013 (B); Deng 2013 (C); Lai 2014 (D); Parthasarathy 2013 (E); Richards 2007 (F)

| Outcomes               | Quality of the evidence (GRADE) | Anticipated absolute effects (95% CI)<br>MD between behavior modification and standard care         | № of participants (studies)    |
|------------------------|---------------------------------|-----------------------------------------------------------------------------------------------------|--------------------------------|
| Adherence* (hrs/night) | ⊕⊕⊕○<br>MODERATE <sup>1</sup>   | The mean adherence in the intervention group was 1.15 hrs/night higher (0.27 higher to 2.04 higher) | 517<br>(6 RCTs) <sup>A-F</sup> |

|                                                     |              | Relative Effect |                                                                              |                                  |
|-----------------------------------------------------|--------------|-----------------|------------------------------------------------------------------------------|----------------------------------|
|                                                     |              | Baseline Risk   | Comparative risk                                                             |                                  |
| Adherence* (#patients with mean usage >4 hrs/night) | ⊕⊕⊕⊕<br>HIGH | 390 per 1,000   | <b>667 per 1,000</b><br>(515 to 791)<br><br><b>OR 3.13</b><br>(1.66 to 5.92) | 468<br>(5 RCTs) <sup>A,C,F</sup> |

\*Critical Outcomes

<sup>1</sup>Quality of evidence was downgraded due to imprecision (i.e., 95% CI of mean difference crosses clinical decision threshold)

**Figure S82. Education + Troubleshooting + PAP vs. Usual Care + PAP (Adherence, hrs/night)**

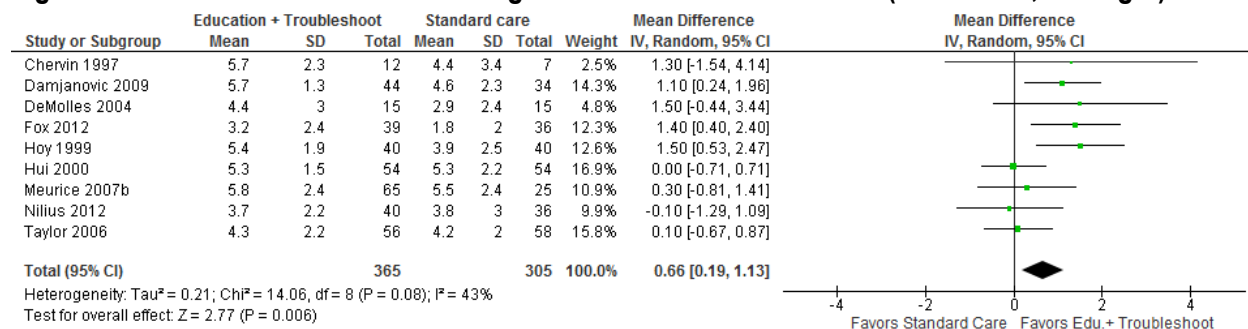

**Table S9. Summary of Findings Table for Education + Troubleshooting + PAP vs. Usual Care + PAP in the treatment of obstructive sleep apnea in adults**

**References:** Chervin 1997 (A); Damjanovic 2009 (B); DeMolles 2004 (C); Fox 2012 (D); Hoy 1999 (E); Hui 2000 (F); Meurice 2007 (G); Nilius 2012 (H); Taylor 2006 (I)

| Outcomes               | Quality of the evidence (GRADE) | Anticipated absolute effects (95% CI)                                                               |  | No of participants (studies)   |
|------------------------|---------------------------------|-----------------------------------------------------------------------------------------------------|--|--------------------------------|
|                        |                                 | MD between education plus troubleshooting and standard care                                         |  |                                |
| Adherence (hrs/night)* | ⊕⊕⊕○<br>MODERATE <sup>1</sup>   | The mean adherence in the intervention group was 0.66 hrs/night higher (0.19 higher to 1.13 higher) |  | 670<br>(9 RCTs) <sup>A-I</sup> |

  

|                                                      |                               | Relative Effect |                                                                              |                             |
|------------------------------------------------------|-------------------------------|-----------------|------------------------------------------------------------------------------|-----------------------------|
|                                                      |                               | Baseline Risk   | Comparative risk                                                             |                             |
| Adherence (# patients with mean usage >4 hrs/night)* | ⊕⊕⊕○<br>MODERATE <sup>1</sup> | 704 per 1,000   | <b>740 per 1,000</b><br>(553 to 869)<br><br><b>OR 1.20</b><br>(0.52 to 2.80) | 108<br>(1 RCT) <sup>F</sup> |

\*Critical Outcomes

<sup>1</sup>Quality of evidence was downgraded due to imprecision (i.e., 95% CI of mean difference crosses clinical decision threshold and/or small sample size)

# Telemonitoring + PAP vs. Usual Care + PAP for the treatment of obstructive sleep apnea in adults

**Figure S83. Telemonitoring + PAP vs. Usual Care + PAP (adherence, hrs/day)**

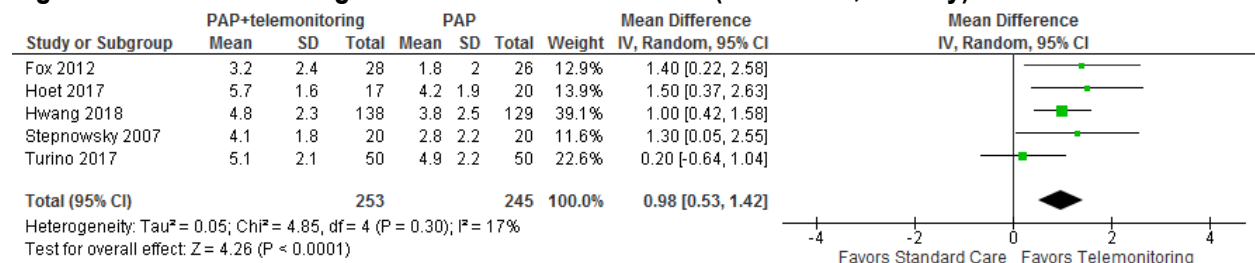

**Figure S84. Telemonitoring + PAP vs. Usual Care + PAP (ESS)**

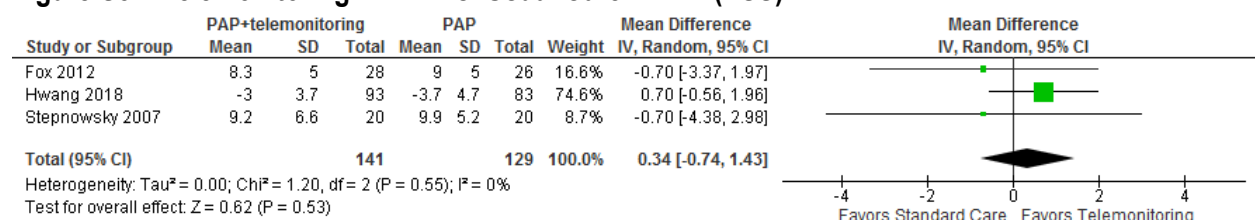

**Table S10. Summary of Findings Table for Telemonitoring + PAP vs. Usual Care + PAP in the treatment of obstructive sleep apnea in adults**

References: Fox 2012 (A); Stepnowsky 2007 (B); Hoet 2017 (C); Hwang 2018 (D); Turino 2017 (E)

| Outcomes                          | Quality of the evidence (GRADE) | Anticipated absolute effects (95% CI)<br>MD between monitoring and standard care                                  | № of participants (studies)      |
|-----------------------------------|---------------------------------|-------------------------------------------------------------------------------------------------------------------|----------------------------------|
| Adherence (hrs/night)*            | ⊕⊕⊕⊕<br>HIGH                    | The mean adherence in the intervention group was 0.98 hrs/night higher (0.53 higher to 1.42 higher)               | 498<br>(5 RCTs) <sup>A,E</sup>   |
| Self-reported Sleepiness (ESS)*   | ⊕⊕⊕○<br>MODERATE <sup>1</sup>   | The mean ESS score in the intervention group was 0.34 lower (0.74 higher to 1.43 lower)                           | 270<br>(3 RCTs) <sup>A,B,D</sup> |
| CPAP discomfort (0-10 scale)*     | ⊕⊕○○<br>LOW <sup>1</sup>        | The mean CPAP discomfort score (0-10 scale) in the intervention group was 0.8 lower (2.41 lower to 0.81 higher)   | 54<br>(1 RCT) <sup>A</sup>       |
| Difficulty exhaling (0-10 scale)* | ⊕⊕○○<br>LOW <sup>1</sup>        | The mean difficulty exhaling score (0-10 scale) in the intervention group was 1 lower (2.74 lower to 0.74 higher) | 54<br>(1 RCT) <sup>A</sup>       |
| Mask leaks (0-10 scale)*          | ⊕⊕○○<br>LOW <sup>1</sup>        | The mean mask leaks score (0-10 scale) in the intervention group was 0.9 lower (2.45 lower to 0.65 higher)        | 54<br>(1 RCT) <sup>A</sup>       |
| Dry mouth (0-10 scale)*           | ⊕⊕○○<br>LOW <sup>1</sup>        | The mean dry mouth score (0-10 scale) in the intervention group was 1.6 lower (2.91 lower to 0.29 lower)          | 54<br>(1 RCT) <sup>A</sup>       |
| Nasal congestion (0-10 scale)*    | ⊕⊕○○<br>LOW <sup>1</sup>        | The mean nasal congestion score (0-10 scale) in the intervention group was 0.9 lower (2.27 lower to 0.47 higher)  | 54<br>(1 RCT) <sup>A</sup>       |



|                           |               |                                                                                            |                             |
|---------------------------|---------------|--------------------------------------------------------------------------------------------|-----------------------------|
| Sleep-related QOL (FOSQ)* | ⊕⊕○○<br>LOW 1 | The mean FOSQ score in the intervention group was 0.80 lower (3.66 lower to 2.06 higher)   | 40<br>(1 RCT) <sup>B</sup>  |
| QOL (EuroQOL)*            | ⊕⊕○○<br>LOW 1 | The mean EuroQOL score in the intervention group was 0.00 lower (0.07 lower to 0.07 lower) | 100<br>(1 RCT) <sup>E</sup> |

\*Critical Outcomes

<sup>1</sup>Quality of evidence was downgraded due to imprecision (i.e., 95% CI of mean difference crosses clinical decision threshold and/or small sample size)

## Modified pressure profile PAP vs. standard PAP for the treatment of obstructive sleep apnea in adults

Figure S85. Modified pressure profile PAP vs. Standard PAP (Adherence, hrs/night)

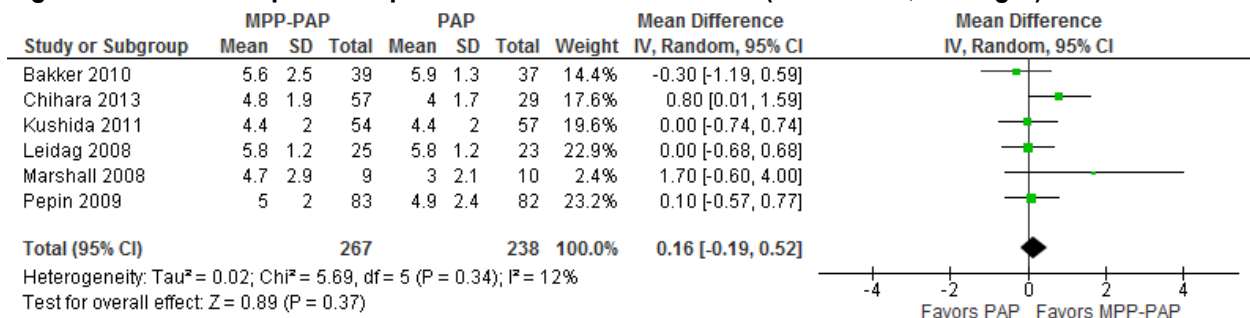

Figure S86. Modified pressure profile PAP vs. Standard PAP (ESS)

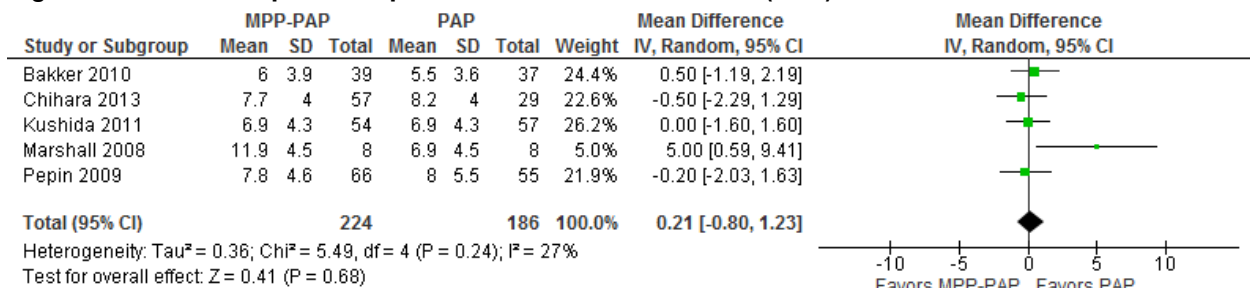

Figure S87. Modified pressure profile PAP vs. Standard PAP (FOSQ & SAQLI)

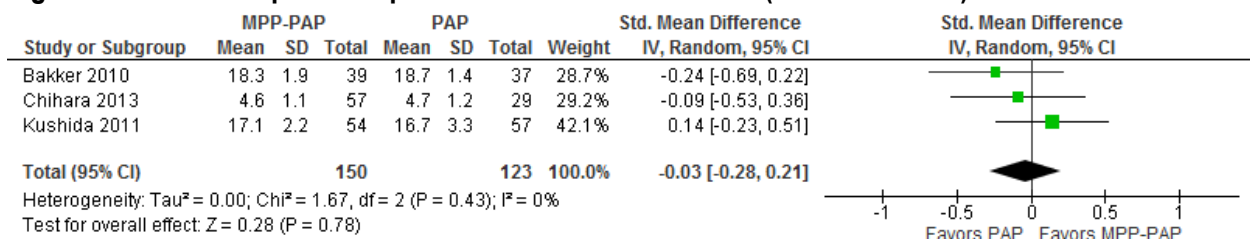

**Figure S88. Modified pressure profile PAP vs. Standard PAP (PSQI)**

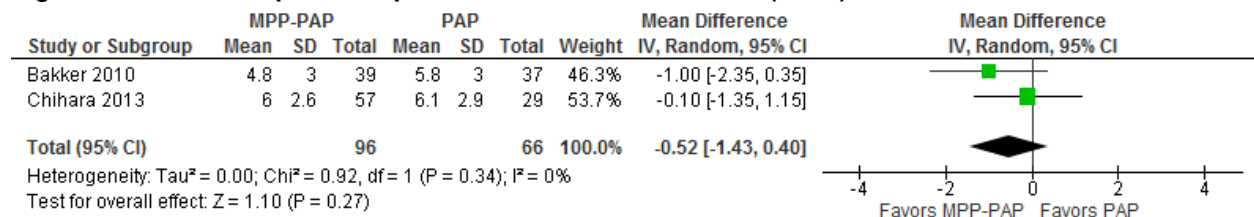

**Figure S89. Modified pressure profile PAP vs. Standard PAP (change in PVT Reaction Time)**

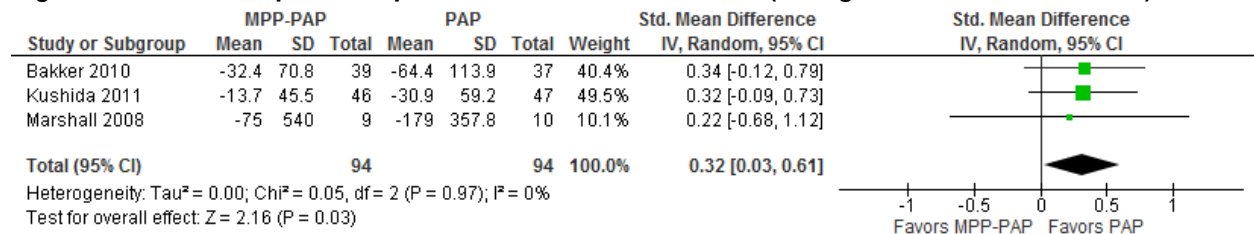

**Figure S90. Modified pressure profile PAP vs. Standard PAP (change in PVT Lapses)**

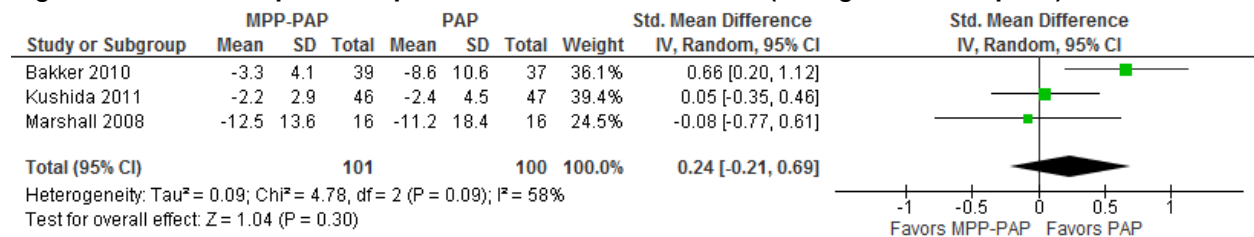

**Table S11. Summary of Findings Table for modified pressure profile PAP vs. standard PAP in the treatment of obstructive sleep apnea in adults**

**References:** Bakker 2010 (A); Chihara 2013 (B); Kushida 2011 (C); Marshall 2008 (D); Pepin 2009 (E); Leidag 2008 (F); Nilius 2006 (G)

| Outcomes                                | Quality of the evidence (GRADE) | Anticipated absolute effects (95% CI)<br>MD between modified pressure profile PAP and standard PAP                                                       | No of participants (studies)     |
|-----------------------------------------|---------------------------------|----------------------------------------------------------------------------------------------------------------------------------------------------------|----------------------------------|
| Adherence (hrs/night)*                  | ⊕⊕○○<br>LOW <sup>1,2</sup>      | The mean adherence in the modified pressure profile group was 0.16 hrs/night greater (0.52 greater to 0.19 fewer)                                        | 505<br>(6 RCTs) <sup>A,F</sup>   |
| Self-reported Sleepiness (ESS)*         | ⊕⊕○○<br>LOW <sup>1,2</sup>      | The mean ESS score in the modified pressure profile group was 0.21 higher (1.23 higher to 0.80 lower)                                                    | 413<br>(5 RCTs) <sup>A,E</sup>   |
| Attention/Vigilance (PVT Reaction Time) | ⊕⊕○○<br>LOW <sup>1,2</sup>      | The mean PVT Reaction Time in the modified pressure profile group was 0.32 standard deviations lower (0.03 lower to 0.61 lower)                          | 188<br>(3 RCTs) <sup>A,C,D</sup> |
| Attention/Vigilance (PVT Lapses)        | ⊕⊕○○<br>LOW <sup>1,2</sup>      | The mean PVT Lapses in the modified pressure profile group based on PVT <sub>Lapses</sub> was 0.24 standard deviations lower (0.53 lower to 0.04 higher) | 188<br>(3 RCTs) <sup>A,C,D</sup> |
| Sleep-related QOL* (FOSQ & SAQLI)       | ⊕⊕○○<br>LOW <sup>1,2</sup>      | The mean FOSQ/SAQLI in the modified pressure profile group was 0.03 standard deviations less (0.28 less to 0.21 greater)                                 | 273 (3 RCTs) <sup>A,C</sup>      |

|                      |                                 |                                                                                                                        |                               |
|----------------------|---------------------------------|------------------------------------------------------------------------------------------------------------------------|-------------------------------|
| QOL* (SF-36 PCS)     | ⊕○○○<br>VERY LOW <sup>1,2</sup> | The mean SF-36 Physical Component Score in the modified pressure profile group was 1.3 more (9.93 fewer to 12.53 more) | 76<br>(1 RCT) <sup>A</sup>    |
| QOL* (SF-36 MCS)     | ⊕○○○<br>VERY LOW <sup>1,2</sup> | The mean SF-36 Mental Component Score in the modified pressure profile group was 0.4 less (9.53 greater to 10.33 less) | 76<br>(1 RCT) <sup>A</sup>    |
| QOL* (SF-36 VS)      | ⊕⊕○○<br>LOW <sup>1,2</sup>      | The mean SF-36 Vitality Score in the modified pressure profile group was 2.5 less (6.44 greater to 11.44 less)         | 76<br>(1 RCT) <sup>A</sup>    |
| Sleep Quality (PSQI) | ⊕⊕○○<br>LOW <sup>1,2</sup>      | The mean PSQI score in the modified pressure profile group was 0.52 less (0.40 greater to 1.43 less)                   | 162<br>(2 RCT) <sup>A,B</sup> |
| Side Effects*        | ⊕⊕○○<br>LOW <sup>1,2</sup>      | Meta-analysis not performed due to inconsistent methods of measuring and reporting of side effects across studies      | 313 (3 RCT) <sup>C,E,G</sup>  |

\*Critical Outcomes

<sup>1</sup>Quality of evidence was downgraded due to imprecision (i.e., 95% CI of mean difference crosses clinical decision threshold and/or small sample size)

<sup>2</sup>Quality of evidence was downgraded due to potential risk of bias from industry funding.

## Oral vs. oronasal vs. nasal (nasal mask vs. intranasal mask) CPAP for the treatment of obstructive sleep apnea in adults

Figure S91. Nasal pillows vs. Nasal mask (AHI, events/hr)

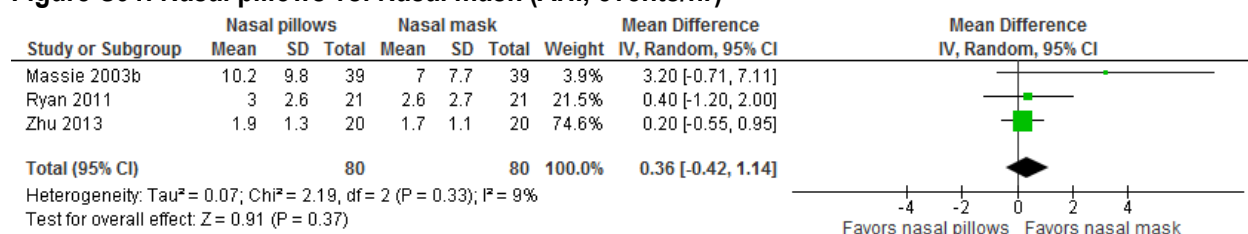

Figure S92. Nasal pillows vs. Nasal mask (Adherence, hrs/night)

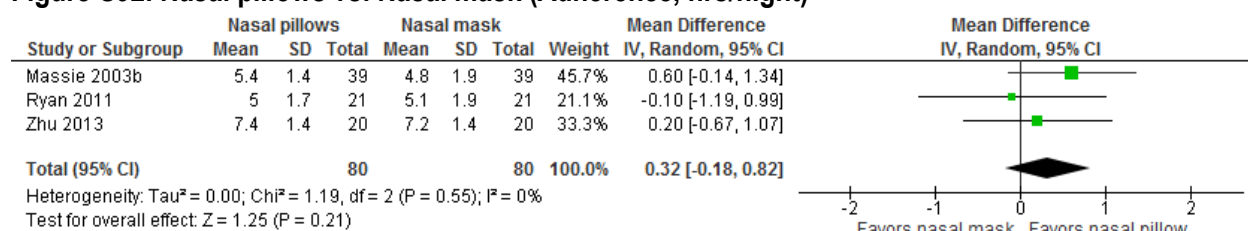

Figure S93. Nasal pillows vs. Nasal mask (Adherence, % nights used)

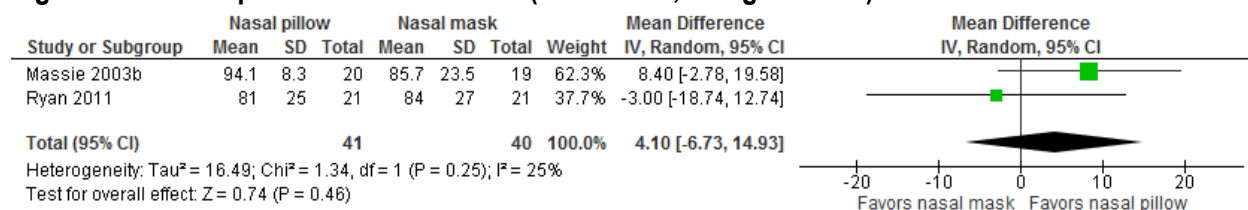

**Figure S94. Nasal pillows vs. Nasal mask (ESS)**

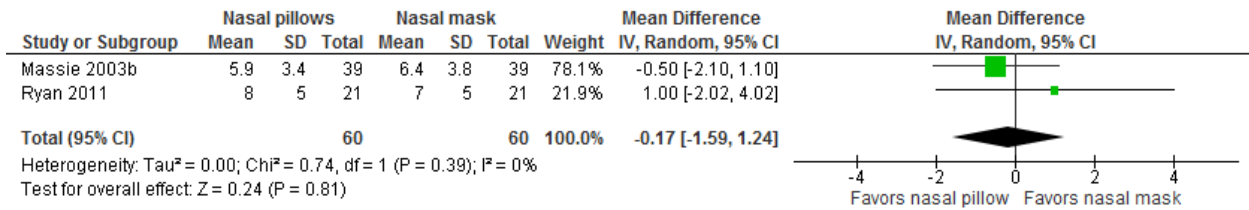

**Table S12. Summary of Findings Table for Nasal pillows vs. Nasal mask**

References: Massie 2003 (A); Ryan 2011 (B); Zhu 2013 (C)

| Outcomes                        | Quality of the evidence (GRADE) | Anticipated absolute effects (95% CI)<br>MD between nasal pillows and nasal mask                                                                                                                    | № of participants (studies)   |
|---------------------------------|---------------------------------|-----------------------------------------------------------------------------------------------------------------------------------------------------------------------------------------------------|-------------------------------|
| AHI                             | ⊕⊕○○<br>LOW <sup>1,2</sup>      | The mean AHI in the nasal pillow group was 2.5 (1.9). The mean AHI in the nasal group was 2.1 (1.7). The mean AHI in the nasal pillow group was 0.36 events/hr greater (1.14 greater to 0.42 lower) | 160<br>(3 RCT) <sup>A,C</sup> |
| Adherence (hrs/night)*          | ⊕⊕○○<br>LOW <sup>1,2</sup>      | The mean adherence in the nasal pillow group was 0.32 hrs/night more (0.18 fewer to 0.82 more)                                                                                                      | 160<br>(3 RCT) <sup>A,C</sup> |
| Adherence (% nights used)*      | ⊕⊕○○<br>LOW <sup>1,2</sup>      | The mean adherence (% nights used) in the nasal pillow group was 4.1% more (6.73 fewer to 14.93 more)                                                                                               | 81<br>(2 RCT) <sup>A,B</sup>  |
| Self-reported Sleepiness (ESS)* | ⊕⊕○○<br>LOW <sup>1,2</sup>      | The mean ESS score in the nasal pillow group was 0.17 lower (1.59 lower to 1.24 greater)                                                                                                            | 120<br>(2 RCT) <sup>A,B</sup> |
| Sleep-related QOL* (FOSQ)       | ⊕⊕○○<br>LOW <sup>1,2</sup>      | The mean FOSQ score in the nasal pillow group was 0.00 different (0.97 lower to 0.97 greater)                                                                                                       | 39<br>(1 RCT) <sup>A</sup>    |
| Side Effects                    | ⊕⊕○○<br>LOW <sup>1,2</sup>      | Meta-analysis not performed due to inconsistent methods of measuring and reporting of side effects across studies                                                                                   | 80 (3 RCT) <sup>A,C</sup>     |

\*Critical Outcomes

<sup>1</sup>Study funded by industry

<sup>2</sup>95% CI of absolute effect crosses clinical significance threshold and/or small sample size

**Figure S95. Oronasal mask vs. Nasal mask (AHI, events/hr) [RCTs]**

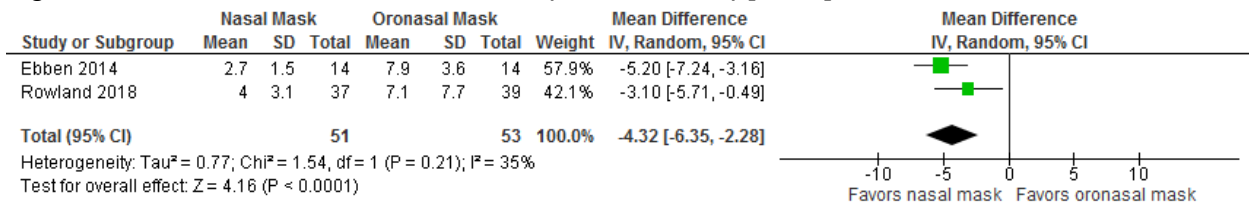

**Figure S96. Oronasal mask vs. Nasal mask (Adherence, hrs/night) [RCTs]**

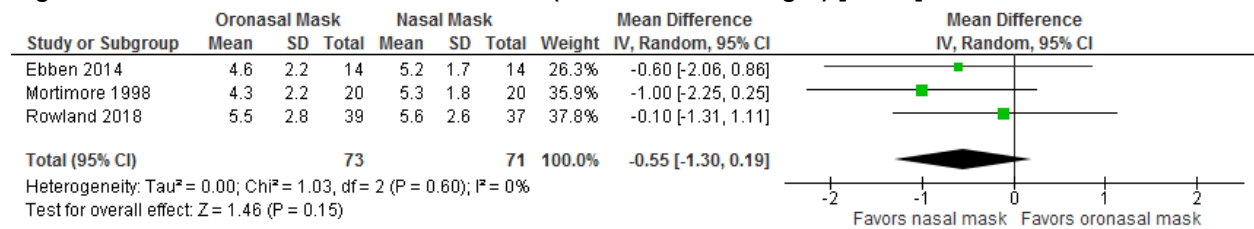

**Figure S97. Oronasal mask vs. Nasal mask (Adherence, hrs/night) [non-RCTs]**

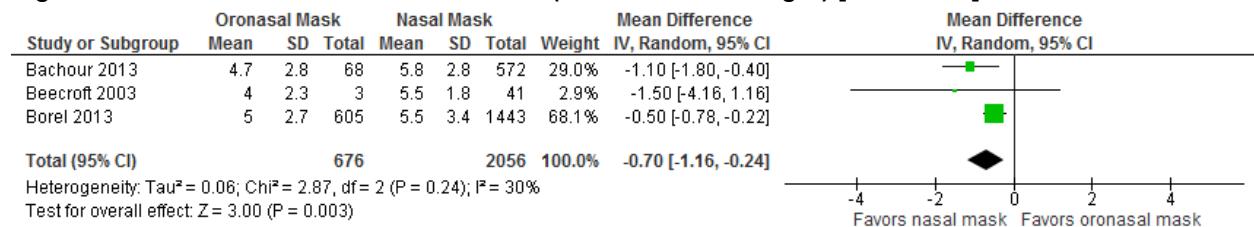

**Figure S98. Oronasal mask vs. Nasal mask (ESS) [RCTs]**

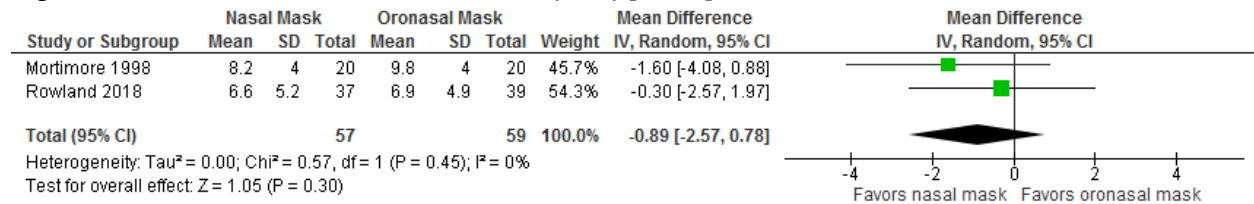

**Table S13. Summary of Findings Table for Oronasal mask vs. Nasal mask in the treatment of obstructive sleep apnea in adults**

| Outcomes                               | Quality of the evidence (GRADE) | Anticipated absolute effects (95% CI)                                                                             | No of participants (studies)                           |
|----------------------------------------|---------------------------------|-------------------------------------------------------------------------------------------------------------------|--------------------------------------------------------|
|                                        |                                 | MD between oronasal mask and nasal mask                                                                           |                                                        |
| AHI [RCTs]                             | ⊕⊕○○<br>LOW <sup>1,2</sup>      | The mean AHI in the oronasal mask group was 4.3 events/hr higher (2.3 higher to 6.4 higher)                       | 90 (2 RCTs) <sup>A,F</sup>                             |
| Adherence (hrs/night)* [RCTs]          | ⊕⊕○○<br>LOW <sup>1</sup>        | The mean adherence in the oronasal mask group was 0.55 hrs/night lower (1.30 lower to 0.19 higher)                | 144 (3 RCT) <sup>A,B,F</sup>                           |
| Adherence (% nights > 4hrs) [RCTs]     | ⊕⊕○○<br>LOW <sup>1,2</sup>      | The mean adherence (% nights > 4hrs) in the oronasal mask group was 2.00% lower (16.4 lower to 12.4 higher)       | 76 (1 RCT) <sup>F</sup>                                |
| Adherence (hrs/night) [non-RCTs]       | ⊕⊕○○<br>LOW <sup>1</sup>        | The mean adherence in the oronasal mask group was 0.70 hrs/night lower (0.24 lower to 1.16 lower)                 | 2752 (3 observational studies) <sup>C,E</sup>          |
| Self-reported Sleepiness (ESS)* [RCTs] | ⊕⊕○○<br>LOW <sup>1,2</sup>      | The mean ESS score in the oronasal mask group was 0.89 lower (2.57 lower to 0.78 higher)                          | 59 (2 RCT) <sup>B,F</sup>                              |
| Side Effects                           | ⊕○○○<br>VERY LOW <sup>1,2</sup> | Meta-analysis not performed due to inconsistent methods of measuring and reporting of side effects across studies | 2112 (2 RCT, 2 observational studies) <sup>B,D,F</sup> |

\*Critical Outcomes

<sup>1</sup>Study funded by industry  
<sup>2</sup>95% CI of absolute effect crosses clinical significance threshold and/or small sample size

**Table S14. Summary of Findings Table for Oral mask vs. Nasal mask in the treatment of obstructive sleep apnea in adults**

References: Anderson 2003 (A); Khanna 2003 (B); Beecroft 2003 (C); Borel 2013 (D)

| Outcomes                                            | Quality of the evidence (GRADE) | Anticipated absolute effects (95% CI)<br>MD between oral mask and nasal mask                                      | № of participants (studies)                          |
|-----------------------------------------------------|---------------------------------|-------------------------------------------------------------------------------------------------------------------|------------------------------------------------------|
| AHI                                                 | ⊕○○○<br>VERY LOW <sup>1,2</sup> | The mean AHI in the oral mask group was 5.00 events/hr greater (13.85 fewer to 3.85 greater)                      | 42<br>(1 RCT) <sup>A</sup>                           |
| Adherence (hrs/night)*                              | ⊕○○○<br>VERY LOW <sup>1,2</sup> | The mean adherence in the oral mask group was 0.90 hrs/night higher (0.73 lower to 2.53 higher)                   | 38<br>(1 RCT) <sup>B</sup>                           |
| Self-reported Sleepiness (ESS)*                     | ⊕⊕○○<br>LOW <sup>1,2</sup>      | The mean ESS score in the oral mask group was 1.00 greater (3.84 fewer to 1.84 more)                              | 42<br>(1 RCT) <sup>A</sup>                           |
| Side Effects                                        | ⊕○○○<br>VERY LOW <sup>1,2</sup> | Meta-analysis not performed due to inconsistent methods of measuring and reporting of side effects across studies | 2151(2 RCTs, 2 observational studies) <sup>A-D</sup> |
| <b>Relative Effect</b>                              |                                 |                                                                                                                   |                                                      |
| Baseline Risk      Comparative risk                 |                                 |                                                                                                                   |                                                      |
| Adherence (#patients with mean usage >4 hrs/night)* | ⊕⊕○○<br>LOW <sup>1,2</sup>      | 667 per 1,000<br><br>734 per 1000 (342 to 935)<br><br>OR 1.38 (0.26 to 7.22)                                      | 27<br>(1 RCT) <sup>B</sup>                           |

\*Critical Outcomes

<sup>1</sup>Study funded by industry

<sup>2</sup>Quality of evidence was downgraded due to imprecision (i.e., 95% CI of mean difference crosses clinical decision threshold and/or small sample size)

## Humidified PAP vs. standard PAP for the treatment of obstructive sleep apnea in adults

**Figure S99. Humidified PAP vs. Standard PAP (Adherence, hrs/night)**

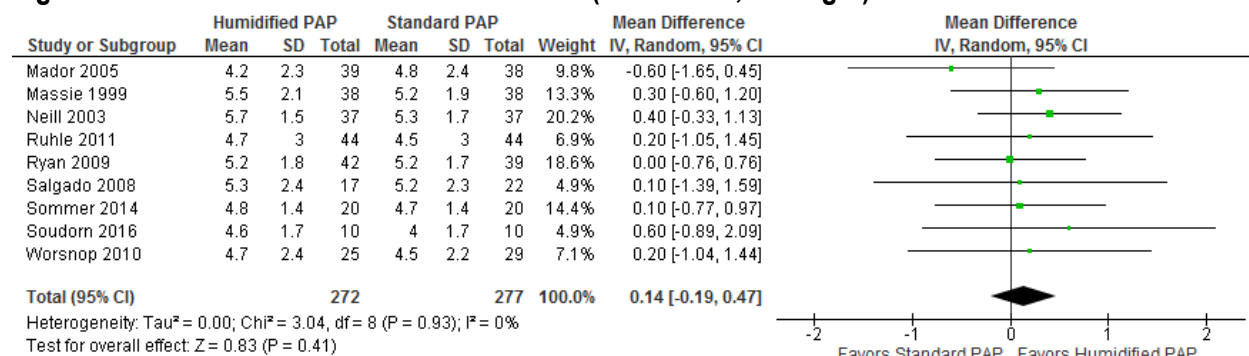

**Figure S100. Humidified PAP vs. Standard PAP (ESS)**

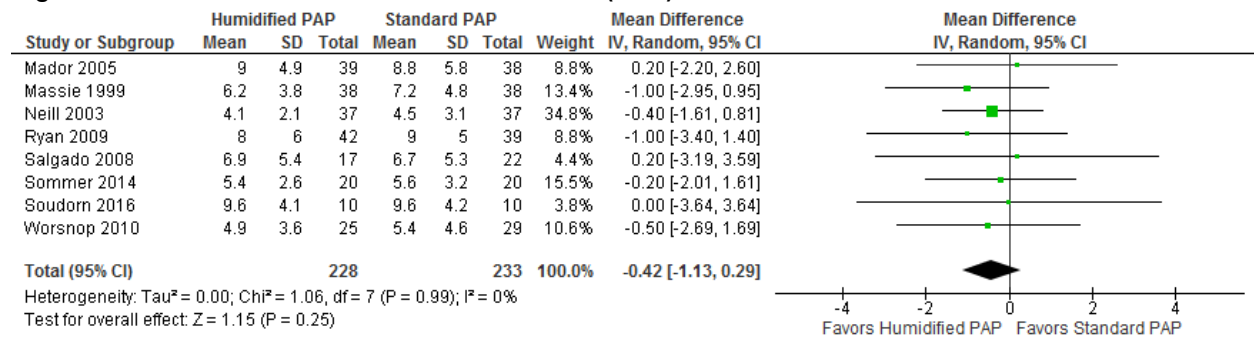

**Figure S101. Humidified PAP vs. Standard PAP (QSQ & FOSQ & SAQLI)**

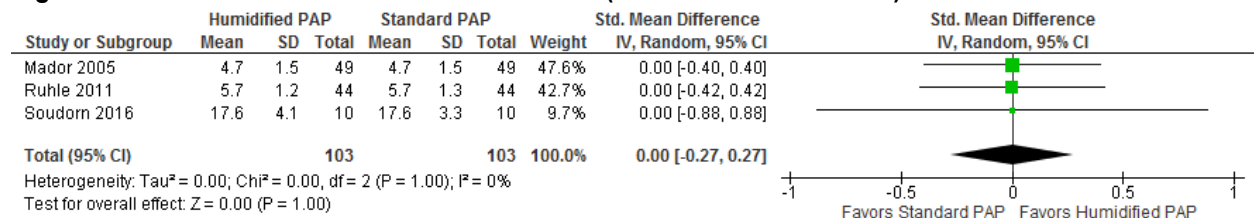

**Figure S102. Humidified PAP vs. Standard PAP (Nasal Discharge, incidence)**

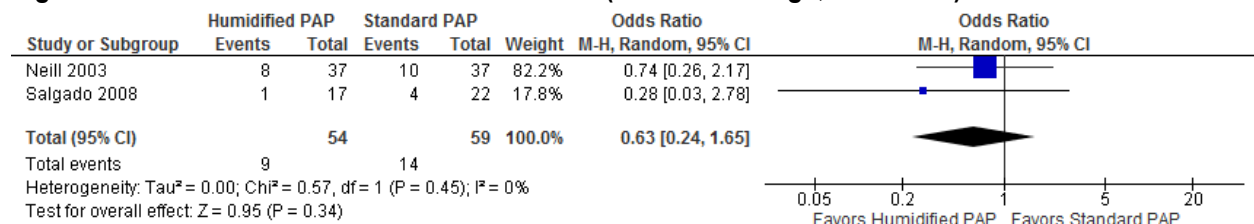

**Figure S103. Humidified PAP vs. Standard PAP (Nasal Congestion, incidence)**

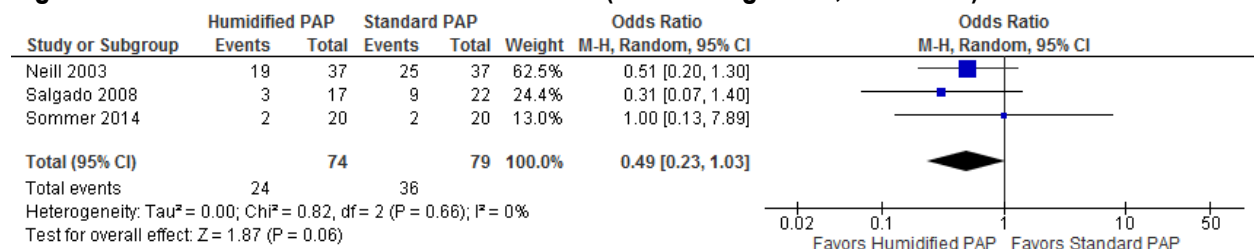

**Figure S104. Humidified PAP vs. Standard PAP (Dry nose, incidence)**

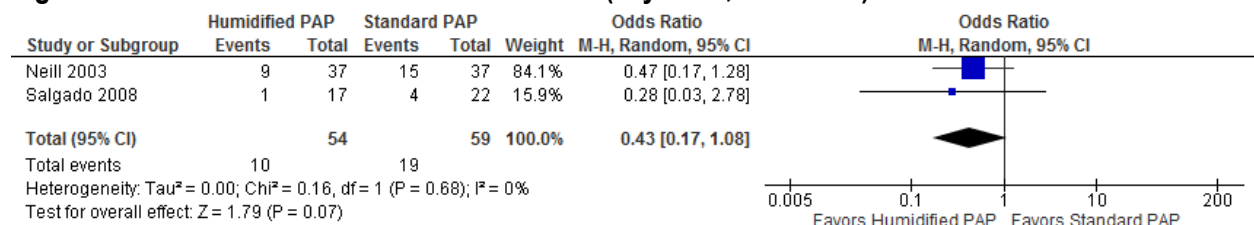

**Figure S105. Humidified PAP vs. Standard PAP (Bleeding nose, incidence)**

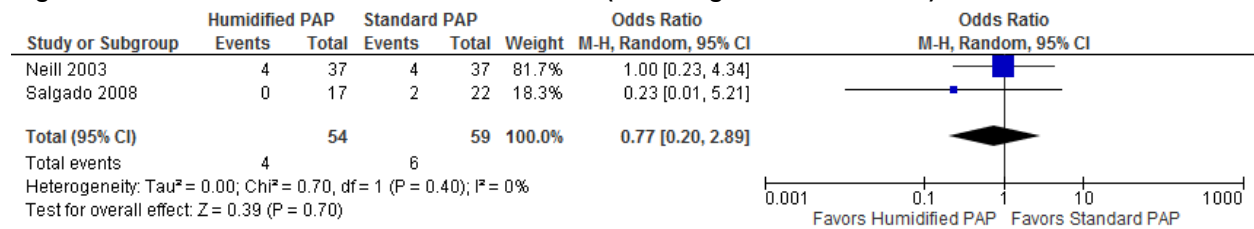

**Figure S106. Humidified PAP vs. Standard PAP (Dry Mouth/Throat, incidence)**

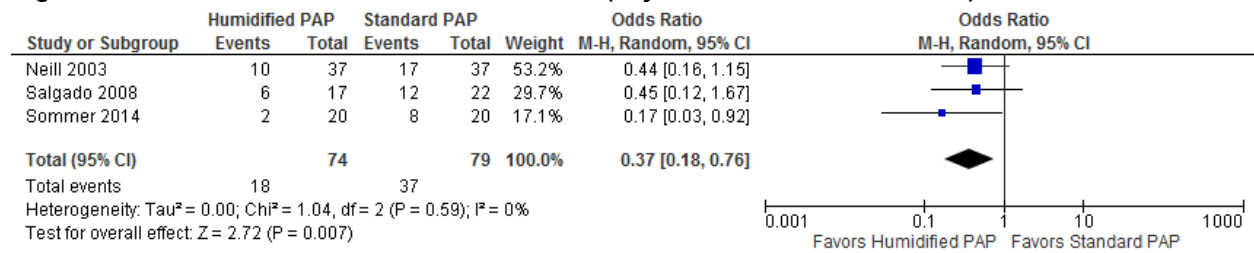

**Table S15. Summary of Findings Table for Humidified PAP vs. Standard PAP in the treatment of obstructive sleep apnea in adults**

**References:** Mador 2005 (A); Massie 1999 (B); Neill 2003 (C); Rühle 2011 (D); Ryan 2009 (E); Salgado 2008 (F); Sommer 2014 (G); Worsnop 2010 (H); Soudorn 2016 (I)

| Outcomes                                        | Quality of the evidence (GRADE) | Anticipated absolute effects (95% CI)                                                                               |                                                                             | No of participants (studies)       |
|-------------------------------------------------|---------------------------------|---------------------------------------------------------------------------------------------------------------------|-----------------------------------------------------------------------------|------------------------------------|
|                                                 |                                 | Baseline Risk                                                                                                       | Comparative risk                                                            |                                    |
| Adherence (hrs/night)*                          | ⊕⊕⊕⊕<br>HIGH                    | The mean adherence in the humidified PAP group was 0.14 hrs/night greater (0.19 lower to 0.47 greater)              |                                                                             | 549<br>(9 RCTs) <sup>A,I</sup>     |
| Self-reported Sleepiness (ESS)*                 | ⊕⊕⊕⊕<br>HIGH                    | The mean ESS score in the humidified PAP group was 0.42 lower (1.13 lower to 0.29 higher)                           |                                                                             | 461<br>(8 RCTs) <sup>A,C,E,I</sup> |
| Sleep-related QOL* (SAQLI, FOSQ & QSQ combined) | ⊕⊕○○<br>LOW 1                   | The mean QSQ/SAQLI/FOSQ in the humidified PAP group was 0 standard deviations different (0.27 lower to 0.27 higher) |                                                                             | 206 (3 RCTs) <sup>A,D,I</sup>      |
| <b>Relative Effect</b>                          |                                 |                                                                                                                     |                                                                             |                                    |
| Baseline Risk      Comparative risk             |                                 |                                                                                                                     |                                                                             |                                    |
| Nasal discharge (incidence)*                    | ⊕⊕○○<br>LOW 1                   | 237 per 1,000                                                                                                       | <b>164 per 1000</b><br>(69 to 339)<br><br><b>OR 0.63</b><br>(0.24 to 1.65)  | 113<br>(2 RCTs) <sup>C,F</sup>     |
| Nasal congestion (incidence)*                   | ⊕⊕○○<br>LOW 1                   | 522 per 1,000                                                                                                       | <b>348 per 1000</b><br>(201 to 529)<br><br><b>OR 0.49</b><br>(0.23 to 1.03) | 153<br>(3 RCTs) <sup>C,F,G</sup>   |
| Dry nose (incidence)*                           | ⊕⊕○○<br>LOW 1                   | 322 per 1,000                                                                                                       | <b>170 per 1000</b><br>(75 to 339)<br><br><b>OR 0.43</b><br>(0.17 to 1.08)  | 113<br>(2 RCTs) <sup>C,F</sup>     |



|                                     |                               |               |                                                                         |                                  |
|-------------------------------------|-------------------------------|---------------|-------------------------------------------------------------------------|----------------------------------|
| Bleeding nose (incidence)*          | ⊕⊕○○<br>LOW <sup>1</sup>      | 102 per 1,000 | <b>80 per 1000</b><br>(22 to 247)<br><b>OR 0.77</b><br>(0.20 to 2.89)   | 113<br>(2 RCTs) <sup>C,F</sup>   |
| Dry mouth/throat (incidence)*       | ⊕⊕⊕○<br>MODERATE <sup>1</sup> | 536 per 1,000 | <b>276 per 1000</b><br>(131 to 487)<br><b>OR 0.37</b><br>(0.18 to 0.76) | 153<br>(3 RCTs) <sup>C,F,G</sup> |
| Sinus infection (incidence)*        | ⊕⊕○○<br>LOW <sup>1</sup>      | 135 per 1,000 | <b>135 per 1000</b><br>(39 to 372)<br><b>OR 1.00</b><br>(0.26 to 3.79)  | 74<br>(1 RCT) <sup>C</sup>       |
| Sinus pain or headache (incidence)* | ⊕⊕○○<br>LOW <sup>1</sup>      | 270 per 1,000 | <b>135 per 1000</b><br>(46 to 340)<br><b>OR 0.42</b><br>(0.13 to 1.39)  | 74<br>(1 RCT) <sup>C</sup>       |
| Sore throat (incidence)*            | ⊕⊕○○<br>LOW <sup>1</sup>      | 162 per 1,000 | <b>55 per 1000</b><br>(11 to 233)<br><b>OR 0.30</b><br>(0.06 to 1.57)   | 74<br>(1 RCT) <sup>C</sup>       |
| Hoarse voice (incidence)*           | ⊕⊕○○<br>LOW <sup>1</sup>      | 135 per 1,000 | <b>109 per 1000</b><br>(29 to 330)<br><b>OR 0.78</b><br>(0.19 to 3.15)  | 74<br>(1 RCT) <sup>C</sup>       |
| Cough (incidence)*                  | ⊕⊕○○<br>LOW <sup>1</sup>      | 243 per 1,000 | <b>298 per 1000</b><br>(131 to 543)<br><b>OR 1.32</b><br>(0.47 to 3.69) | 74<br>(1 RCT) <sup>C</sup>       |
| Reduced smell (incidence)*          | ⊕⊕○○<br>LOW <sup>1</sup>      | 216 per 1,000 | <b>162 per 1000</b><br>(57 to 385)<br><b>OR 0.70</b><br>(0.22 to 2.27)  | 74<br>(1 RCT) <sup>C</sup>       |

\*Critical Outcomes  
<sup>1</sup>Quality of evidence was downgraded due to imprecision (i.e., 95% CI of mean difference crosses clinical decision threshold and/or small sample size)

**Table S16. Summary of Possible PAP-Related Side Effects (Adapted from Gay et al, 2006<sup>1</sup>)**

|                                                                                                                                                                                                                                                                                                                                                       |                                                                                                                                                                                                                                                                                                                |
|-------------------------------------------------------------------------------------------------------------------------------------------------------------------------------------------------------------------------------------------------------------------------------------------------------------------------------------------------------|----------------------------------------------------------------------------------------------------------------------------------------------------------------------------------------------------------------------------------------------------------------------------------------------------------------|
| <p><b>Interface</b></p> <ul style="list-style-type: none"> <li>Mask leak</li> <li>Skin abrasion/ulceration (pain)</li> <li>Mask allergy</li> <li>Conjunctivitis/Sore eyes</li> <li>Dermatitis/facial irritation</li> <li>Claustrophobia</li> </ul> <p><b>Pressure-Related (Airway)</b></p> <ul style="list-style-type: none"> <li>Rhinitis</li> </ul> | <p><b>Equipment-Related</b></p> <ul style="list-style-type: none"> <li>Noise</li> <li>Smell</li> <li>Tubing condensation</li> <li>Cumbersome equipment</li> <li>Spousal intolerance/less intimacy</li> <li>Ramp overuse</li> <li>Equipment maintenance and cleaning</li> </ul> <p><b>Equipment Failure</b></p> |
|-------------------------------------------------------------------------------------------------------------------------------------------------------------------------------------------------------------------------------------------------------------------------------------------------------------------------------------------------------|----------------------------------------------------------------------------------------------------------------------------------------------------------------------------------------------------------------------------------------------------------------------------------------------------------------|

|                                                                                                                                                                                                                                                                                                                                                                                                    |                                                                                                                                                                                            |
|----------------------------------------------------------------------------------------------------------------------------------------------------------------------------------------------------------------------------------------------------------------------------------------------------------------------------------------------------------------------------------------------------|--------------------------------------------------------------------------------------------------------------------------------------------------------------------------------------------|
| Rhinorrhea<br>Sneezing<br>Desiccation<br>Sinusitis<br>Headache<br>Epistaxis<br>Otitis/Ear pain<br>Air swallowing/aspiration<br>Belching<br><br><b>Pressure-Related</b><br>Mouth leak (dry mouth) or mask leak<br>Pressure intolerance<br>Sense of suffocation or difficulty exhaling<br>Tinnitus<br>Aerophagia<br>Pneumoencephalus<br>Central sleep apnea<br>Prolonged oxyhemoglobin desaturations | Lifespan of machine, tubing and mask<br>Recurrence of OSA<br><br><b>General</b><br>Periodic limb movements<br>Anxiety<br>Insomnia<br>Headache<br>Fatigue/Feeling tired<br>Chest discomfort |
|----------------------------------------------------------------------------------------------------------------------------------------------------------------------------------------------------------------------------------------------------------------------------------------------------------------------------------------------------------------------------------------------------|--------------------------------------------------------------------------------------------------------------------------------------------------------------------------------------------|

<sup>1</sup> Gay P, Weaver T, Loube D, Iber C; Positive Airway Pressure Task Force.; Standards of Practice Committee.; American Academy of Sleep Medicine. Evaluation of positive airway pressure treatment for sleep related breathing disorders in adults. Sleep. 2006 Mar;29(3):381-401.

**Table S17. Summary of Measures of Neurocognitive Function\***

| Domain of Neurocognitive Function |                        | Tests                                                                                                                                                                                       |
|-----------------------------------|------------------------|---------------------------------------------------------------------------------------------------------------------------------------------------------------------------------------------|
| <b>Processing speed</b>           |                        | Digit Symbol Substitution Test; 8-Choice Reaction Time; Reaction Time, Trail Making A                                                                                                       |
| <b>Attention/Vigilance</b>        |                        | PVT-Reaction Time; PVT Lapses; Rapid Visual Information Processing; SteerClear; Cogscreen Pathfinder Number Test – Total Time; Cogscreen Shifting Attention Task                            |
| <b>Memory</b>                     |                        | Digit Span Backwards; Weschler Memory Scale; Benton Visual Retention Test; Verbal Recall; Word Pair Memory Recall; WMS-R Visual Reproduction; Buschke Selective Reminding Test - Sum Recall |
| <b>Intelligence</b>               |                        | Performance IQ Decrement; Weschler Adult Intelligence Scale                                                                                                                                 |
| <b>Executive Function</b>         | <i>Fluid Reasoning</i> | Block Design; Executive Maze                                                                                                                                                                |
|                                   | <i>Shifting</i>        | Trail Making B; Cogscreen Shifting Attention Task                                                                                                                                           |
|                                   | <i>Inhibition</i>      | Stroop Color-Word                                                                                                                                                                           |
|                                   | <i>Updating</i>        | PASAT -1, -1.2, -2, -3, -4; Sustained Working Memory                                                                                                                                        |
|                                   | <i>Generativity</i>    | COWAT Letter Fluency                                                                                                                                                                        |

\*Identification of the principal neurocognitive domain assessed by each test was established by the Task Force on the basis of literature review and discussions with Dr Romola Bucks (University of Western Australia) and Dr Gerry Taylor (Case Western Reserve University).
